# Supplementary material for: Metal-free electrochemistry promoted radical cascade cyclization to access CF3-containing benzimidazo[2,1-a]isoquinolin-6(5H)-ones
Source: Royal Society of Chemistry journal article supplement (doi:10.1039/d3ob00854a), 2023-01-01
Supplement: d3ob00854a1.pdf [file d3ob00854a1.pdf]

Supporting Information for

**Metal-Free Electrochemical Promoted Radical Cascade Cyclization  
to Access CF<sub>3</sub> Containing Benzimidazo[2,1-*a*]isoquinolin-6(5*H*)-ones**

Changjun Zhang,<sup>a\*</sup> Zhichen Yu,<sup>a</sup> Yuxin Ding,<sup>a</sup> Yuan Shi<sup>a</sup> and Yuanyuan Xie<sup>a, b, c\*</sup>

<sup>a</sup> College of Pharmaceutical Science, Zhejiang University of Technology, Hangzhou, 310014, China.

<sup>b</sup> Collaborative Innovation Center of Yangtze River Delta Region Green Pharmaceuticals, Zhejiang University of Technology, Hangzhou, 310014, China.

<sup>c</sup> Key Laboratory for Green Pharmaceutical Technologies and Related Equipment of Ministry of Education, Key Laboratory of Pharmaceutical Engineering of Zhejiang Province, Hangzhou, 310014, China.

E-mail: xyycz@zjut.edu.cn (Y. Xie).

**Table for Contents**

|                                                                                                   |            |
|---------------------------------------------------------------------------------------------------|------------|
| <b>General information .....</b>                                                                  | <b>S2</b>  |
| <b>Experimental Section .....</b>                                                                 | <b>S3</b>  |
| <b>Characterization of the products .....</b>                                                     | <b>S4</b>  |
| <b>Copies of NMR spectra:<sup>1</sup>H-, <sup>13</sup>C- and <sup>19</sup>F-NMR spectra .....</b> | <b>S11</b> |
| <b>Reference .....</b>                                                                            | <b>S50</b> |

## General information

All reactions were carried out in dried sealed Schlenk tubes with magnetic stirring. All anhydrous and oxygen-free environments were performed under nitrogen atmosphere in oven-dried glassware using Schlenk techniques. All the chemicals were obtained commercially and used without any prior purification. All products were isolated by short chromatography on a silica gel (200-300 mesh) column using hexane and ethyl acetate.  $^1\text{H}$ ,  $^{13}\text{C}$  and  $^{19}\text{F}$  NMR spectra were recorded on a Bruker Advance 400 spectrometer at ambient temperature with  $\text{CDCl}_3$  as solvent and tetramethylsilane (TMS) as the internal standard. Analytical thin layer chromatography (TLC) was performed on Merk precoated TLC (silica gel 60 F254) plates.

### Optimized reaction conditions<sup>[a]</sup>

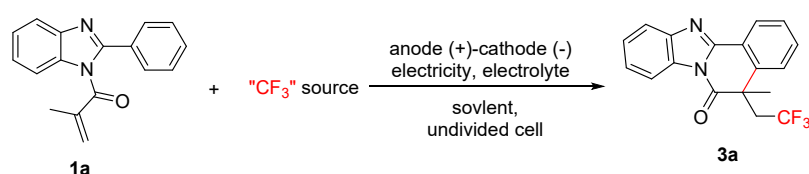

| Entry            | electrode     | electricity | Solvent          | "CF <sub>3</sub> " source          | electrolyte                                   | electrolyte equiv. | atmosphere | Temperature(°C) | Yield(%) <sup>b</sup> |
|------------------|---------------|-------------|------------------|------------------------------------|-----------------------------------------------|--------------------|------------|-----------------|-----------------------|
| 1                | C (+)-Ni (-)  | 5 mA        | MeCN             | CF <sub>3</sub> SO <sub>2</sub> Na | <sup>n</sup> Bu <sub>4</sub> NBF <sub>4</sub> | 1.0                | air        | 50              | 63                    |
| 2                | C (+)-C (-)   | 5 mA        | MeCN             | CF <sub>3</sub> SO <sub>2</sub> Na | <sup>n</sup> Bu <sub>4</sub> NBF <sub>4</sub> | 1.0                | air        | 50              | 57                    |
| 3                | C (+)-Pt (-)  | 5 mA        | MeCN             | CF <sub>3</sub> SO <sub>2</sub> Na | <sup>n</sup> Bu <sub>4</sub> NBF <sub>4</sub> | 1.0                | air        | 50              | 67                    |
| 4                | Pt (+)-Pt (-) | 5 mA        | MeCN             | CF <sub>3</sub> SO <sub>2</sub> Na | <sup>n</sup> Bu <sub>4</sub> NBF <sub>4</sub> | 1.0                | air        | 50              | 37                    |
| 5 <sup>[c]</sup> | C (+)-Pt (-)  | 3 mA        | MeCN             | CF <sub>3</sub> SO <sub>2</sub> Na | <sup>n</sup> Bu <sub>4</sub> NBF <sub>4</sub> | 1.0                | air        | 50              | 42                    |
| 6 <sup>[d]</sup> | C (+)-Pt (-)  | 8 mA        | MeCN             | CF <sub>3</sub> SO <sub>2</sub> Na | <sup>n</sup> Bu <sub>4</sub> NBF <sub>4</sub> | 1.0                | air        | 50              | 51                    |
| 7 <sup>[d]</sup> | C (+)-Pt (-)  | 10 mA       | MeCN             | CF <sub>3</sub> SO <sub>2</sub> Na | <sup>n</sup> Bu <sub>4</sub> NBF <sub>4</sub> | 1.0                | air        | 50              | 30                    |
| 8                | C (+)-Pt (-)  | 0 mA        | MeCN             | CF <sub>3</sub> SO <sub>2</sub> Na | <sup>n</sup> Bu <sub>4</sub> NBF <sub>4</sub> | 1.0                | air        | 50              | N.D.                  |
| 9                | C (+)-Pt (-)  | 5 mA        | THF              | CF <sub>3</sub> SO <sub>2</sub> Na | <sup>n</sup> Bu <sub>4</sub> NBF <sub>4</sub> | 1.0                | air        | 50              | <10                   |
| 10               | C (+)-Pt (-)  | 5 mA        | DMF              | CF <sub>3</sub> SO <sub>2</sub> Na | <sup>n</sup> Bu <sub>4</sub> NBF <sub>4</sub> | 1.0                | air        | 50              | N.D.                  |
| 11               | C (+)-Pt (-)  | 5 mA        | Acetone          | CF <sub>3</sub> SO <sub>2</sub> Na | <sup>n</sup> Bu <sub>4</sub> NBF <sub>4</sub> | 1.0                | air        | 50              | 21                    |
| 12               | C (+)-Pt (-)  | 5 mA        | H <sub>2</sub> O | CF <sub>3</sub> SO <sub>2</sub> Na | <sup>n</sup> Bu <sub>4</sub> NBF <sub>4</sub> | 1.0                | air        | 50              | N.D.                  |
| 13               | C (+)-Pt (-)  | 5 mA        | MeCN             | Togni's II                         | <sup>n</sup> Bu <sub>4</sub> NBF <sub>4</sub> | 1.0                | air        | 50              | N.D.                  |
| 14               | C (+)-Pt (-)  | 5 mA        | MeCN             | TMSCF <sub>3</sub>                 | <sup>n</sup> Bu <sub>4</sub> NBF <sub>4</sub> | 1.0                | air        | 50              | N.D.                  |
| 15               | C (+)-Pt (-)  | 5 mA        | MeCN             | CF <sub>3</sub> SO <sub>2</sub> Na | Et <sub>4</sub> NClO <sub>4</sub>             | 1.0                | air        | 50              | 64                    |
| 16               | C (+)-Pt (-)  | 5 mA        | MeCN             | CF <sub>3</sub> SO <sub>2</sub> Na | TBAB                                          | 1.0                | air        | 50              | <5                    |
| 17               | C (+)-Pt (-)  | 5 mA        | MeCN             | CF <sub>3</sub> SO <sub>2</sub> Na | TBAI                                          | 1.0                | air        | 50              | <5                    |
| 18               | C (+)-Pt (-)  | 5 mA        | MeCN             | CF <sub>3</sub> SO <sub>2</sub> Na | <sup>n</sup> Bu <sub>4</sub> NPF <sub>6</sub> | 1.0                | air        | 50              | 63                    |
| 19               | C (+)-Pt (-)  | 5 mA        | MeCN             | CF <sub>3</sub> SO <sub>2</sub> Na | LiClO <sub>4</sub>                            | 1.0                | air        | 50              | 34                    |
| 20               | C (+)-Pt (-)  | 5 mA        | MeCN             | CF <sub>3</sub> SO <sub>2</sub> Na | KI                                            | 1.0                | air        | 50              | <5                    |
| 21               | C (+)-Pt (-)  | 5 mA        | MeCN             | CF <sub>3</sub> SO <sub>2</sub> Na | KF                                            | 1.0                | air        | 50              | 23                    |
| 22               | C (+)-Pt (-)  | 5 mA        | MeCN             | CF <sub>3</sub> SO <sub>2</sub> Na | <sup>n</sup> Bu <sub>4</sub> NBF <sub>4</sub> | 0.5                | air        | 50              | 61                    |
| 23               | C (+)-Pt (-)  | 5 mA        | MeCN             | CF <sub>3</sub> SO <sub>2</sub> Na | <sup>n</sup> Bu <sub>4</sub> NBF <sub>4</sub> | 1.5                | air        | 50              | 67                    |

|    |              |      |      |                                    |                                               |     |                |      |    |
|----|--------------|------|------|------------------------------------|-----------------------------------------------|-----|----------------|------|----|
| 24 | C (+)-Pt (-) | 5 mA | MeCN | CF <sub>3</sub> SO <sub>2</sub> Na | <sup>n</sup> Bu <sub>4</sub> NBF <sub>4</sub> | 1.0 | N <sub>2</sub> | 50   | 65 |
| 25 | C (+)-Pt (-) | 5 mA | MeCN | CF <sub>3</sub> SO <sub>2</sub> Na | <sup>n</sup> Bu <sub>4</sub> NBF <sub>4</sub> | 1.0 | air            | r.t. | 60 |
| 26 | C (+)-Pt (-) | 5 mA | MeCN | CF <sub>3</sub> SO <sub>2</sub> Na | <sup>n</sup> Bu <sub>4</sub> NBF <sub>4</sub> | 1.0 | air            | 80   | 59 |

<sup>[a]</sup>Reaction conditions: **1a** (0.3 mmol), CF<sub>3</sub> source (2.0 eq.), electrolyte (1.0 eq.), solvent (6 mL), constant current electricity, stirred, 3 h. <sup>[b]</sup>Isolated yield. <sup>[c]</sup>5 h. <sup>[d]</sup>2 h.

## Experimental Section

### General procedure for the synthesis of compounds **1** (**1a** as an example):

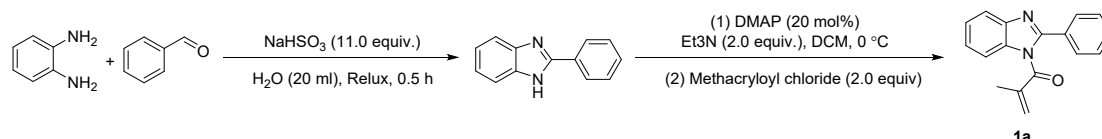

**Step 1:** In a round-bottomed flask (50 mL) equipped with a magnetic stirrer, a mixture of benzaldehyde (5.0 mmol, 578  $\mu$ L) and NaHSO<sub>3</sub> (11.0 eq, 5.73 g) in H<sub>2</sub>O (20.0 mL) was prepared. When the mixture reached refluxing temperature, *o*-phenylenediamine (5.0 mmol, 541 mg) were added. The resulting mixture was stirred for appropriate time. After completion of the reaction, the reaction mixture was vacuum filtered after cooling to room temperature by a glass funnel. The residues were washed by water (20 mL  $\times$  2), dried in air dry oven to give the corresponding product.

**Step 2:** To the solution of 2-(*o*-tolyl)-1H-benzo[*d*]imidazole (3 mmol, 625 mg) and DMAP (0.6 mmol, 73 mg) in DCM (0.5 M) was added Et<sub>3</sub>N (6 mmol, 834  $\mu$ L) and methacryloyl chloride (6 mmol, reaction was complete according to TLC analysis, and water (20 mL) was added to the mixture, which was extracted with CH<sub>2</sub>Cl<sub>2</sub> (15 mL  $\times$  3). Then the organic solvent was concentrated in vacuo. The residue was purified by flash column chromatography with Ethyl acetate and Petroleum ether as eluent to give **1a**.

### Photos of the electrochemical setup

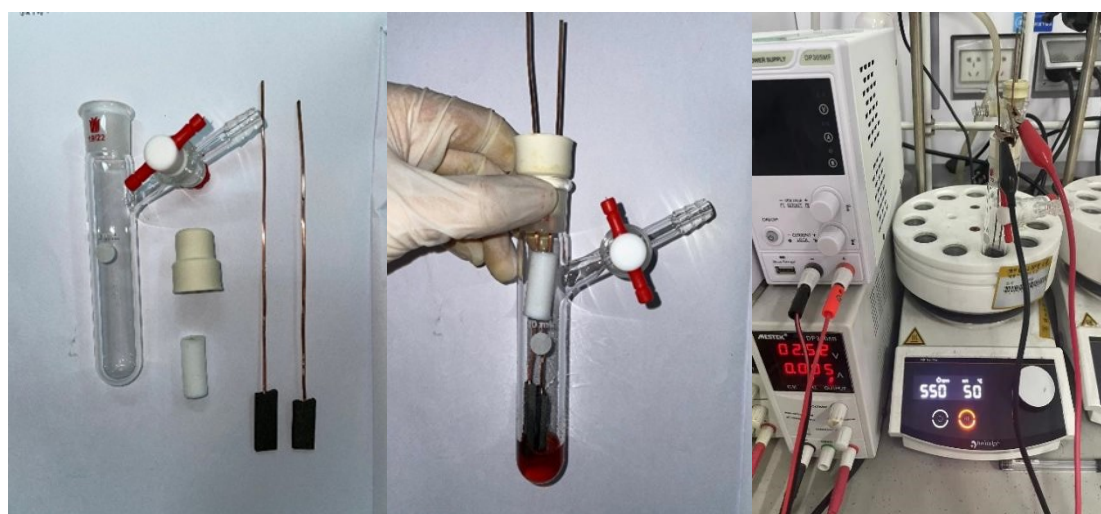

### Cyclic voltammetry studies

The cyclic voltammograms experiments were conducted in a Schlenk tube that contained the

substance dissolved in a 0.1 M solution of tetrabutylammonium tetrafluoroborate in acetonitrile. A glassy carbon electrode working electrode, a platinum wire counter electrode and an Ag/Ag<sup>+</sup> reference electrode were used. The reference electrode was stored in silver nitrate solution for activation before use. The relevant parameters were controlled by an electrochemical workstation CHI600E.

## Characterization of the products

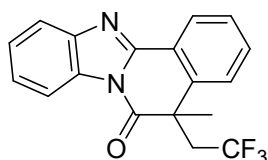

### 5-methyl-5-(2,2,2-trifluoroethyl)benzo[4,5]imidazo[2,1-a]isoquinolin-6(5H)-one (3a)

White solid; m.p. = 128.5-129.3°C. <sup>1</sup>H NMR (400 MHz, CDCl<sub>3</sub>) δ 8.53 (dd, *J* = 7.8, 1.5 Hz, 1H), 8.39 – 8.32 (m, 1H), 7.87 – 7.80 (m, 1H), 7.62 – 7.56 (m, 1H), 7.56 – 7.49 (m, 1H), 7.49 – 7.41 (m, 3H), 3.58 – 3.36 (m, 1H), 3.02 – 2.85 (m, 1H), 1.76 (s, 3H). <sup>13</sup>C NMR (100 MHz, CDCl<sub>3</sub>) δ 171.1, 149.4, 144.1, 138.6, 131.8, 131.5, 128.6, 126.6, 126.5, 126.3, 126.0, 125.1 (q, <sup>1</sup>*J*<sub>C-CF<sub>3</sub></sub> = 277.0 Hz), 122.5, 120.1, 115.8, 45.4 (q, <sup>3</sup>*J*<sub>C-CF<sub>3</sub></sub> = 2.3 Hz), 44.1 (q, <sup>2</sup>*J*<sub>C-CF<sub>3</sub></sub> = 27.7 Hz), 31.1. <sup>19</sup>F NMR (376 MHz, CDCl<sub>3</sub>) δ -61.34. Spectroscopic data are in accordance with those described in the literature.<sup>[1]</sup>

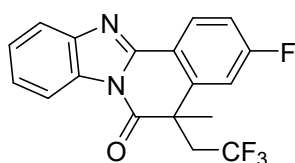

### 3-fluoro-5-methyl-5-(2,2,2-trifluoroethyl)benzo[4,5]imidazo[2,1-a]isoquinolin-6(5H)-one (3b)

White solid; m.p. = 139.6-141.2°C. <sup>1</sup>H NMR (400 MHz, CDCl<sub>3</sub>) δ 8.54 (dd, *J* = 8.8, 5.8 Hz, 1H), 8.37 – 8.30 (m, 1H), 7.85 – 7.79 (m, 1H), 7.50 – 7.40 (m, 2H), 7.29 – 7.21 (m, 1H), 7.16 (dd, *J* = 9.5, 2.5 Hz, 1H), 3.56 – 3.39 (m, 1H), 2.96 – 2.79 (m, 1H), 1.77 (s, 3H). <sup>13</sup>C NMR (100 MHz, CDCl<sub>3</sub>) δ 170.5, 164.9 (d, <sup>1</sup>*J*<sub>C-F</sub> = 252.0 Hz), 148.6, 144.0, 141.3 (d, <sup>3</sup>*J*<sub>C-F</sub> = 8.0 Hz), 131.4, 129.1 (d, <sup>3</sup>*J*<sub>C-F</sub> = 9.0 Hz), 126.4, 126.1, 124.9 (q, <sup>1</sup>*J*<sub>C-CF<sub>3</sub></sub> = 277.0 Hz), 120.1, 119.1 (d, <sup>4</sup>*J*<sub>C-F</sub> = 3.0 Hz), 116.7 (d, <sup>2</sup>*J*<sub>C-F</sub> = 22.0 Hz), 115.8, 113.7 (d, <sup>2</sup>*J*<sub>C-F</sub> = 23.0 Hz), 45.6 (q, <sup>3</sup>*J*<sub>C-CF<sub>3</sub></sub> = 2.0 Hz; d, <sup>4</sup>*J*<sub>C-F</sub> = 2.0 Hz), 44.2 (q, <sup>2</sup>*J*<sub>C-CF<sub>3</sub></sub> = 27.7 Hz), 31.0. <sup>19</sup>F NMR (376 MHz, CDCl<sub>3</sub>) δ -61.42, -106.14. Spectroscopic data are in accordance with those described in the literature.<sup>[1]</sup>

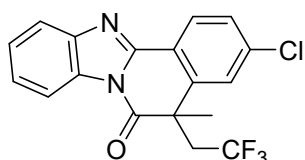

### 3-chloro-5-methyl-5-(2,2,2-trifluoroethyl)benzo[4,5]imidazo[2,1-a]isoquinolin-6(5H)-one (3c)

White solid; m.p. = 202.1-203.9°C. <sup>1</sup>H NMR (400 MHz, CDCl<sub>3</sub>) δ 8.46 (d, *J* = 8.5 Hz, 1H), 8.38 – 8.31 (m, 1H), 7.86 – 7.79 (m, 1H), 7.51 (dd, *J* = 8.5, 1.9 Hz, 1H), 7.49 – 7.42 (m, 3H), 3.57 – 3.37 (m, 1H), 2.99 – 2.80 (m, 1H), 1.77 (s, 3H). <sup>13</sup>C NMR (100 MHz, CDCl<sub>3</sub>) δ 170.4, 148.4, 144.1, 140.3, 138.1, 131.5, 129.3, 127.9, 126.9, 126.5, 126.3, 124.9 (q, <sup>1</sup>*J*<sub>C-CF<sub>3</sub></sub> = 277.0 Hz), 121.2, 120.2,

115.9, 45.4 (q,  $^3J_{C-CF_3} = 2.3$  Hz), 44.2 (q,  $^2J_{C-CF_3} = 28.0$  Hz), 30.9.  $^{19}F$  NMR (376 MHz,  $CDCl_3$ )  $\delta$  -61.38. Spectroscopic data are in accordance with those described in the literature.<sup>[1]</sup>

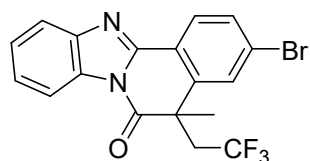

**3-bromo-5-methyl-5-(2,2,2-trifluoroethyl)benzo[4,5]imidazo[2,1-*a*]isoquinolin-6(5*H*)-one (3d)**

White solid; m.p. = 238.1-239.6°C.  $^1H$  NMR (400 MHz,  $CDCl_3$ )  $\delta$  8.38 (d,  $J = 8.4$  Hz, 1H), 8.37 – 8.31 (m, 1H), 7.87 – 7.79 (m, 1H), 7.67 (dd,  $J = 8.4, 1.8$  Hz, 1H), 7.61 (d,  $J = 1.8$  Hz, 1H), 7.51 – 7.41 (m, 2H), 3.57 – 3.38 (m, 1H), 3.00 – 2.78 (m, 1H), 1.77 (s, 3H).  $^{13}C$  NMR (100 MHz,  $CDCl_3$ )  $\delta$  170.3, 148.5, 144.0, 140.3, 132.1, 131.4, 129.8, 127.9, 126.5, 126.4, 126.3, 124.9 (q,  $^1J_{C-CF_3} = 277.0$  Hz), 121.6, 120.2, 115.8, 45.3 (q,  $^3J_{C-CF_3} = 2.0$  Hz), 44.1 (q,  $^2J_{C-CF_3} = 27.7$  Hz), 30.9.  $^{19}F$  NMR (376 MHz,  $CDCl_3$ )  $\delta$  -61.36. Spectroscopic data are in accordance with those described in the literature.<sup>[1]</sup>

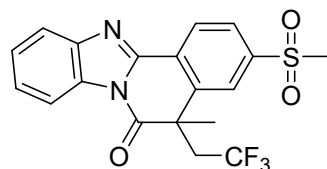

**5-methyl-3-(methylsulfonyl)-5-(2,2,2-trifluoroethyl)benzo[4,5]imidazo[2,1-*a*]isoquinolin-6(5*H*)-one (3e)**

White solid; m.p. = 226.5-227.2°C.  $^1H$  NMR (400 MHz,  $CDCl_3$ )  $\delta$  8.74 (d,  $J = 8.0$  Hz, 1H), 8.43 – 8.32 (m, 1H), 8.16 – 8.01 (m, 2H), 7.93 – 7.81 (m, 1H), 7.56 – 7.43 (m, 2H), 3.66 – 3.47 (m, 1H), 3.12 (s, 3H), 3.08 – 2.95 (m, 1H), 1.81 (s, 3H).  $^{13}C$  NMR (100 MHz,  $CDCl_3$ )  $\delta$  167.0, 144.0, 143.0, 139.7, 131.5, 127.7, 127.3, 127.3, 127.8, 126.8, 126.2, 124.9 (q,  $^1J_{C-CF_3} = 277.0$  Hz), 120.7, 116.0, 45.7 (q,  $^3J_{C-CF_3} = 2.0$  Hz), 44.7, 43.7 (q,  $^2J_{C-CF_3} = 27.7$  Hz), 30.9.  $^{19}F$  NMR (376 MHz,  $CDCl_3$ )  $\delta$  -61.19. HRMS (ESI)  $m/z$  calculated for  $C_{19}H_{16}F_3N_2O_3S^+$ : 409.0828, found: 409.0845.

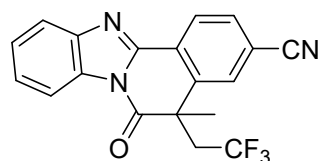

**5-methyl-6-oxo-5-(2,2,2-trifluoroethyl)-5,6-dihydrobenzo[4,5]imidazo[2,1-*a*]isoquinoline-3-carbonitrile (3f)**

White solid; m.p. = 258.5-259.6°C.  $^1H$  NMR (400 MHz,  $CDCl_3$ )  $\delta$  8.64 (d,  $J = 8.1$  Hz, 1H), 8.40 – 8.32 (m, 1H), 7.90 – 7.84 (m, 1H), 7.82 – 7.77 (m, 2H), 7.54 – 7.47 (m, 2H), 3.60 – 3.44 (m, 1H), 3.01 – 2.85 (m, 1H), 1.80 (s, 3H).  $^{13}C$  NMR (100 MHz,  $CDCl_3$ )  $\delta$  169.8, 147.3, 144.1, 139.5, 131.7, 131.5, 130.8, 127.3, 127.1, 126.8, 126.6, 126.2 (q,  $^1J_{C-CF_3} = 277.0$  Hz), 120.7, 117.9, 116.0, 115.2, 45.4 (q,  $^3J_{C-CF_3} = 2.0$  Hz), 44.4 (q,  $^2J_{C-CF_3} = 28.0$  Hz), 30.8.  $^{19}F$  NMR (376 MHz,  $CDCl_3$ )  $\delta$  -61.34. Spectroscopic data are in accordance with those described in the literature.<sup>[1]</sup>

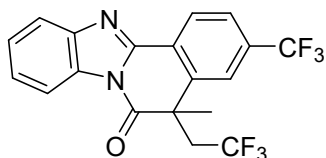

**5-methyl-5-(2,2,2-trifluoroethyl)-3-(trifluoromethyl)benzo[4,5]imidazo[2,1-*a*]isoquinolin-6(5*H*)-one (3g)**

White solid; m.p. = 163.7-164.6°C. <sup>1</sup>H NMR (400 MHz, CDCl<sub>3</sub>) δ 8.66 (d, *J* = 8.2 Hz, 1H), 8.41 – 8.33 (m, 1H), 7.90 – 7.83 (m, 1H), 7.78 (d, *J* = 8.3 Hz, 1H), 7.71 (s, 1H), 7.55 – 7.43 (m, 2H), 3.60 – 3.44 (m, 1H), 3.05 – 2.89 (m, 1H), 1.80 (s, 3H). <sup>13</sup>C NMR (100 MHz, CDCl<sub>3</sub>) δ 170.2, 147.8, 144.1, 139.2, 133.4 (q, <sup>2</sup>*J*<sub>C-CF<sub>3</sub></sub> = 32.7 Hz), 131.6, 127.2, 126.7, 126.7, 125.9, 125.5 (q, <sup>3</sup>*J*<sub>C-CF<sub>3</sub></sub> = 3.3 Hz), 124.9 (q, <sup>1</sup>*J*<sub>C-CF<sub>3</sub></sub> = 277.0 Hz), 123.8 (q, <sup>4</sup>*J*<sub>C-CF<sub>3</sub></sub> = 3.3 Hz), 123.6 (q, <sup>1</sup>*J*<sub>C-CF<sub>3</sub></sub> = 271.0 Hz), 120.5, 116.0, 45.6 (q, <sup>3</sup>*J*<sub>C-CF<sub>3</sub></sub> = 2.0 Hz), 44.1 (q, <sup>2</sup>*J*<sub>C-CF<sub>3</sub></sub> = 27.7 Hz), 30.9. <sup>19</sup>F NMR (376 MHz, CDCl<sub>3</sub>) δ -61.41, -63.03. Spectroscopic data are in accordance with those described in the literature.<sup>[1]</sup>

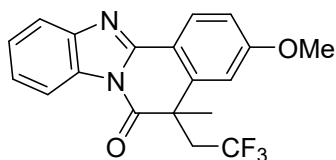

**3-methoxy-5-methyl-5-(2,2,2-trifluoroethyl)benzo[4,5]imidazo[2,1-*a*]isoquinolin-6(5*H*)-one (3h)**

White solid; m.p. = 150.1-151.3°C. <sup>1</sup>H NMR (400 MHz, CDCl<sub>3</sub>) δ 8.46 (d, *J* = 8.8 Hz, 1H), 8.35 – 8.29 (m, 1H), 7.81 – 7.76 (m, 1H), 7.47 – 7.35 (m, 2H), 7.07 (dd, *J* = 8.8, 2.4 Hz, 1H), 6.93 (d, *J* = 2.4 Hz, 1H), 3.92 (s, 3H), 3.54 – 3.37 (m, 1H), 2.98 – 2.81 (m, 1H), 1.75 (s, 3H). <sup>13</sup>C NMR (100 MHz, CDCl<sub>3</sub>) δ 171.1, 162.6, 149.6, 144.3, 140.7, 131.5, 128.5, 126.2, 125.5, 125.1 (q, <sup>1</sup>*J*<sub>C-CF<sub>3</sub></sub> = 277.0 Hz), 119.7, 115.7, 115.4, 114.2, 112.6, 55.8, 45.6 (q, <sup>3</sup>*J*<sub>C-CF<sub>3</sub></sub> = 2.0 Hz), 44.2 (q, <sup>2</sup>*J*<sub>C-CF<sub>3</sub></sub> = 27.8 Hz), 31.2. <sup>19</sup>F NMR (376 MHz, CDCl<sub>3</sub>) δ -61.28. Spectroscopic data are in accordance with those described in the literature.<sup>[1]</sup>

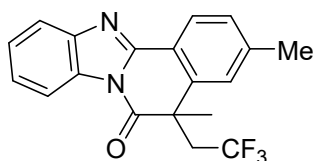

**3,5-dimethyl-5-(2,2,2-trifluoroethyl)benzo[4,5]imidazo[2,1-*a*]isoquinolin-6(5*H*)-one (3i)**

White solid; m.p. = 203.1-203.8°C. <sup>1</sup>H NMR (400 MHz, CDCl<sub>3</sub>) δ 8.40 (d, *J* = 8.0 Hz, 1H), 8.37 – 8.31 (m, 1H), 7.85 – 7.78 (m, 1H), 7.49 – 7.38 (m, 2H), 7.34 (d, *J* = 8.1 Hz, 1H), 7.25 (s, 1H), 3.55 – 3.37 (m, 1H), 3.01 – 2.84 (m, 1H), 2.48 (s, 3H), 1.75 (s, 3H). <sup>13</sup>C NMR (100 MHz, CDCl<sub>3</sub>) δ 171.3, 149.6, 144.1, 142.5, 138.6, 131.4, 129.7, 127.0, 126.4, 126.2, 125.7, 125.1 (q, <sup>1</sup>*J*<sub>C-CF<sub>3</sub></sub> = 277.0 Hz), 119.9, 119.8, 115.8, 45.3 (q, <sup>3</sup>*J*<sub>C-CF<sub>3</sub></sub> = 2.0 Hz), 44.0 (q, <sup>2</sup>*J*<sub>C-CF<sub>3</sub></sub> = 27.7 Hz), 31.1, 22.1. <sup>19</sup>F NMR (376 MHz, CDCl<sub>3</sub>) δ -61.34. Spectroscopic data are in accordance with those described in the literature.<sup>[1]</sup>

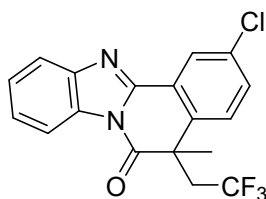

**2-chloro-5-methyl-5-(2,2,2-trifluoroethyl)benzo[4,5]imidazo[2,1-*a*]isoquinolin-6(5*H*)-one (3j)**

White solid; m.p. = 166.2-167.3°C. <sup>1</sup>H NMR (400 MHz, CDCl<sub>3</sub>) δ 8.52 (d, *J* = 2.3 Hz, 1H), 8.39 – 8.31 (m, 1H), 7.88 – 7.80 (m, 1H), 7.55 (dd, *J* = 8.5, 2.3 Hz, 1H), 7.52 – 7.43 (m, 2H), 7.41 (d, *J* = 8.6 Hz, 1H), 3.56 – 3.40 (m, 1H), 2.90 (m, 1H), 1.75 (s, 3H). <sup>13</sup>C NMR (100 MHz, CDCl<sub>3</sub>) δ 170.6, 148.0, 143.9, 136.8, 134.9, 131.9, 131.5, 128.2, 126.5, 126.4, 126.2, 124.9 (q, <sup>1</sup>*J*<sub>C-CF<sub>3</sub></sub> = 277.0 Hz), 124.1, 120.3, 115.9, 45.2 (q, <sup>3</sup>*J*<sub>C-CF<sub>3</sub></sub> = 2.0 Hz), 44.0 (q, <sup>2</sup>*J*<sub>C-CF<sub>3</sub></sub> = 27.7 Hz), 31.0. <sup>19</sup>F NMR (376 MHz, CDCl<sub>3</sub>) δ -61.31. Spectroscopic data are in accordance with those described in the literature.<sup>[1]</sup>

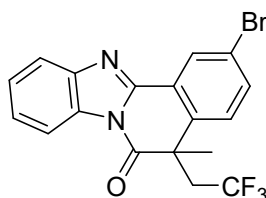

**2-bromo-5-methyl-5-(2,2,2-trifluoroethyl)benzo[4,5]imidazo[2,1-*a*]isoquinolin-6(5*H*)-one (3k)**

White solid; m.p. = 169.0-170.8°C. <sup>1</sup>H NMR (400 MHz, CDCl<sub>3</sub>) δ 8.69 (d, *J* = 2.1 Hz, 1H), 8.38 – 8.31 (m, 1H), 7.88 – 7.80 (m, 1H), 7.70 (dd, *J* = 8.5, 2.2 Hz, 1H), 7.51 – 7.43 (m, 2H), 7.34 (d, *J* = 8.5 Hz, 1H), 3.56 – 3.39 (m, 1H), 2.98 – 2.82 (m, 1H), 1.75 (s, 3H). <sup>13</sup>C NMR (100 MHz, CDCl<sub>3</sub>) δ 170.5, 147.9, 144.0, 137.3, 134.7, 131.5, 129.2, 128.3, 126.5, 126.4, 125.0 (q, <sup>1</sup>*J*<sub>C-CF<sub>3</sub></sub> = 277.0 Hz), 124.4, 122.8, 120.3, 115.9, 45.3 (q, <sup>3</sup>*J*<sub>C-CF<sub>3</sub></sub> = 2.0 Hz), 44.0 (q, <sup>2</sup>*J*<sub>C-CF<sub>3</sub></sub> = 27.7 Hz), 30.9. <sup>19</sup>F NMR (376 MHz, CDCl<sub>3</sub>) δ -61.29. HRMS (ESI) *m/z* calculated for C<sub>18</sub>H<sub>13</sub>BrF<sub>3</sub>N<sub>2</sub>O<sup>+</sup> : 409.0158, found : 409.0173.

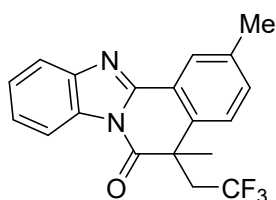

**2,5-dimethyl-5-(2,2,2-trifluoroethyl)benzo[4,5]imidazo[2,1-*a*]isoquinolin-6(5*H*)-one (3l)**

White solid; m.p. = 131.2-131.6°C. <sup>1</sup>H NMR (400 MHz, CDCl<sub>3</sub>) δ 8.38 – 8.32 (m, 2H), 7.86 – 7.80 (m, 1H), 7.49 – 7.43 (m, 2H), 7.41 (d, *J* = 7.8 Hz, 1H), 7.35 (d, *J* = 8.1 Hz, 1H), 3.54 – 3.36 (m, 1H), 3.00 – 2.84 (m, 1H), 2.48 (s, 3H), 1.73 (s, 3H). <sup>13</sup>C NMR (100 MHz, CDCl<sub>3</sub>) δ 171.4, 149.6, 144.0, 138.7, 135.7, 132.9, 131.5, 126.6, 126.5, 126.3, 125.9, 125.1 (q, <sup>1</sup>*J*<sub>C-CF<sub>3</sub></sub> = 277.0 Hz), 122.1, 120.0, 115.8, 45.2 (q, <sup>3</sup>*J*<sub>C-CF<sub>3</sub></sub> = 2.0 Hz), 44.0 (q, <sup>2</sup>*J*<sub>C-CF<sub>3</sub></sub> = 27.3 Hz), 31.1, 21.1. <sup>19</sup>F NMR (376 MHz, CDCl<sub>3</sub>) δ -61.32. Spectroscopic data are in accordance with those described in the literature.<sup>[1]</sup>

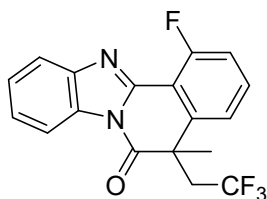

**1-fluoro-5-methyl-5-(2,2,2-trifluoroethyl)benzo[4,5]imidazo[2,1-a]isoquinolin-6(5H)-one (3m)**

White solid; m.p. = 177.8-178.5°C. <sup>1</sup>H NMR (400 MHz, CDCl<sub>3</sub>) δ 8.41 – 8.34 (m, 1H), 7.99 – 7.92 (m, 1H), 7.61 – 7.53 (m, 1H), 7.51 – 7.44 (m, 2H), 7.33 – 7.26 (m, 2H), 3.57 – 3.41 (m, 1H), 3.02 – 2.86 (m, 1H), 1.78 (s, 3H). <sup>13</sup>C NMR (100 MHz, CDCl<sub>3</sub>) δ 170.5, 160.7 (d, <sup>1</sup>J<sub>C-F</sub> = 261.0 Hz), 145.4 (d, <sup>3</sup>J<sub>C-F</sub> = 8.0 Hz), 144.3 (d, <sup>4</sup>J<sub>C-F</sub> = 2.0 Hz), 141.0, 132.5 (d, <sup>3</sup>J<sub>C-F</sub> = 10.0 Hz), 130.5, 126.6, 126.5, 125.0 (q, <sup>1</sup>J<sub>C-CF<sub>3</sub></sub> = 277.0 Hz), 122.6 (d, <sup>3</sup>J<sub>C-F</sub> = 8.0 Hz), 120.9, 116.5 (d, <sup>2</sup>J<sub>C-F</sub> = 22.0 Hz), 115.8, 112.0 (d, <sup>2</sup>J<sub>C-F</sub> = 10.0 Hz), 45.3 (q, <sup>3</sup>J<sub>C-CF<sub>3</sub></sub> = 2.0 Hz; d, <sup>4</sup>J<sub>C-F</sub> = 2.0 Hz), 44.4 (q, <sup>2</sup>J<sub>C-CF<sub>3</sub></sub> = 27.7 Hz), 31.3. <sup>19</sup>F NMR (376 MHz, CDCl<sub>3</sub>) δ -61.27, -106.21. Spectroscopic data are in accordance with those described in the literature.<sup>[1]</sup>

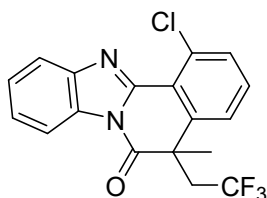

**1-chloro-5-methyl-5-(2,2,2-trifluoroethyl)benzo[4,5]imidazo[2,1-a]isoquinolin-6(5H)-one (3n)**

White solid; m.p. = 210.4-211.3°C. <sup>1</sup>H NMR (400 MHz, CDCl<sub>3</sub>) δ 8.42 – 8.35 (m, 1H), 7.98 – 7.91 (m, 1H), 7.62 (dd, *J* = 7.7, 1.4 Hz, 1H), 7.51 – 7.45 (m, 3H), 7.42 (dd, *J* = 8.0, 1.4 Hz, 1H), 3.50 (m, 1H), 2.93 (m, 1H), 1.77 (s, 3H). <sup>13</sup>C NMR (100 MHz, CDCl<sub>3</sub>) δ 170.3, 146.7, 144.0, 141.3, 134.1, 132.2, 130.9, 130.6, 126.7, 126.3, 125.5, 125.0 (q, <sup>1</sup>J<sub>C-CF<sub>3</sub></sub> = 277.3 Hz), 121.0, 120.7, 115.8, 45.6 (q, <sup>3</sup>J<sub>C-CF<sub>3</sub></sub> = 2.0 Hz), 43.3 (q, <sup>2</sup>J<sub>C-CF<sub>3</sub></sub> = 27.7 Hz), 31.5. <sup>19</sup>F NMR (376 MHz, CDCl<sub>3</sub>) δ -61.17. HRMS (ESI) *m/z* calculated for C<sub>18</sub>H<sub>13</sub>ClF<sub>3</sub>N<sub>2</sub>O<sup>+</sup> : 365.0679, found : 365.0685.

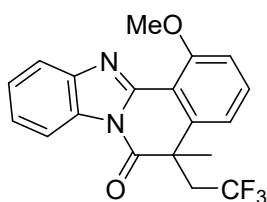

**1-methoxy-5-methyl-5-(2,2,2-trifluoroethyl)benzo[4,5]imidazo[2,1-a]isoquinolin-6(5H)-one (3o)**

White solid; m.p. = 193.5-194.7°C. <sup>1</sup>H NMR (400 MHz, CDCl<sub>3</sub>) δ 8.43 – 8.29 (m, 1H), 7.96 – 7.86 (m, 1H), 7.53 (t, *J* = 8.2 Hz, 1H), 7.47 – 7.37 (m, 2H), 7.09 (dd, *J* = 8.2, 2.9 Hz, 2H), 4.14 (s, 3H), 3.54 – 3.37 (m, 1H), 2.99 – 2.84 (m, 1H), 1.76 (s, 3H). <sup>13</sup>C NMR (100 MHz, CDCl<sub>3</sub>) δ 171.0, 159.0, 147.5, 144.4, 141.1, 132.2, 130.4, 126.0, 126.0, 125.0 (q, <sup>1</sup>J<sub>C-CF<sub>3</sub></sub> = 277.0 Hz), 120.7, 118.9, 115.6, 111.8, 111.1, 56.8, 45.2 (q, <sup>3</sup>J<sub>C-CF<sub>3</sub></sub> = 2.3 Hz), 44.4 (q, <sup>2</sup>J<sub>C-CF<sub>3</sub></sub> = 27.3 Hz), 31.4. <sup>19</sup>F NMR (376 MHz, CDCl<sub>3</sub>) δ -61.28. Spectroscopic data are in accordance with those described in the literature.<sup>[1]</sup>



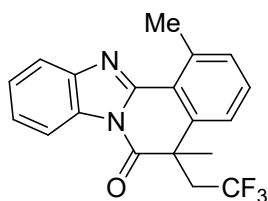

**1,5-dimethyl-5-(2,2,2-trifluoroethyl)benzo[4,5]imidazo[2,1-a]isoquinolin-6(5H)-one (3p)**

White solid; m.p. = 166.6-168.3°C. <sup>1</sup>H NMR (400 MHz, CDCl<sub>3</sub>) δ 8.43 – 8.35 (m, 1H), 7.89 – 7.81 (m, 1H), 7.50 – 7.40 (m, 3H), 7.39 – 7.31 (m, 2H), 3.59 – 3.36 (m, 1H), 3.07 (s, 3H), 3.01 – 2.87 (m, 1H), 1.76 (s, 3H). <sup>13</sup>C NMR (100 MHz, CDCl<sub>3</sub>) δ 171.3, 149.6, 144.4, 140.4, 139.7, 131.9, 130.7, 130.4, 126.0, 125.2 (q, <sup>1</sup>J<sub>C-CF<sub>3</sub></sub> = 277.0 Hz), 124.5, 121.2, 120.4, 115.9, 45.4 (q, <sup>3</sup>J<sub>C-CF<sub>3</sub></sub> = 2.3 Hz), 44.4 (q, <sup>2</sup>J<sub>C-CF<sub>3</sub></sub> = 27.3 Hz), 31.6, 24.9. <sup>19</sup>F NMR (376 MHz, CDCl<sub>3</sub>) δ -61.21. Spectroscopic data are in accordance with those described in the literature.<sup>[1]</sup>

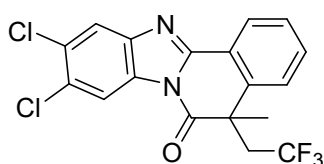

**9,10-dichloro-5-methyl-5-(2,2,2-trifluoroethyl)benzo[4,5]imidazo[2,1-a]isoquinolin-6(5H)-one (3q)**

White solid; m.p. = 162.3-163.5°C. <sup>1</sup>H NMR (400 MHz, CDCl<sub>3</sub>) δ 8.50 – 8.45 (m, 2H), 7.90 (s, 1H), 7.64 (t, *J* = 7.6 Hz, 1H), 7.54 (t, *J* = 7.6 Hz, 1H), 7.48 (d, *J* = 7.8 Hz, 1H), 3.53 – 3.37 (m, 1H), 3.03 – 2.86 (m, 1H), 1.77 (s, 3H). <sup>13</sup>C NMR (100 MHz, CDCl<sub>3</sub>) δ 170.9, 150.9, 143.6, 138.7, 132.4, 130.5, 130.4, 129.9, 128.8, 126.7, 126.7, 124.9 (q, <sup>1</sup>J<sub>C-CF<sub>3</sub></sub> = 277.0 Hz), 121.9, 121.3, 117.2, 45.4 (q, <sup>3</sup>J<sub>C-CF<sub>3</sub></sub> = 2.0 Hz), 44.2 (q, <sup>2</sup>J<sub>C-CF<sub>3</sub></sub> = 27.7 Hz), 31.0. <sup>19</sup>F NMR (376 MHz, CDCl<sub>3</sub>) δ -61.42. HRMS (ESI) *m/z* calculated for C<sub>18</sub>H<sub>12</sub>Cl<sub>2</sub>F<sub>3</sub>N<sub>2</sub>O<sup>+</sup> : 399.0273, found : 399.0285.

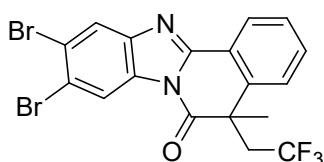

**9,10-dibromo-5-methyl-5-(2,2,2-trifluoroethyl)benzo[4,5]imidazo[2,1-a]isoquinolin-6(5H)-one (3r)**

White solid; m.p. = 193.2-194.1°C. <sup>1</sup>H NMR (400 MHz, CDCl<sub>3</sub>) δ 8.67 (s, 1H), 8.49 (d, *J* = 7.8 Hz, 1H), 8.09 (s, 1H), 7.64 (t, *J* = 7.7 Hz, 1H), 7.54 (t, *J* = 7.0 Hz, 1H), 7.49 (d, *J* = 7.9 Hz, 1H), 3.54 – 3.34 (m, 1H), 3.06 – 2.83 (m, 1H), 1.77 (s, 3H). <sup>13</sup>C NMR (100 MHz, CDCl<sub>3</sub>) δ 171.0, 150.8, 144.4, 138.7, 132.5, 131.3, 128.8, 126.8, 126.7, 124.9 (q, <sup>1</sup>J<sub>C-CF<sub>3</sub></sub> = 277.3 Hz), 124.5, 122.0, 121.8, 121.4, 120.3, 44.4 (q, <sup>3</sup>J<sub>C-CF<sub>3</sub></sub> = 2.0 Hz), 44.2 (q, <sup>2</sup>J<sub>C-CF<sub>3</sub></sub> = 27.7 Hz), 31.0. <sup>19</sup>F NMR (376 MHz, CDCl<sub>3</sub>) δ -61.41. HRMS (ESI) *m/z* calculated for C<sub>18</sub>H<sub>12</sub>Br<sub>2</sub>F<sub>3</sub>N<sub>2</sub>O<sup>+</sup> : 486.9263, found : 486.9265.

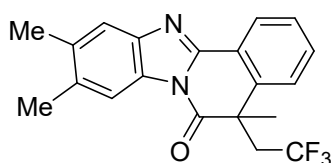

**5,9,10-trimethyl-5-(2,2,2-trifluoroethyl)benzo[4,5]imidazo[2,1-a]isoquinolin-6(5H)-one (3s)**

White solid; m.p. = 167.5-168.1°C. <sup>1</sup>H NMR (400 MHz, CDCl<sub>3</sub>) δ 8.50 (d, *J* = 7.8 Hz, 1H), 8.14 (s, 1H), 7.62 – 7.54 (m, 2H), 7.51 (t, *J* = 7.5 Hz, 1H), 7.46 (d, *J* = 7.8 Hz, 1H), 3.57 – 3.36 (m, 1H), 3.03 – 2.84 (m, 1H), 2.42 (d, *J* = 6.7 Hz, 6H), 1.75 (s, 3H). <sup>13</sup>C NMR (100 MHz, CDCl<sub>3</sub>) δ 171.1, 148.6, 142.4, 138.3, 135.4, 135.4, 131.5, 129.8, 128.5, 126.6, 126.3, 125.1 (q, <sup>1</sup>*J*<sub>C-CF<sub>3</sub></sub> = 277.3 Hz), 122.7, 120.2, 116.1, 45.3 (q, <sup>3</sup>*J*<sub>C-CF<sub>3</sub></sub> = 2.0 Hz), 44.0 (q, <sup>2</sup>*J*<sub>C-CF<sub>3</sub></sub> = 27.7 Hz), 31.1, 20.7, 20.6. <sup>19</sup>F NMR (376 MHz, CDCl<sub>3</sub>) δ -61.41. HRMS (ESI) *m/z* calculated for C<sub>20</sub>H<sub>18</sub>F<sub>3</sub>N<sub>2</sub>O<sup>+</sup> : 359.1366, found : 359.1369.

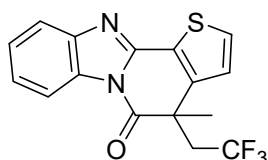

**4-methyl-4-(2,2,2-trifluoroethyl)benzo[4,5]imidazo[1,2-*a*]thieno[2,3-*c*]pyridin-5(4*H*)-one (3t)**

White solid; m.p. = 161.0-162.5°C. <sup>1</sup>H NMR (400 MHz, CDCl<sub>3</sub>) δ 8.36 – 8.27 (m, 1H), 7.84 – 7.75 (m, 1H), 7.66 (d, *J* = 5.1 Hz, 1H), 7.49 – 7.39 (m, 2H), 7.12 (d, *J* = 5.1 Hz, 1H), 3.50 – 3.32 (m, 1H), 2.93 – 2.73 (m, 1H), 1.73 (s, 3H). <sup>13</sup>C NMR (100 MHz, CDCl<sub>3</sub>) δ 171.6, 146.2, 144.3, 143.9, 131.2, 130.9, 126.3, 126.0, 125.6, 124.9 (q, <sup>1</sup>*J*<sub>C-CF<sub>3</sub></sub> = 277.0 Hz), 124.1, 119.9, 115.4, 45.3 (q, <sup>3</sup>*J*<sub>C-CF<sub>3</sub></sub> = 2.0 Hz), 44.1 (q, <sup>2</sup>*J*<sub>C-CF<sub>3</sub></sub> = 28.0 Hz), 29.8. <sup>19</sup>F NMR (376 MHz, CDCl<sub>3</sub>) δ -62.12. Spectroscopic data are in accordance with those described in the literature.<sup>[1]</sup>

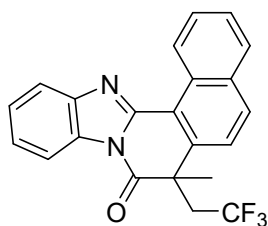

**7-methyl-7-(2,2,2-trifluoroethyl)benzo[*h*]benzo[4,5]imidazo[2,1-*a*]isoquinolin-8(7*H*)-one (3u)**

White solid; m.p. = 236.7-237.9°C. <sup>1</sup>H NMR (400 MHz, CDCl<sub>3</sub>) δ 10.55 (d, *J* = 8.9 Hz, 1H), 8.49 – 8.40 (m, 1H), 8.05 (d, *J* = 8.8 Hz, 1H), 8.00 – 7.89 (m, 2H), 7.88 – 7.79 (m, 1H), 7.66 (t, *J* = 7.6 Hz, 1H), 7.59 – 7.43 (m, 3H), 3.66 – 3.46 (m, 1H), 3.15 – 2.98 (m, 1H), 1.82 (s, 3H). <sup>13</sup>C NMR (100 MHz, CDCl<sub>3</sub>) δ 171.3, 149.6, 144.2, 139.0, 133.1, 132.7, 130.5, 129.1, 128.6, 128.4, 127.5, 127.3, 126.3, 126.2, 125.1 (q, <sup>1</sup>*J*<sub>C-CF<sub>3</sub></sub> = 276.7 Hz), 123.2, 120.4, 118.0, 115.9, 45.7 (q, <sup>3</sup>*J*<sub>C-CF<sub>3</sub></sub> = 2.0 Hz), 43.8 (q, <sup>2</sup>*J*<sub>C-CF<sub>3</sub></sub> = 27.3 Hz), 31.0. <sup>19</sup>F NMR (376 MHz, CDCl<sub>3</sub>) δ -61.58. HRMS (ESI) *m/z* calculated for C<sub>22</sub>H<sub>16</sub>F<sub>3</sub>N<sub>2</sub>O<sup>+</sup> : 381.1209, found : 381.1218.

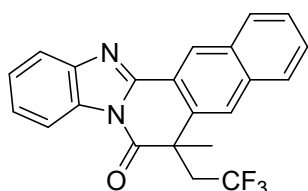

**7-methyl-7-(2,2,2-trifluoroethyl)benzo[*g*]benzo[4,5]imidazo[2,1-*a*]isoquinolin-6(7*H*)-one (3v)**

White solid; m.p. = 213.7-215.2°C. <sup>1</sup>H NMR (400 MHz, CDCl<sub>3</sub>) δ 8.67 (d, *J* = 8.6 Hz, 1H), 8.42 – 8.37 (m, 1H), 8.35 (d, *J* = 8.5 Hz, 1H), 8.01 (d, *J* = 8.6 Hz, 1H), 7.98 (d, *J* = 7.9 Hz, 1H), 7.91 – 7.84 (m, 1H), 7.69 – 7.57 (m, 2H), 7.54 – 7.43 (m, 2H), 3.91 – 3.77 (m, 1H), 3.76 – 3.62 (m, 1H),

2.18 (s, 3H).  $^{13}\text{C}$  NMR (100 MHz,  $\text{CDCl}_3$ )  $\delta$  172.6, 149.9, 144.4, 136.2, 134.4, 131.3, 130.8, 130.6, 130.5, 127.3, 127.2, 126.5, 126.1, 125.2 (q,  $^1J_{\text{C-F}} = 277.3$  Hz), 125.2, 122.8, 121.4, 120.1, 115.8, 46.9 (q,  $^3J_{\text{C-F}} = 2.0$  Hz), 43.3 (q,  $^2J_{\text{C-F}} = 27.7$  Hz), 28.4.  $^{19}\text{F}$  NMR (376 MHz,  $\text{CDCl}_3$ )  $\delta$  -62.66. HRMS (ESI)  $m/z$  calculated for  $\text{C}_{22}\text{H}_{16}\text{F}_3\text{N}_2\text{O}^+$  : 381.1209, found : 381.1218.

### Copies of NMR spectra: $^1\text{H}$ -, $^{13}\text{C}$ - and $^{19}\text{F}$ -NMR spectra

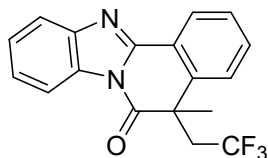

**3a**

#### $^1\text{H}$ NMR

YZC-CF3模板重打F. 1. fid

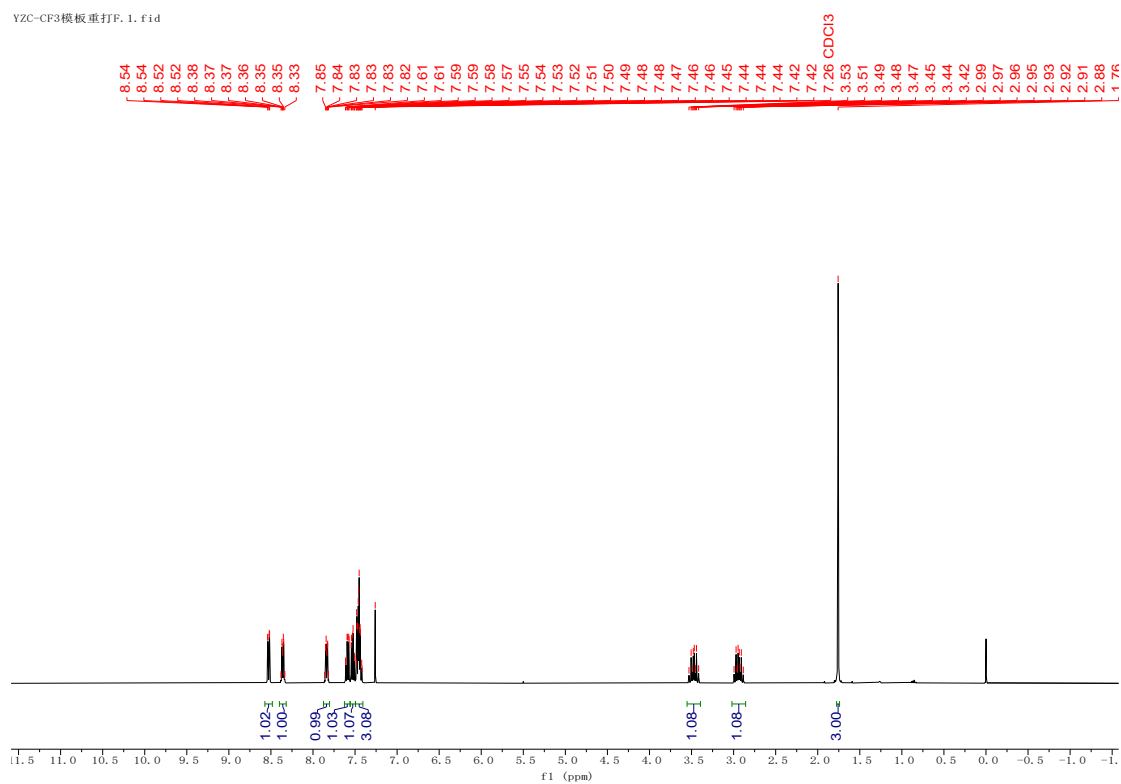

#### $^{13}\text{C}$ NMR

YZC-CF3模板重打F. 2. fid

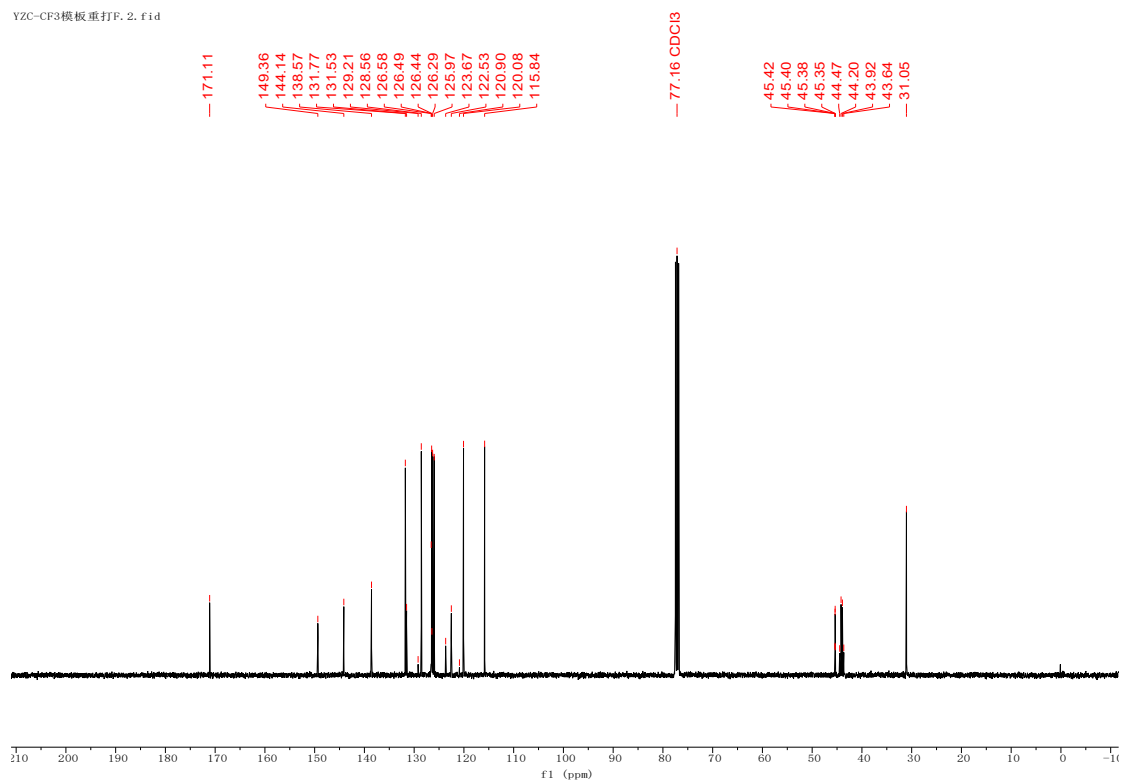

### <sup>19</sup>F NMR

3a. 3. fid

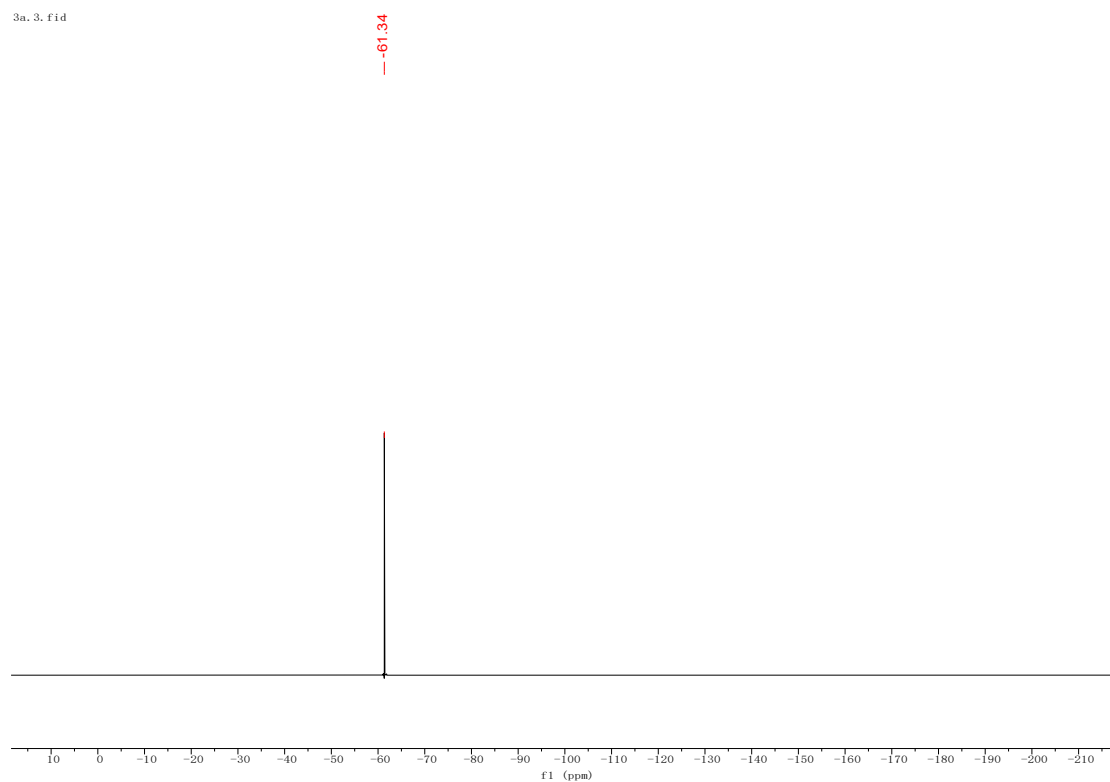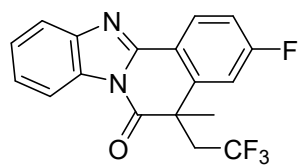

3b

# <sup>1</sup>H NMR

YZC-4F-2.1.fid

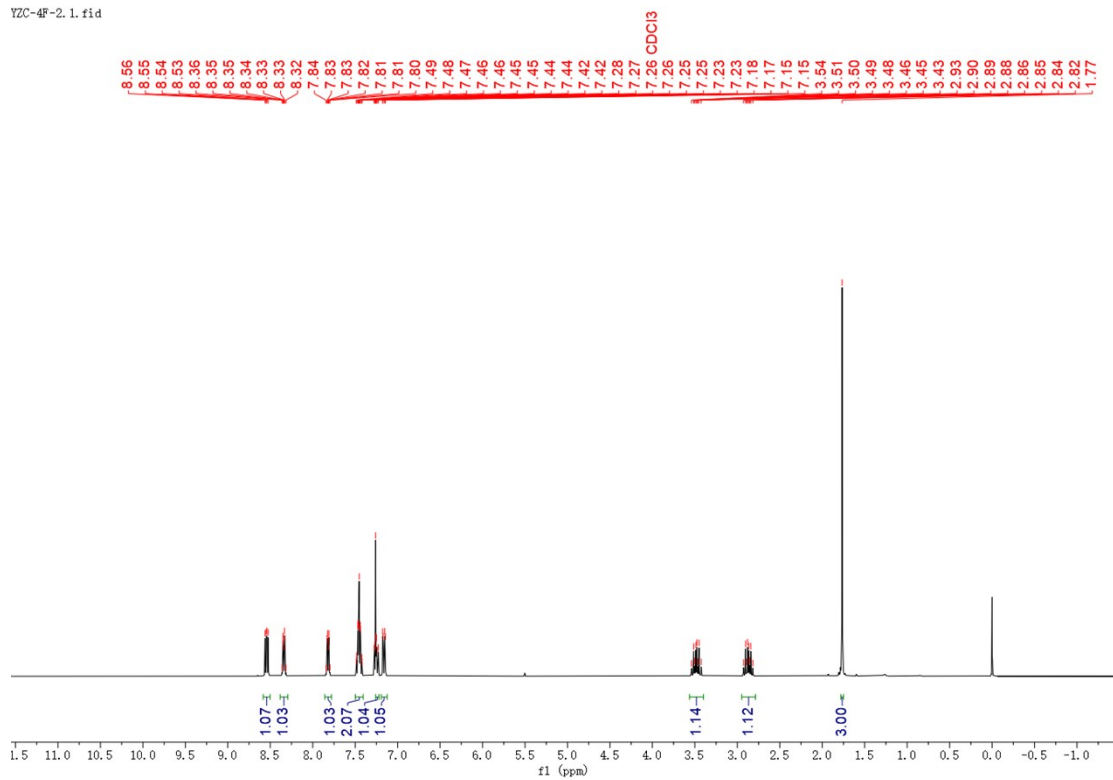

# <sup>13</sup>C NMR

YZC-4F-2.2.fid

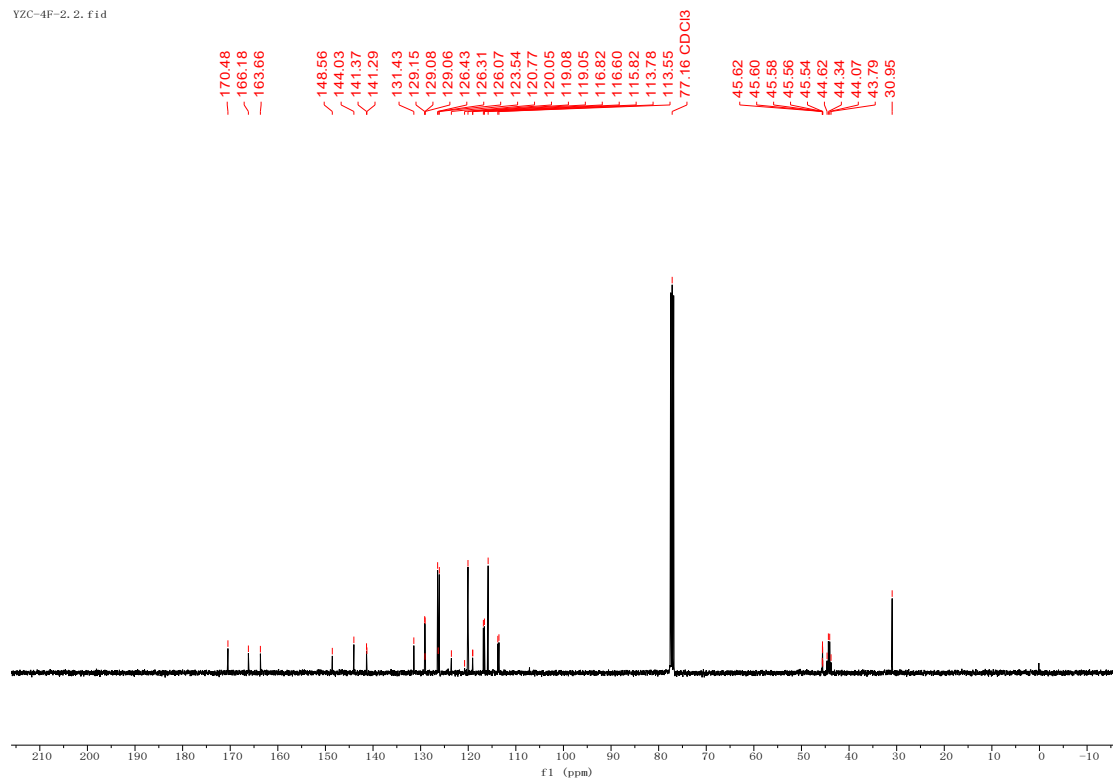

# <sup>19</sup>F NMR

YZC-4F-2. 3. fid

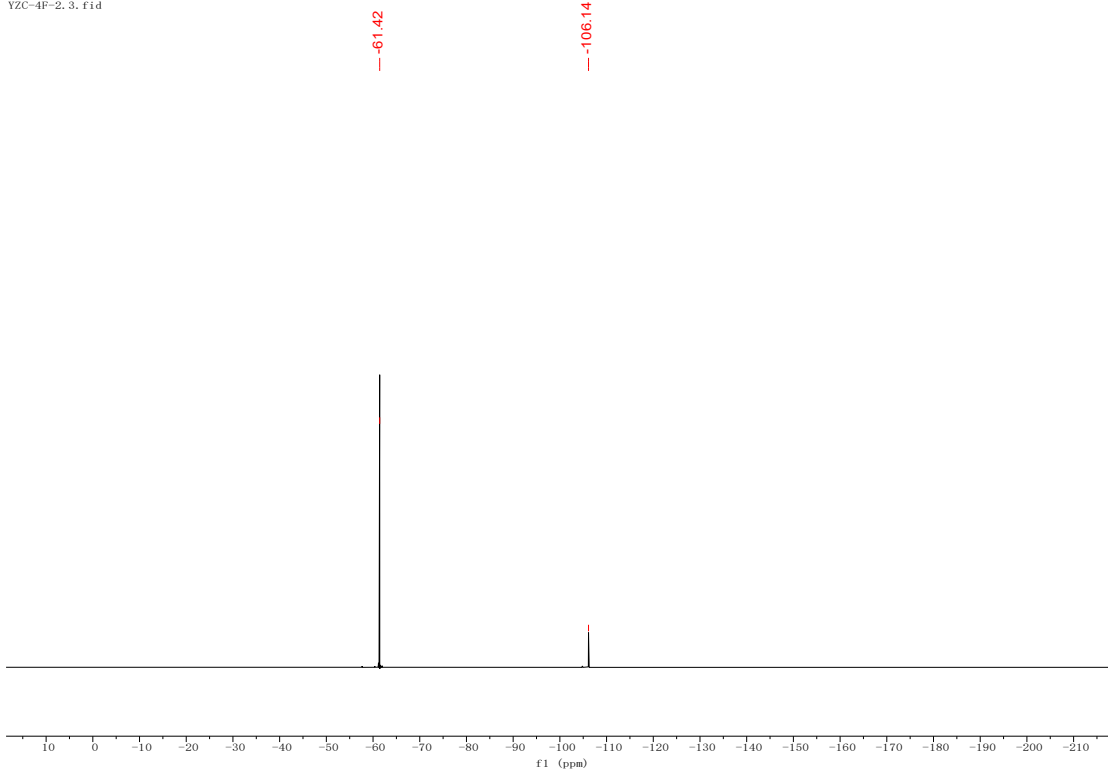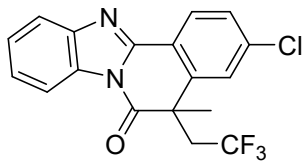

3c

<sup>1</sup>H NMR

YZC-4Cl右. 1. fid

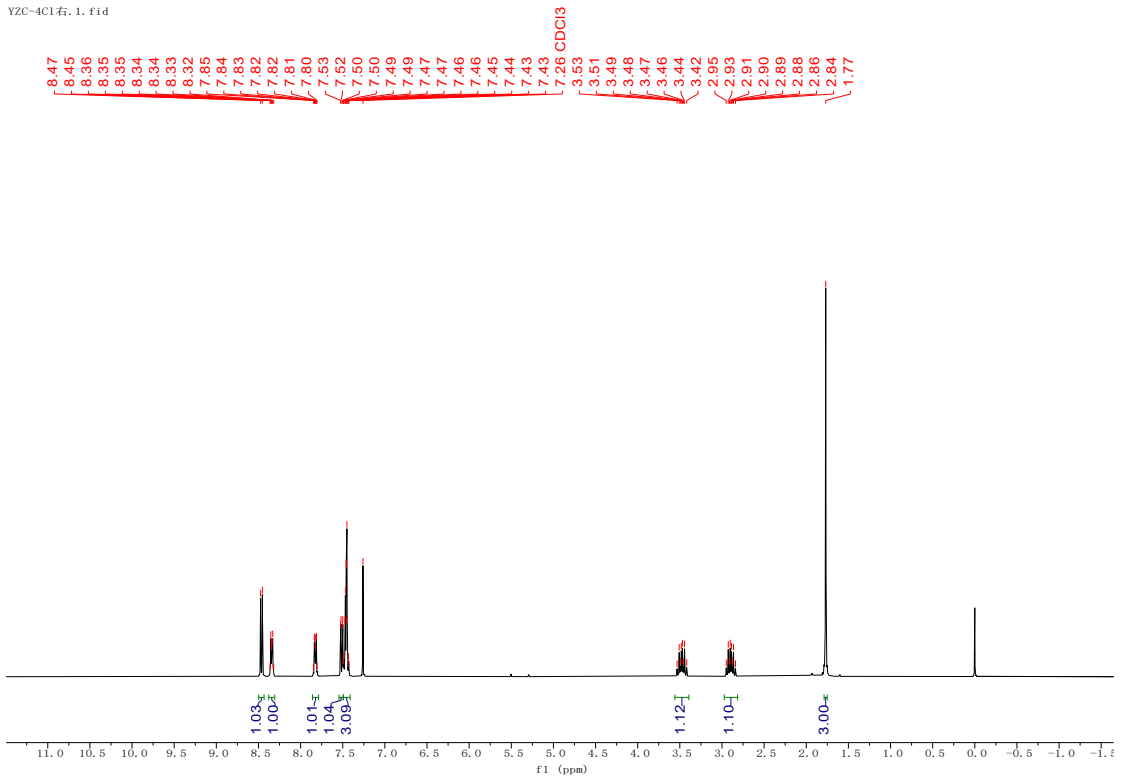

# <sup>13</sup>C NMR

YZC-4Cl右. 2. fid

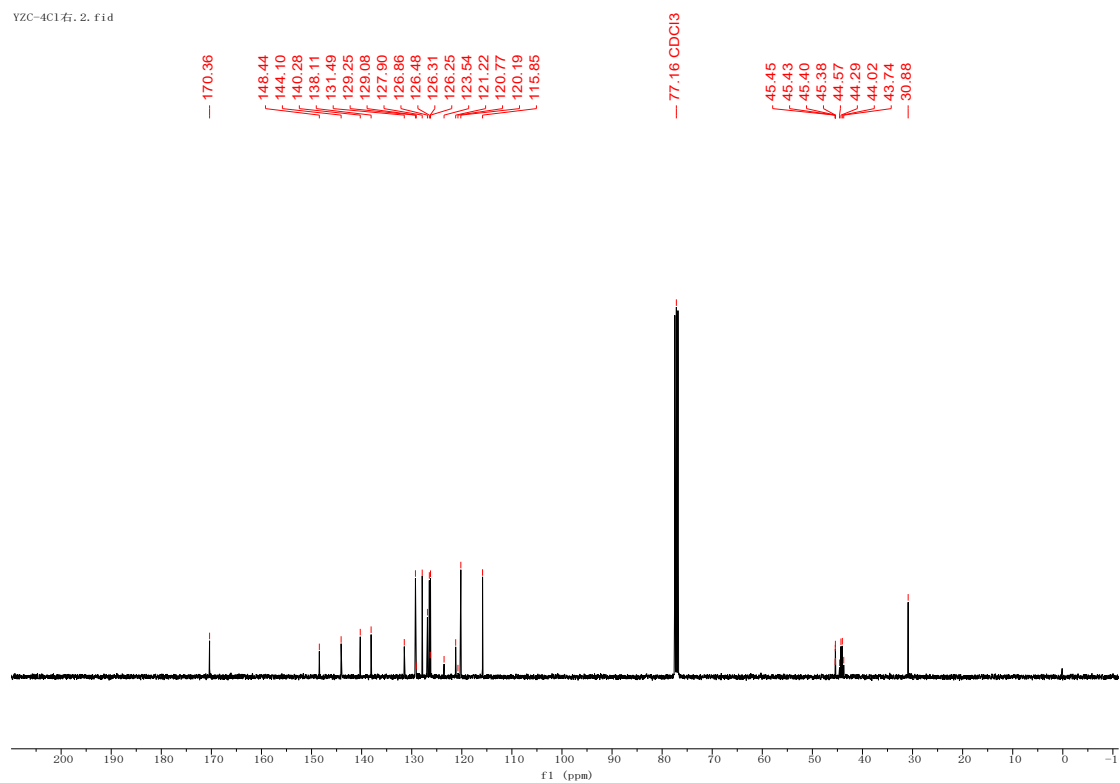

# <sup>19</sup>F NMR

YZC-4Cl右. 3. fid

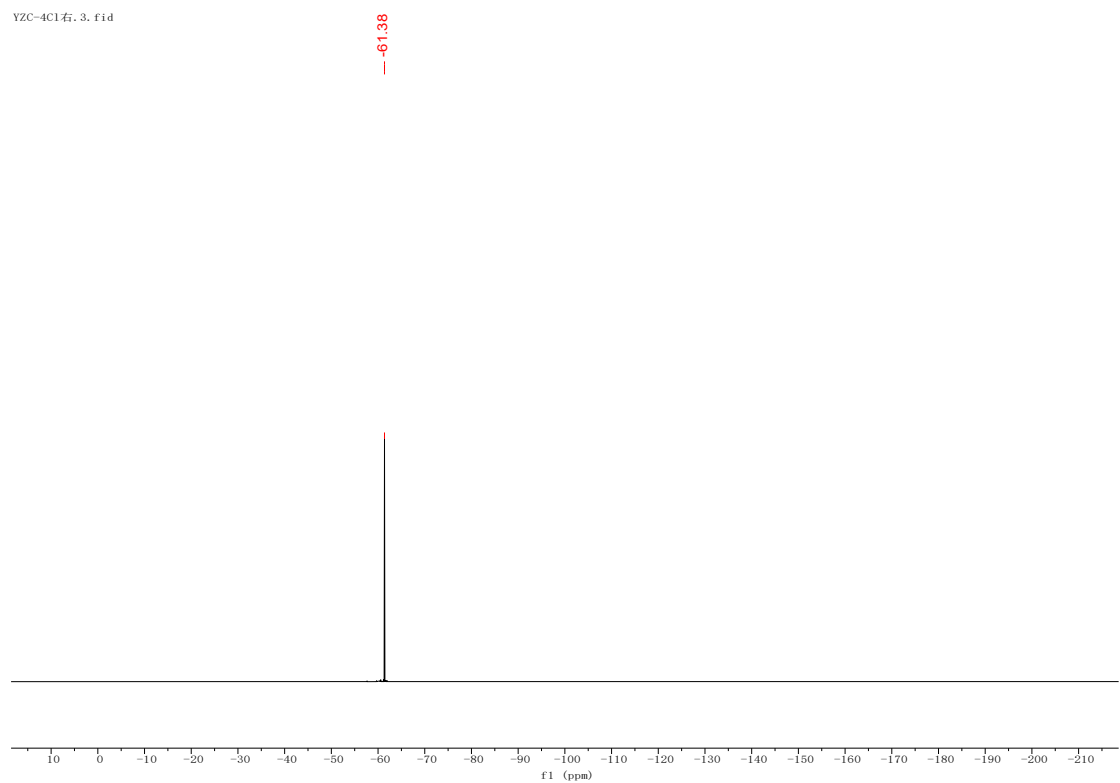

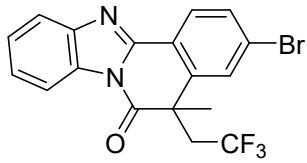

**3d**

**<sup>1</sup>H NMR**

YZC-4Br-2. 1. fid  
iH

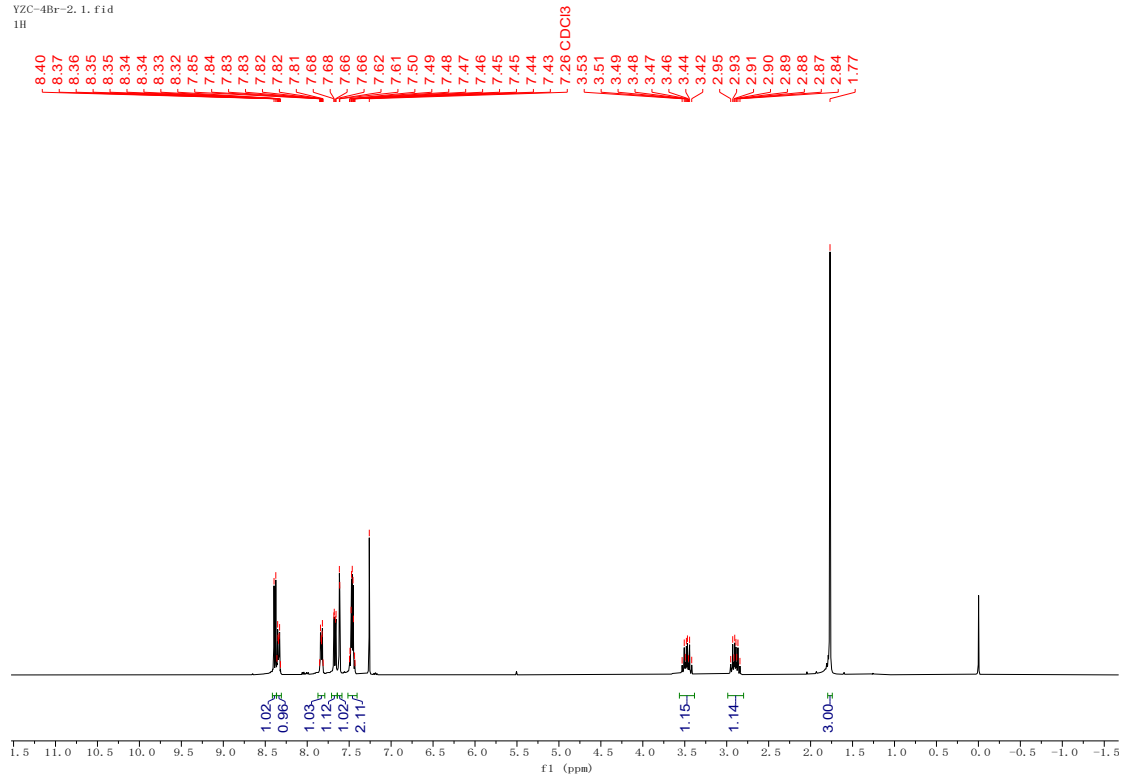

**<sup>13</sup>C NMR**



YZC-4Br-2. 3. fid  
13C

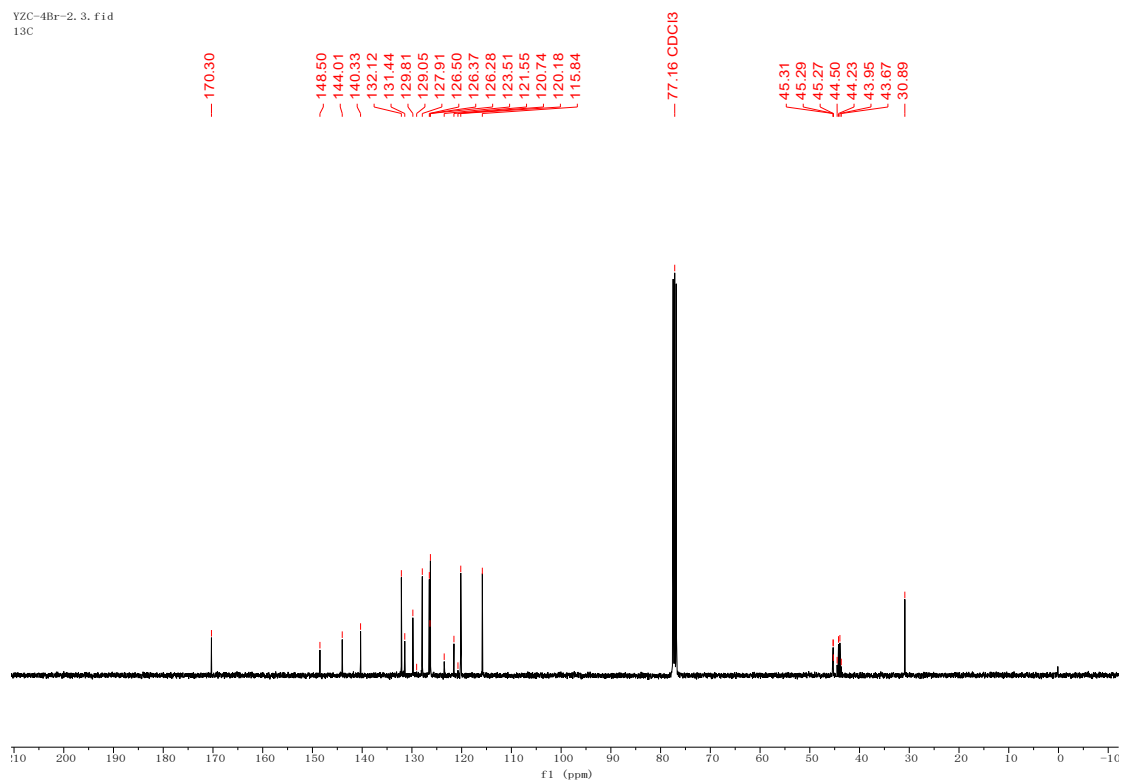

### <sup>19</sup>F NMR

YZC-4Br-2. 2. fid  
19F

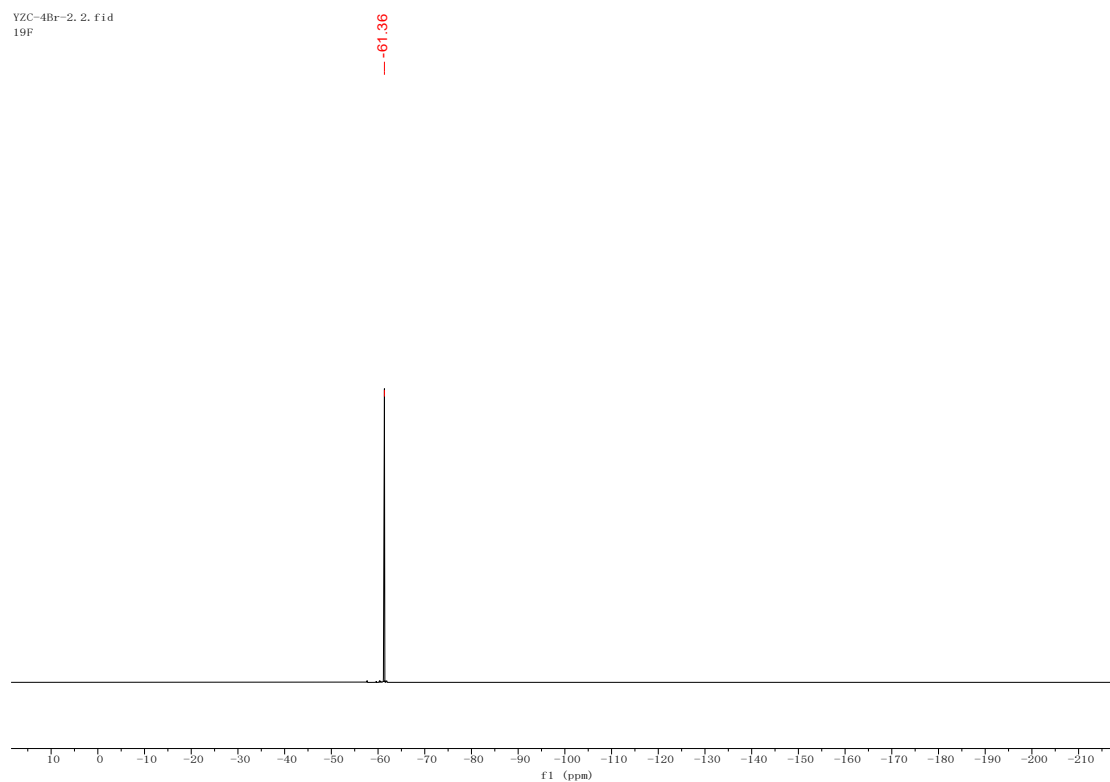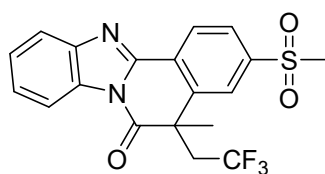

3e

### <sup>1</sup>H NMR

YZC-4S02右. 1. fid  
1H

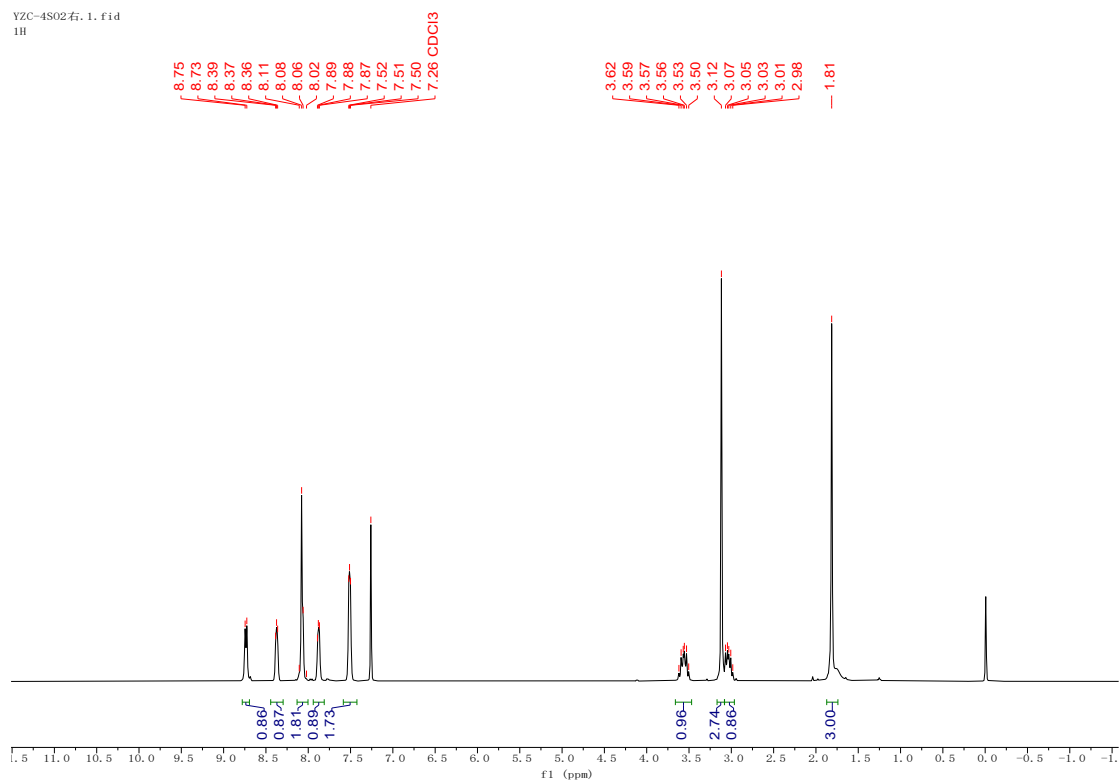

### <sup>13</sup>C NMR

YZC-4S02右. 2. fid  
13C

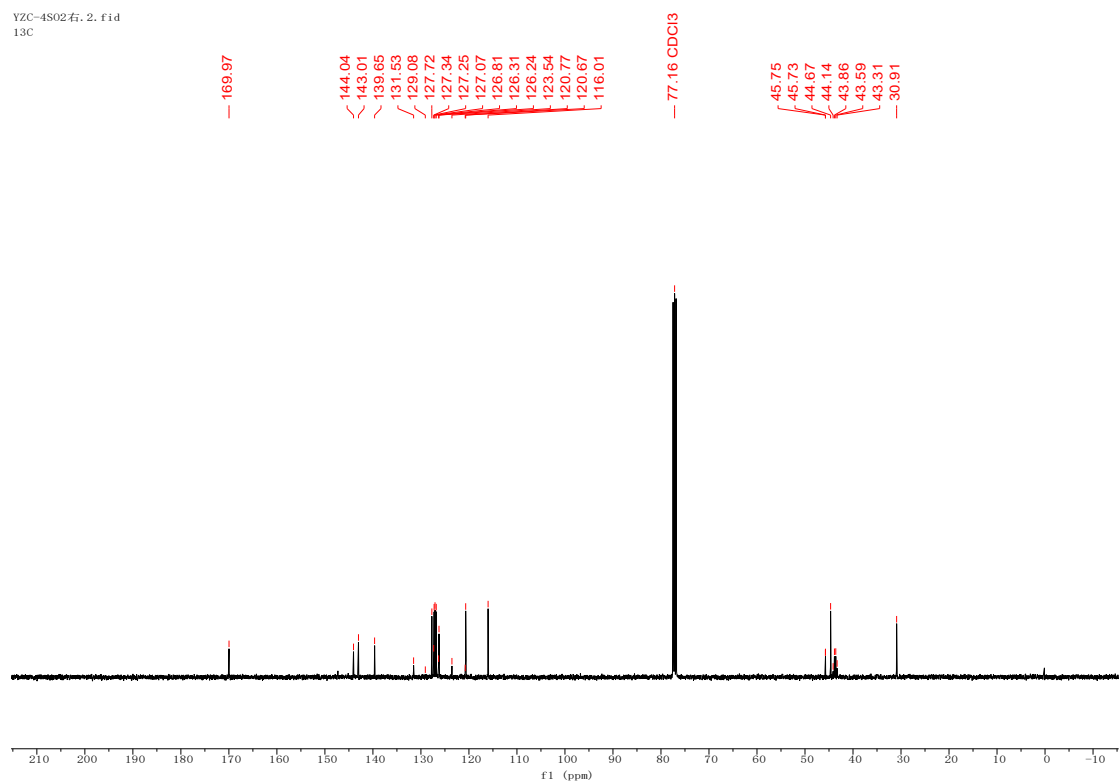

### <sup>19</sup>F NMR

YZC-4S02右. 3. fid  
19F

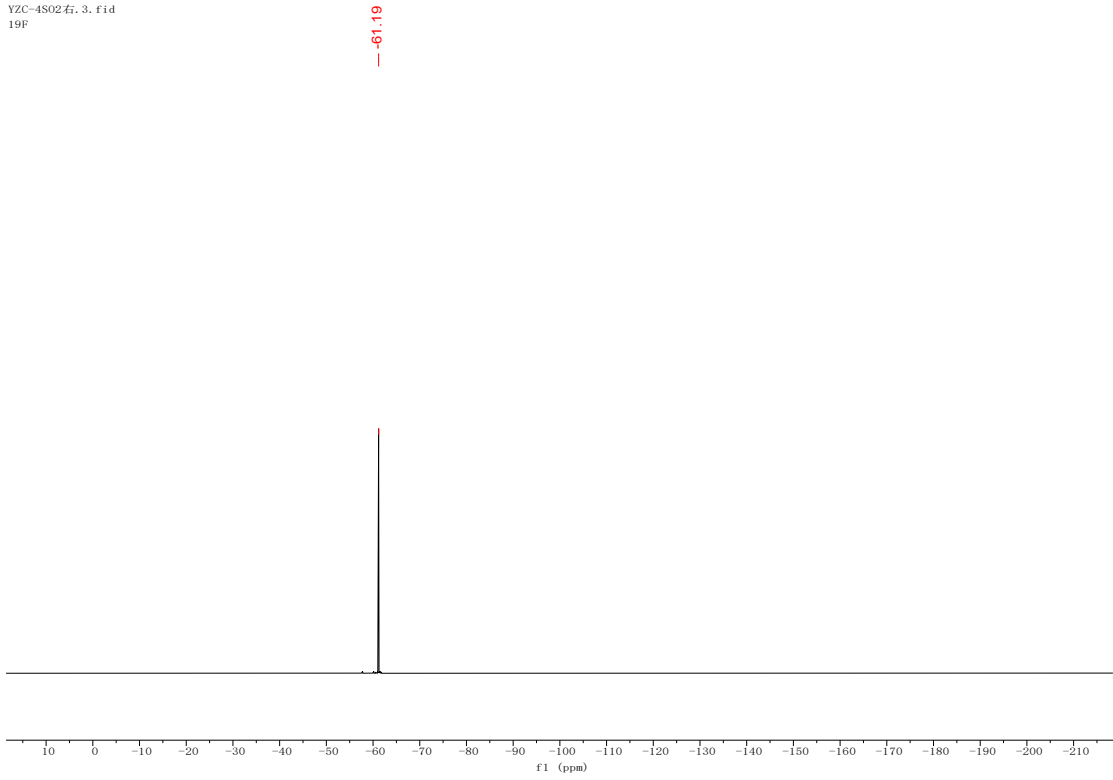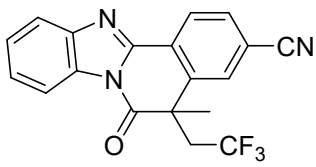

3f

<sup>1</sup>H NMR

YZC-4CN右. 1. fid

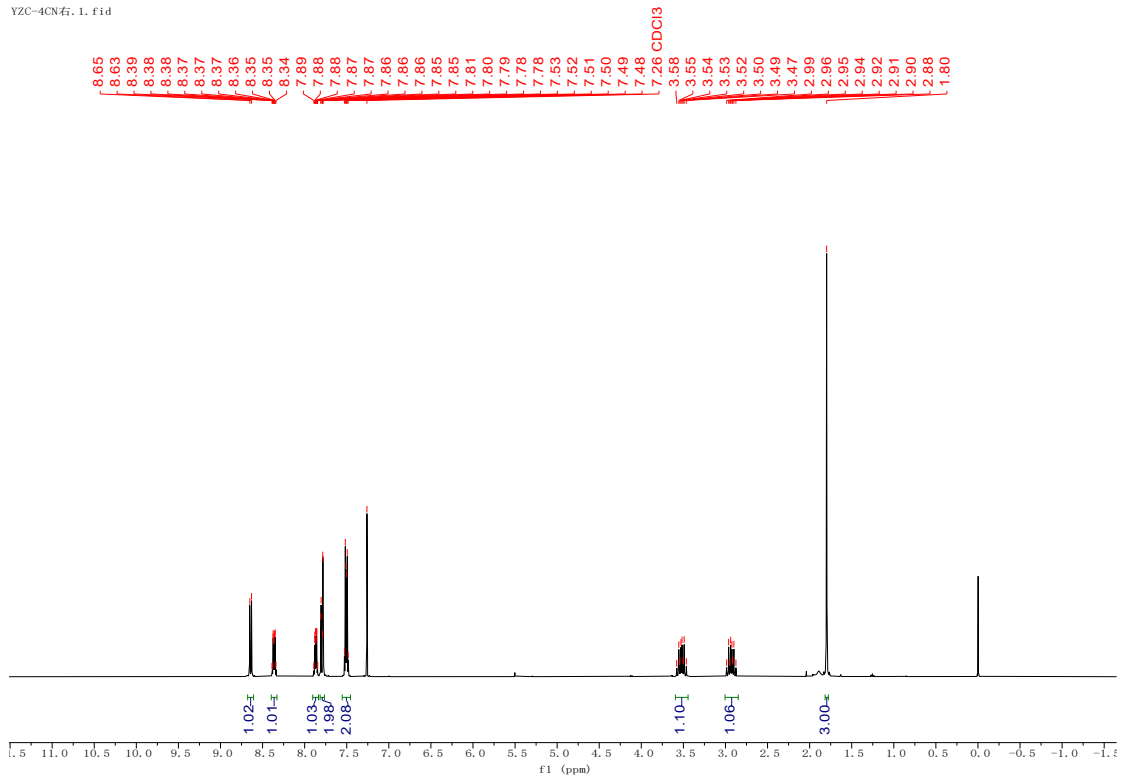

# <sup>13</sup>C NMR

YZC-4CN右. 2. fid

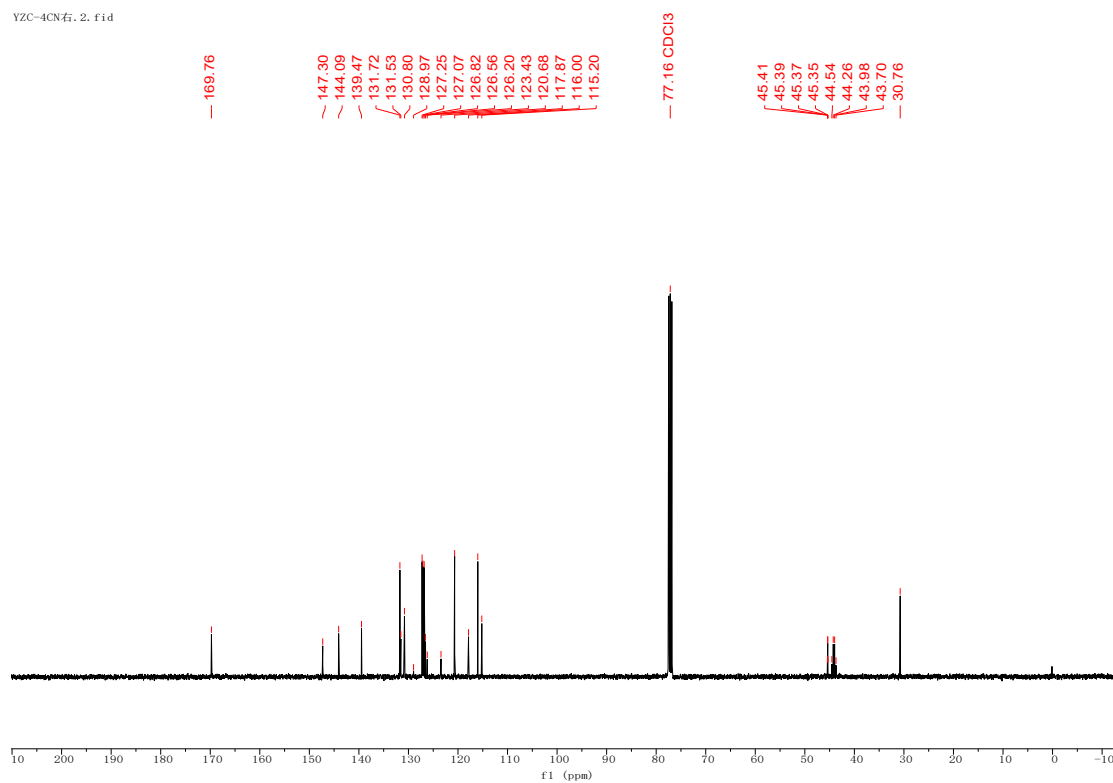

# <sup>19</sup>F NMR

YZC-4CN右. 3. fid

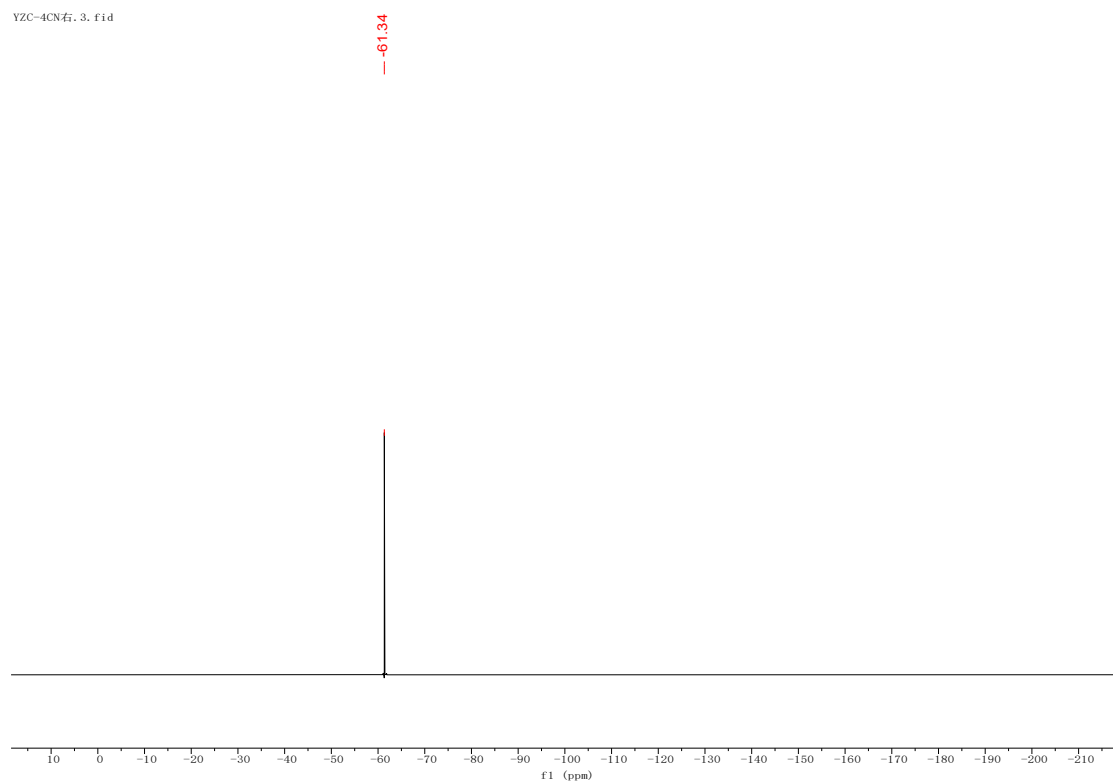

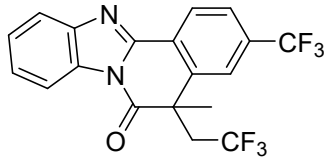

**3g**

**<sup>1</sup>H NMR**

YZC-4CF3右. 1. fid

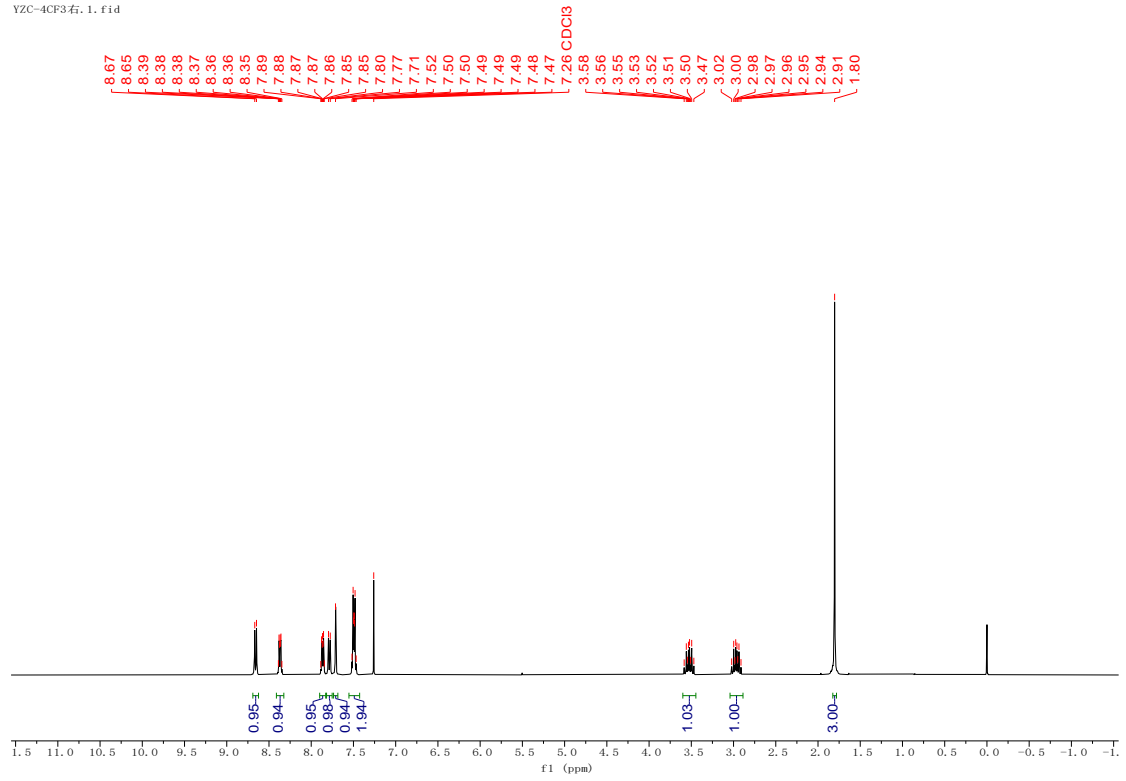

**<sup>13</sup>C NMR**

YZC-4CF3右. 2. fid

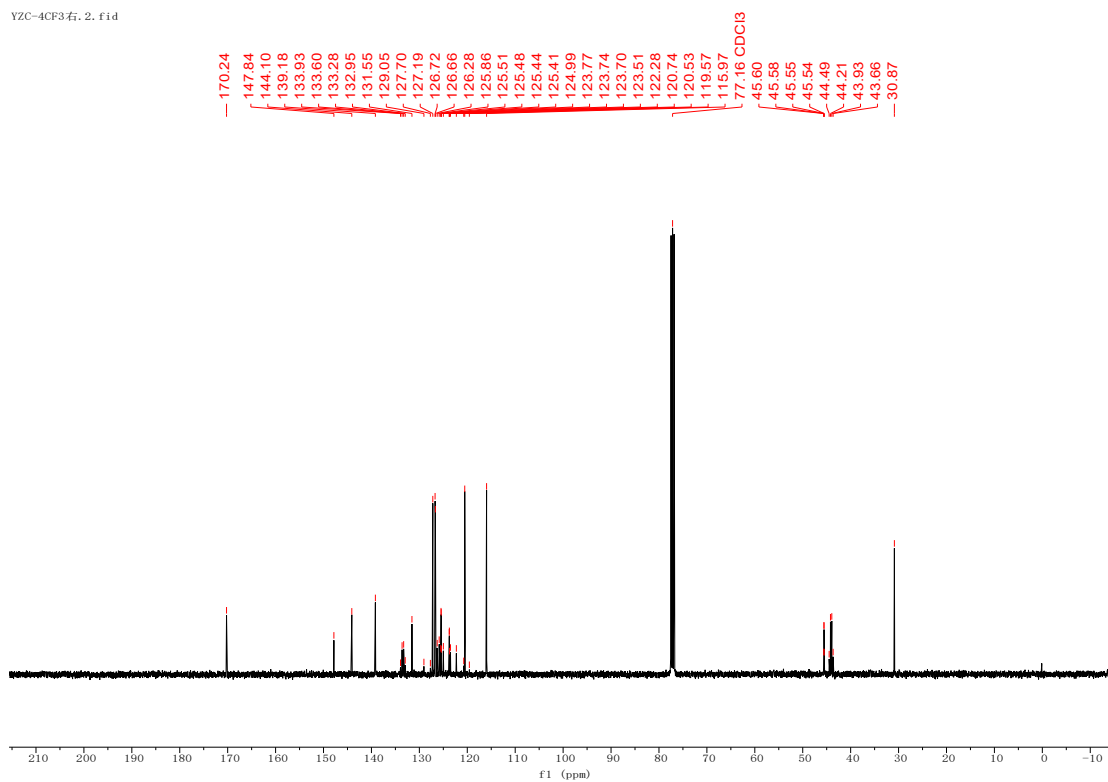

### <sup>19</sup>F NMR

YZC-4CF3右. 3. fid

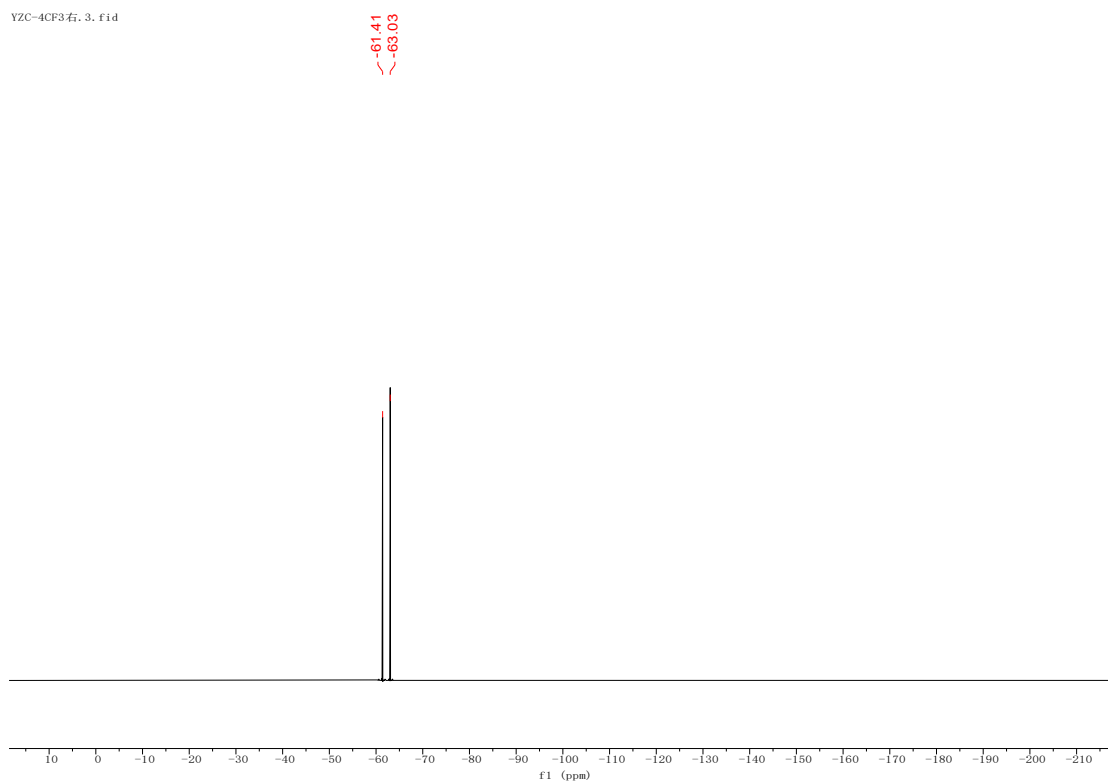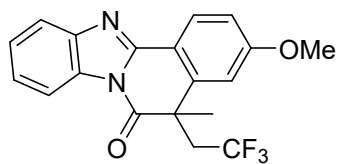

3h

# <sup>1</sup>H NMR

YZC-40Me右: 1. fid

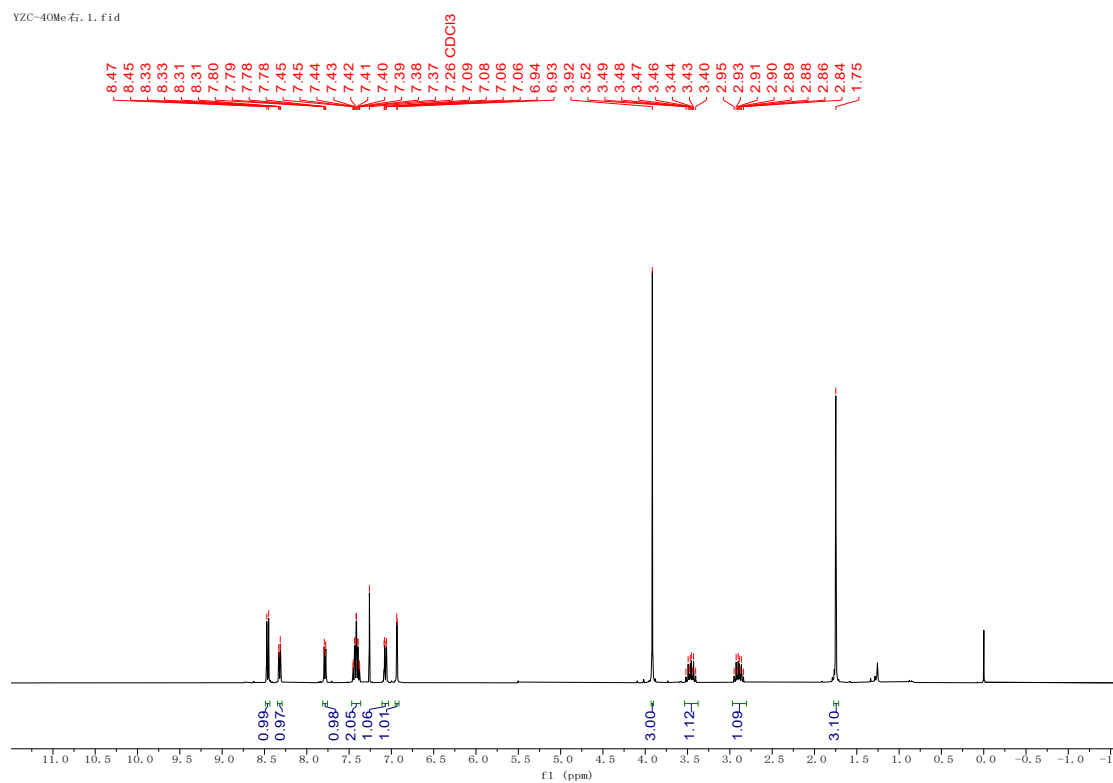

# <sup>13</sup>C NMR

YZC-40Me右: 2. fid

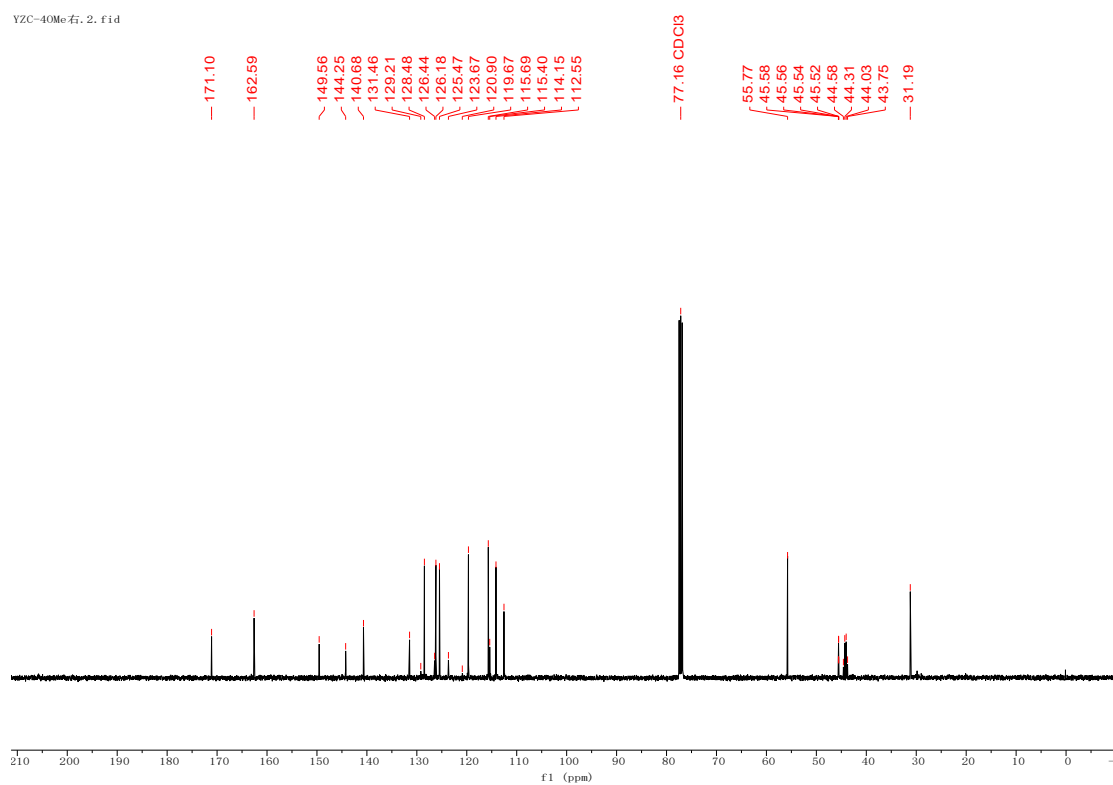

# <sup>19</sup>F NMR

YZC-40Me右. 3. fid

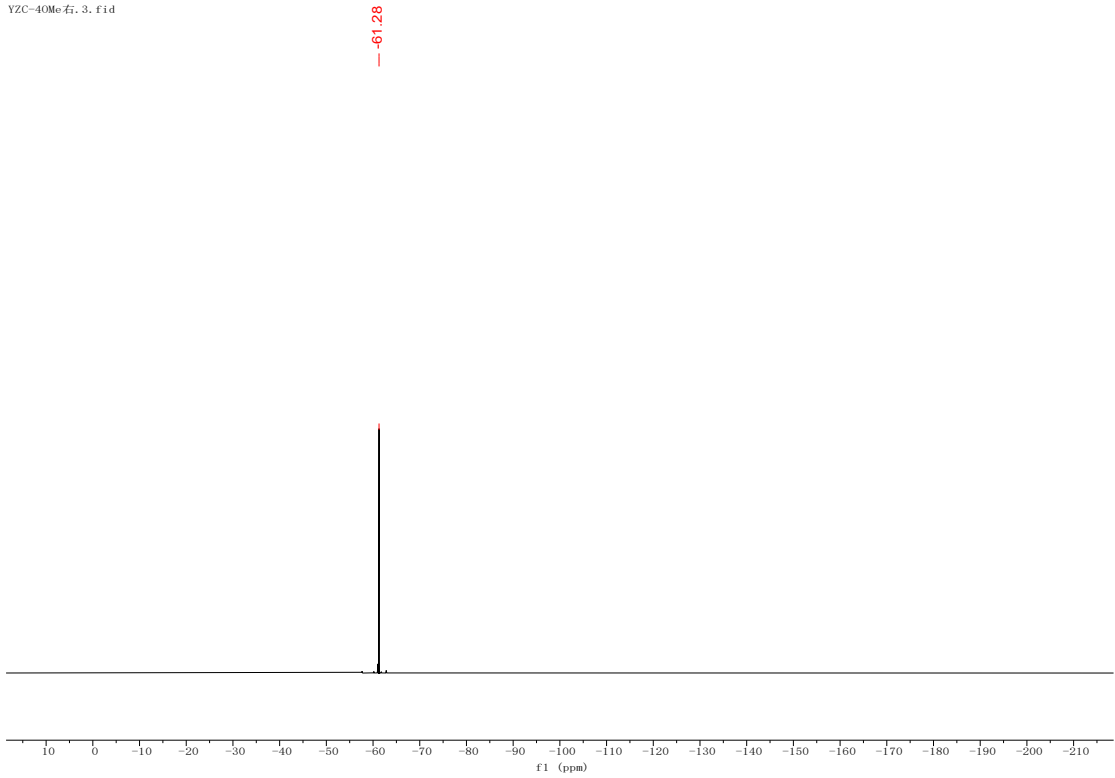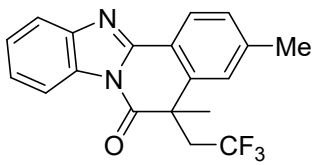

3i

<sup>1</sup>H NMR

YZC-4Me右. 1. fid  
1H

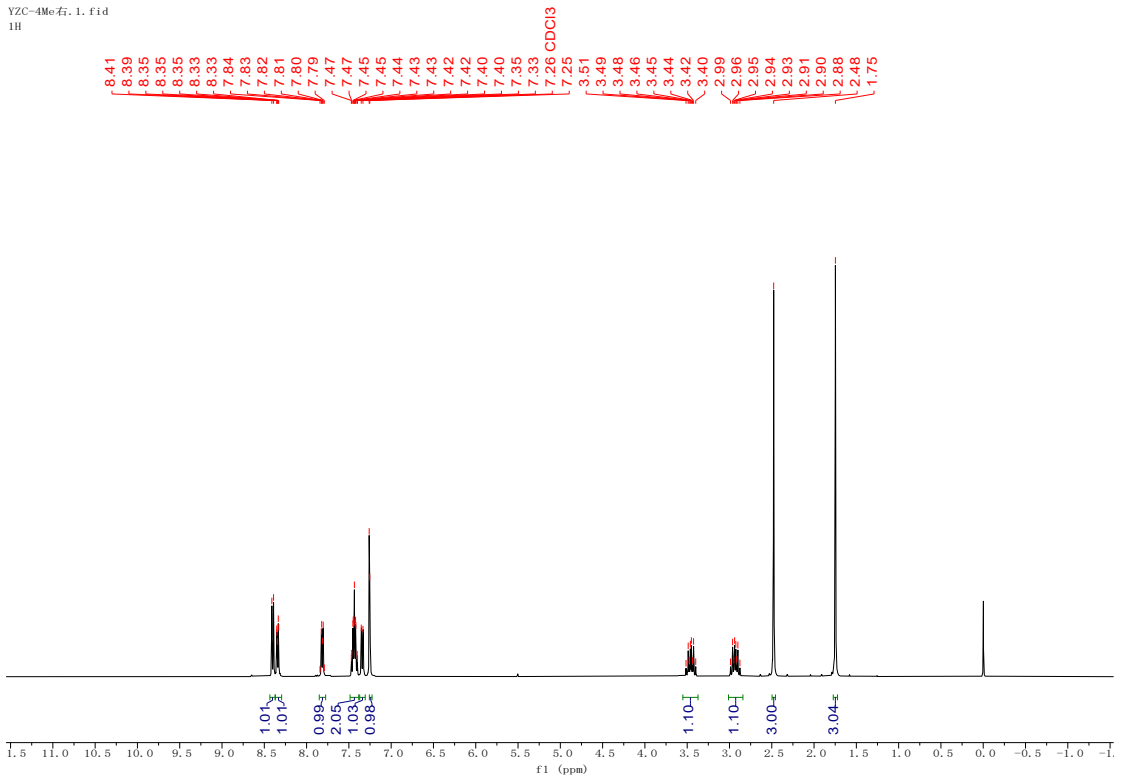



# <sup>13</sup>C NMR

YZC-4Me右. 2. fid  
13C

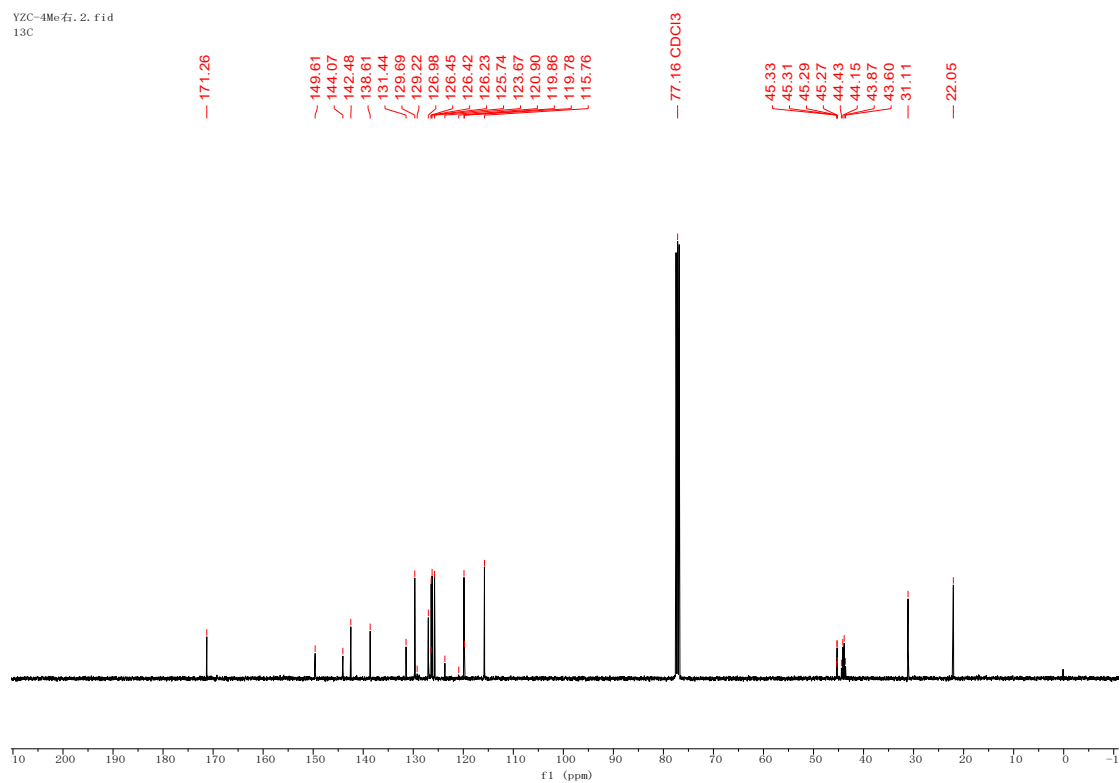

# <sup>19</sup>F NMR

YZC-4Me右. 3. fid  
19F

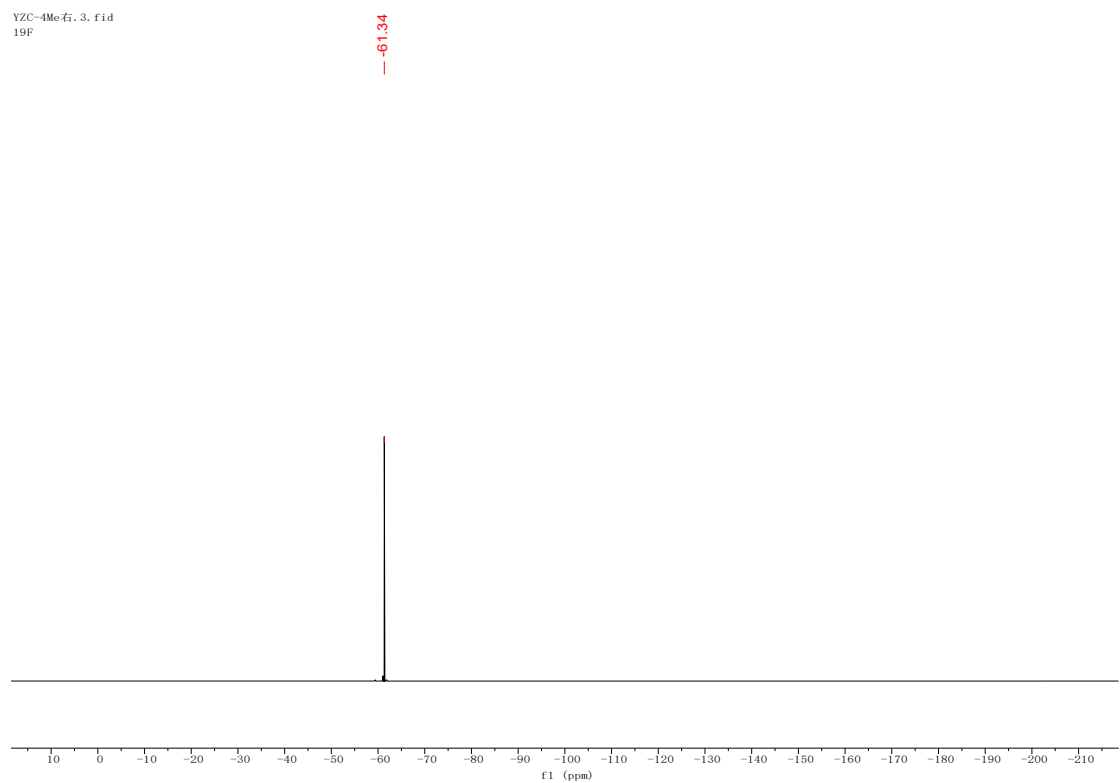

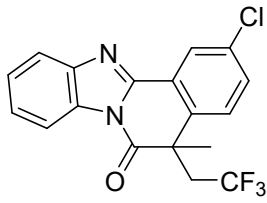

**3j**

**<sup>1</sup>H NMR**

YZC-3Cl右, 1. fid  
1H

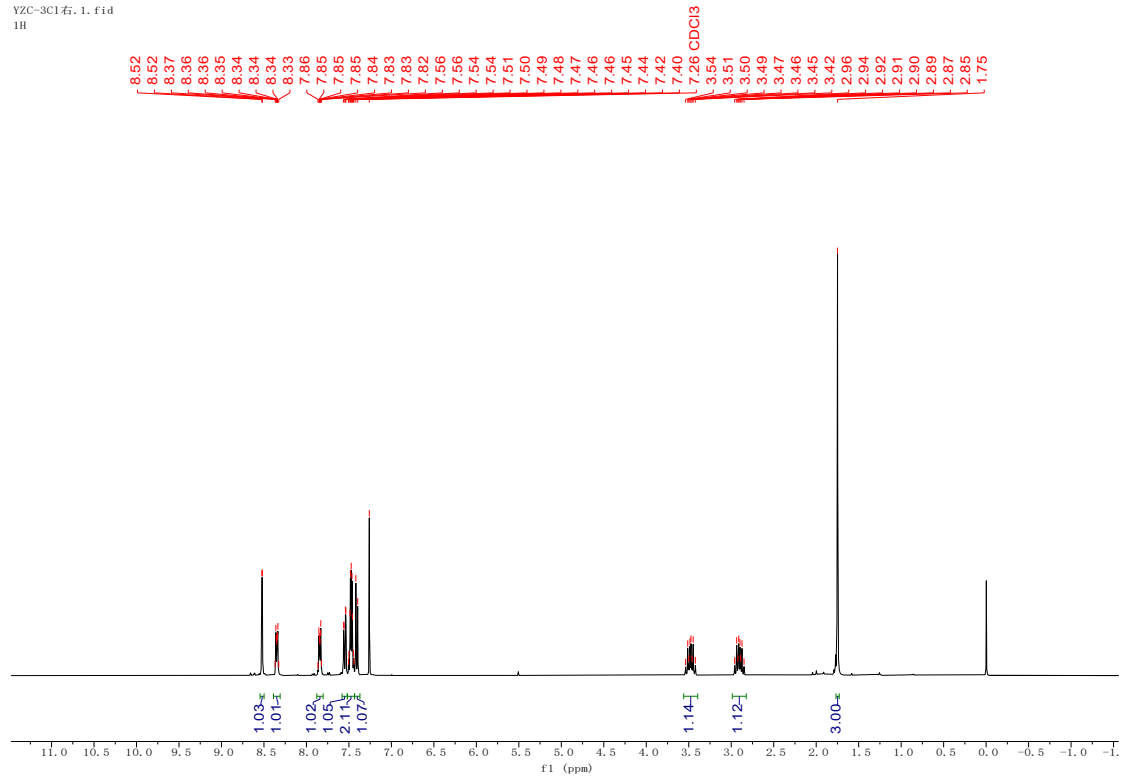

**<sup>13</sup>C NMR**

YZC-3Cl右. 2. fid  
13C

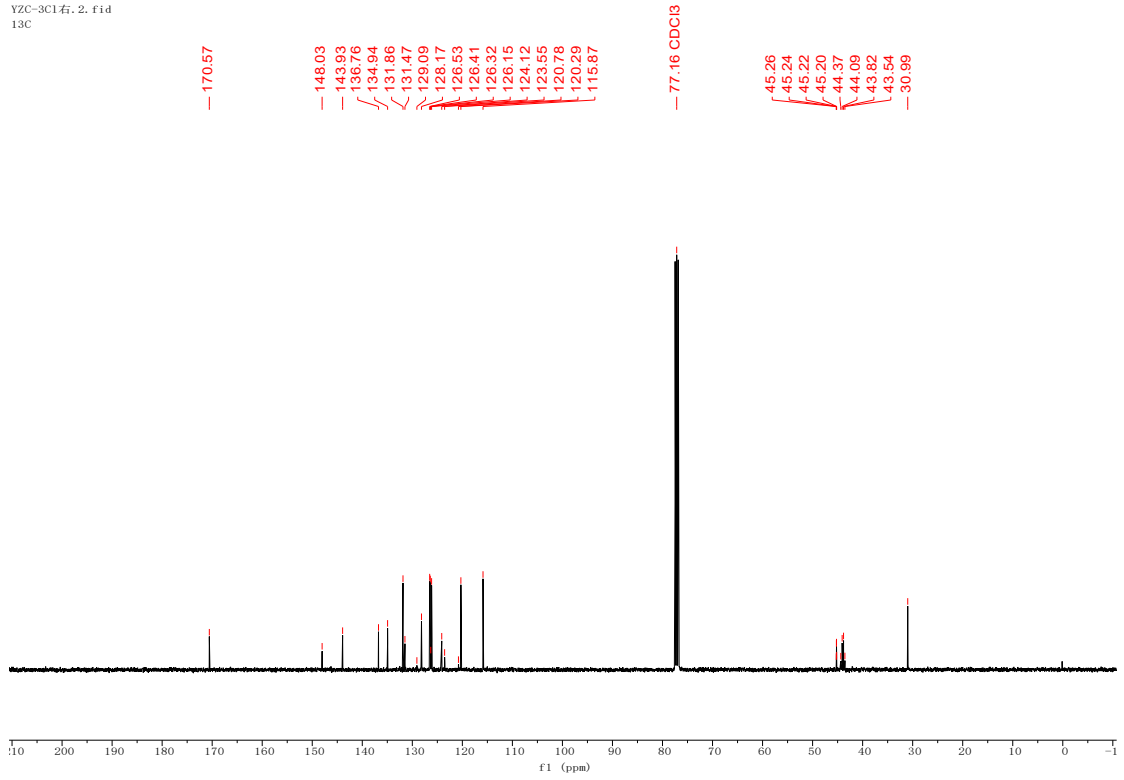

### **<sup>19</sup>F NMR**

YZC-3Cl右. 3. fid  
19F

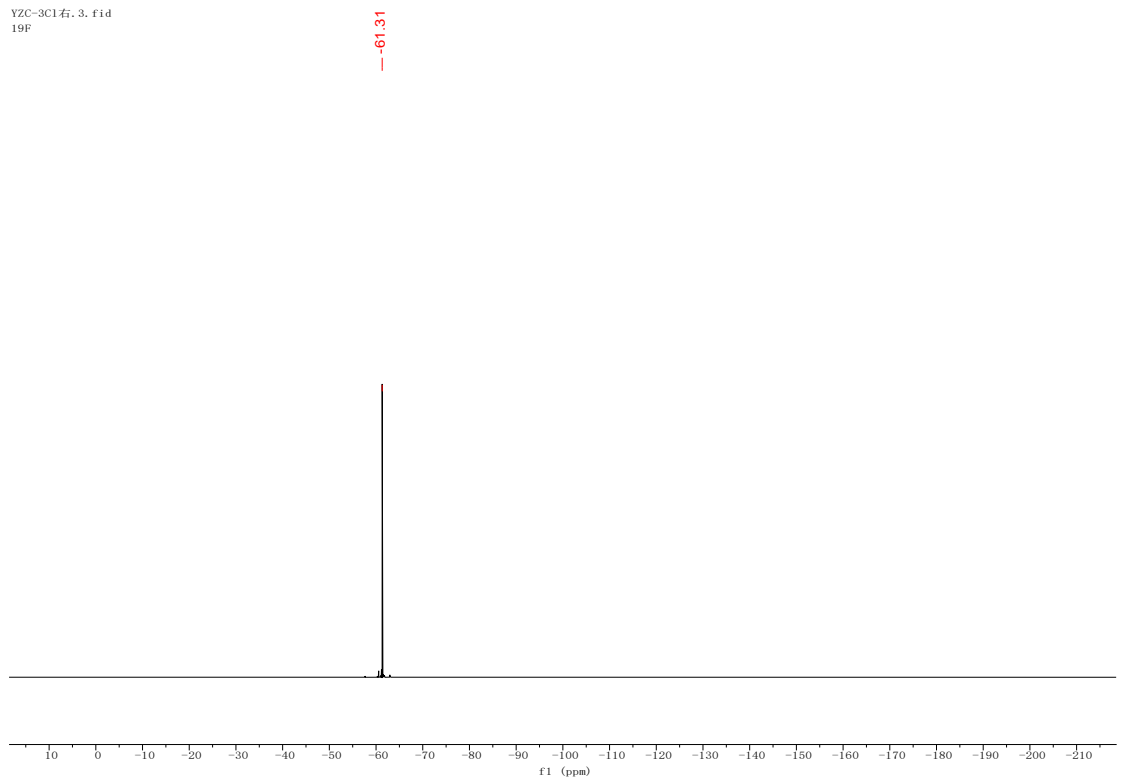

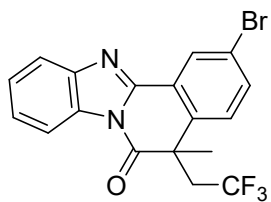

**3k**

**<sup>1</sup>H NMR**

YZC-3Br右, 1. fid  
1H

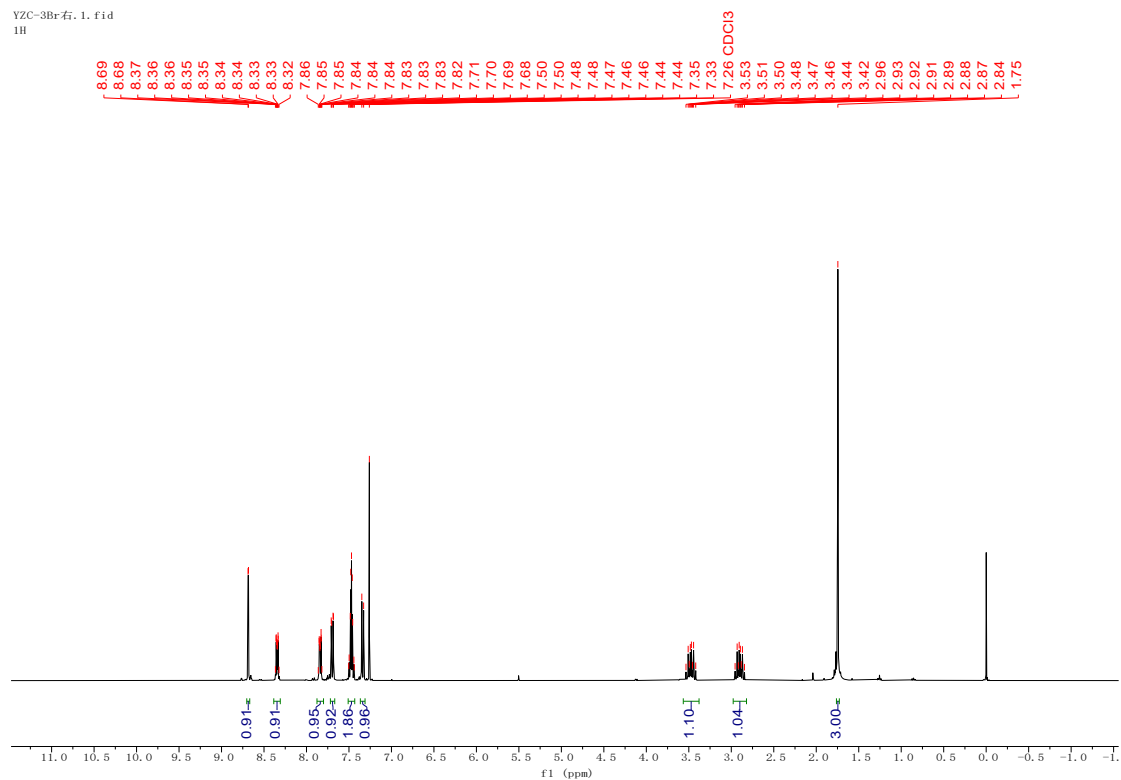

**<sup>13</sup>C NMR**

YZC-3Br右. 2. fid  
13C

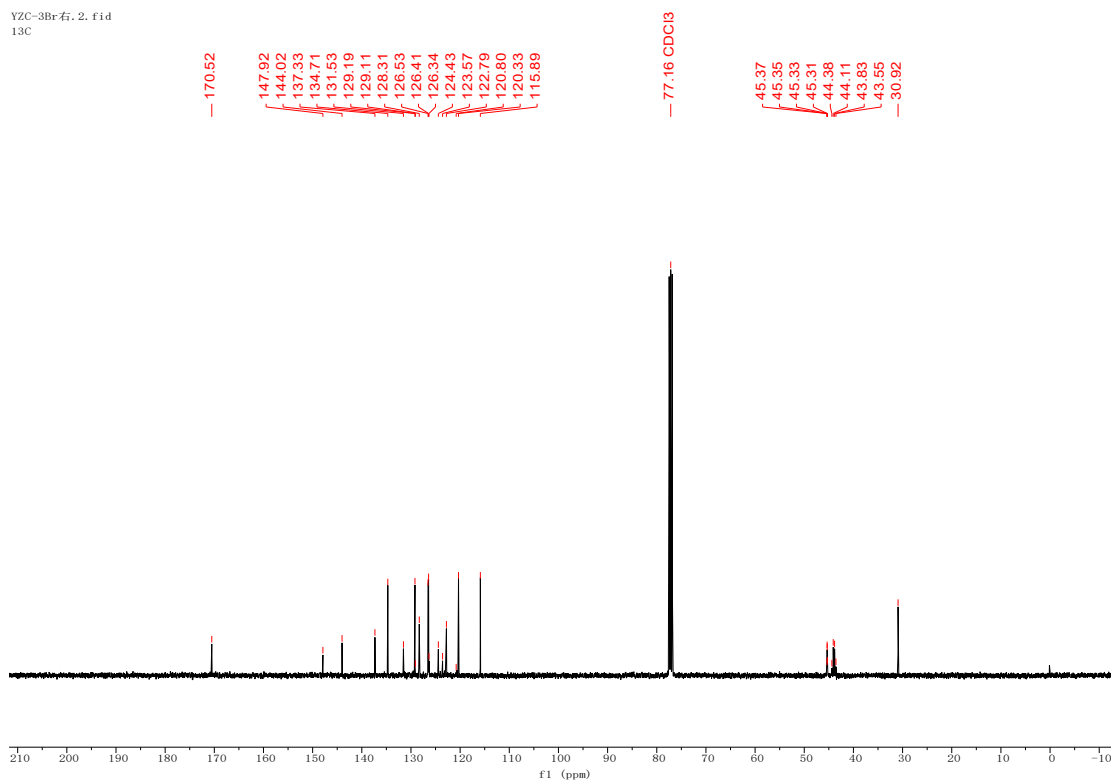

### **<sup>19</sup>F NMR**

YZC-3Br右. 3. fid  
19F

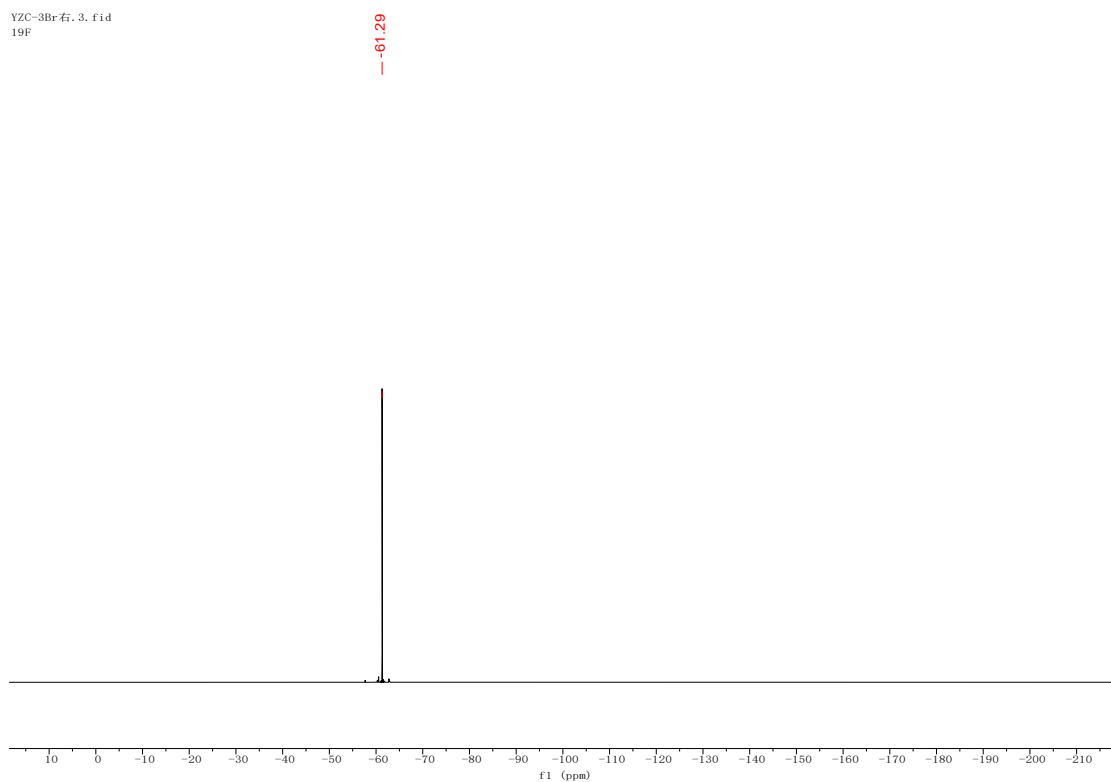

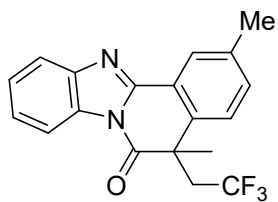

3I

**<sup>1</sup>H NMR**

YZC-3ME-2, 1, fid  
1H

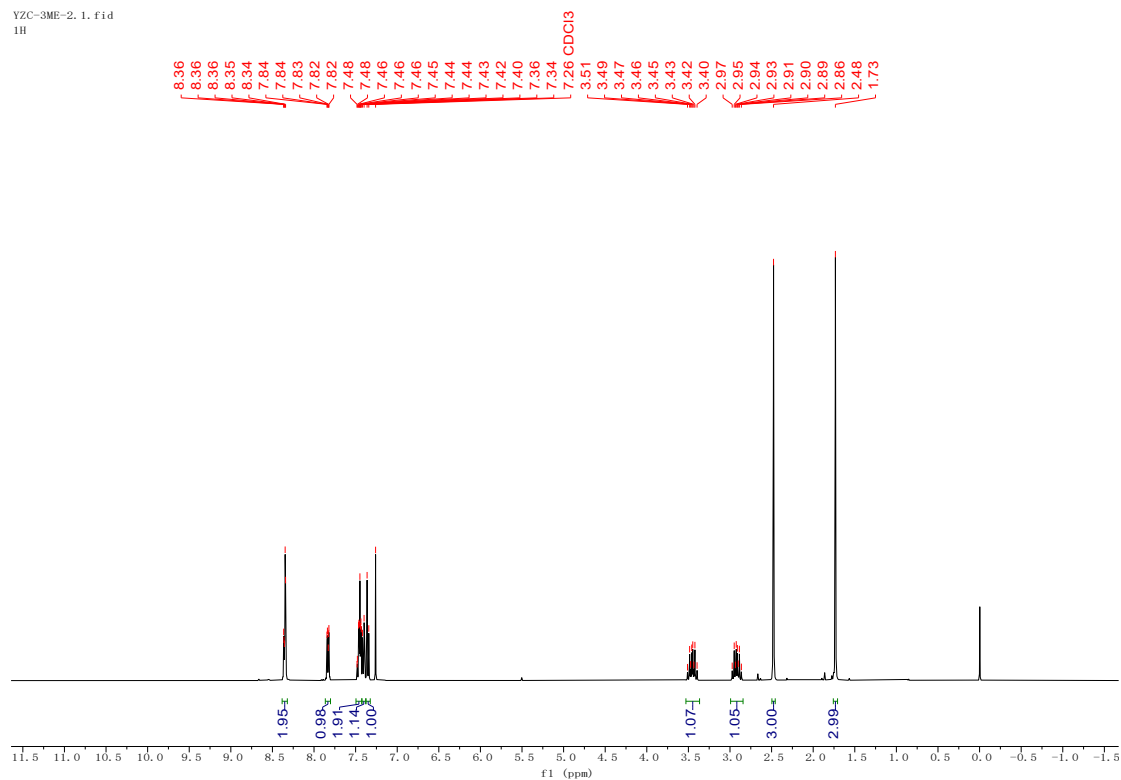

**<sup>13</sup>C NMR**

YZC-3ME-2. 2. fid  
13C

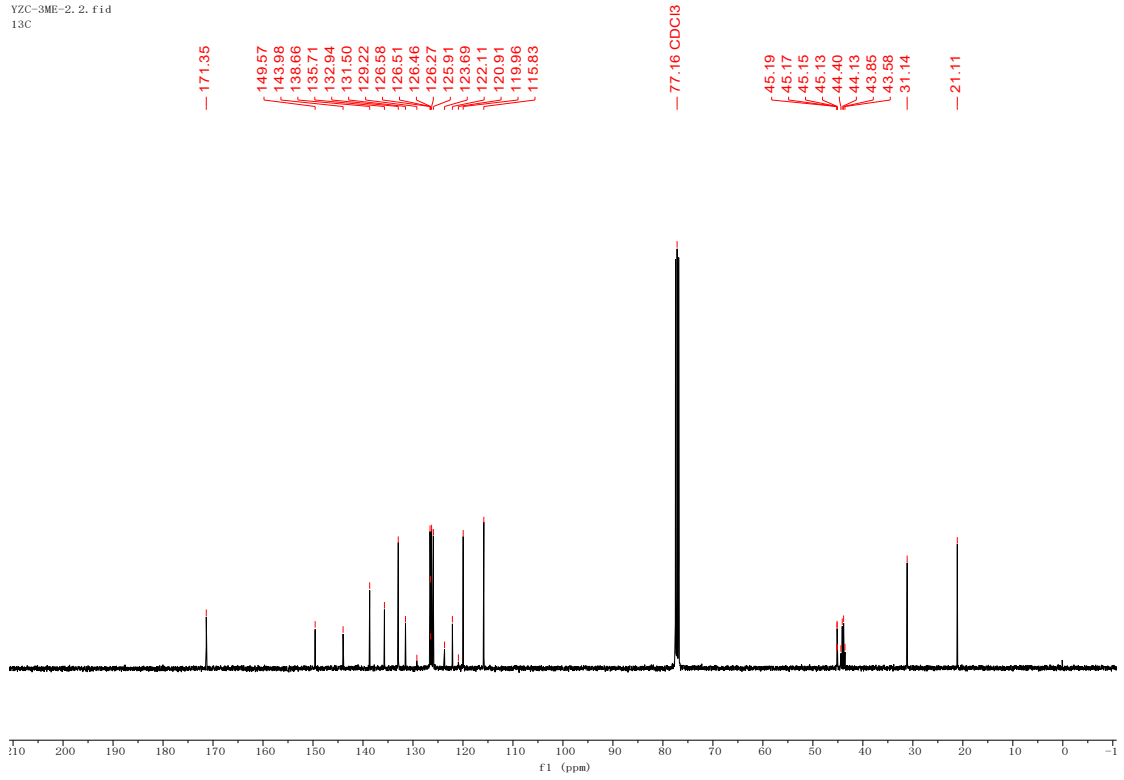

### **<sup>19</sup>F NMR**

YZC-3ME-2. 3. fid  
19F

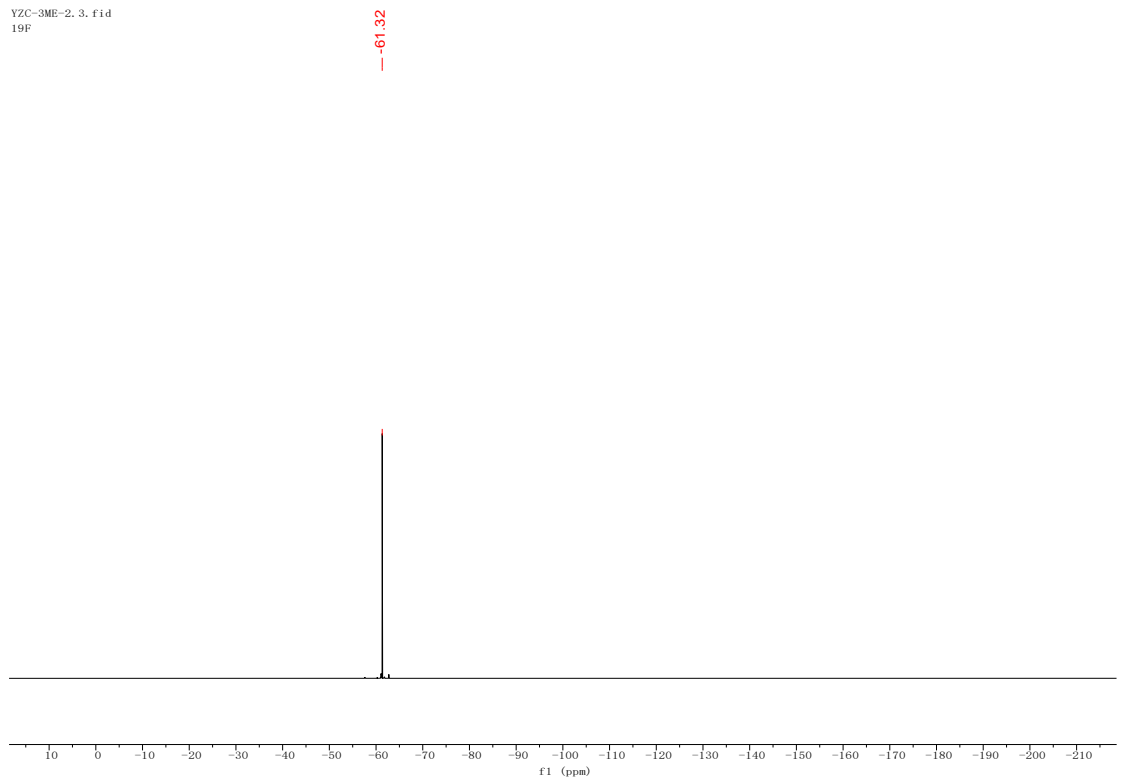

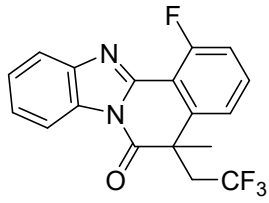

**3m**

**<sup>1</sup>H NMR**

YZC-2F右.1. fid  
1H

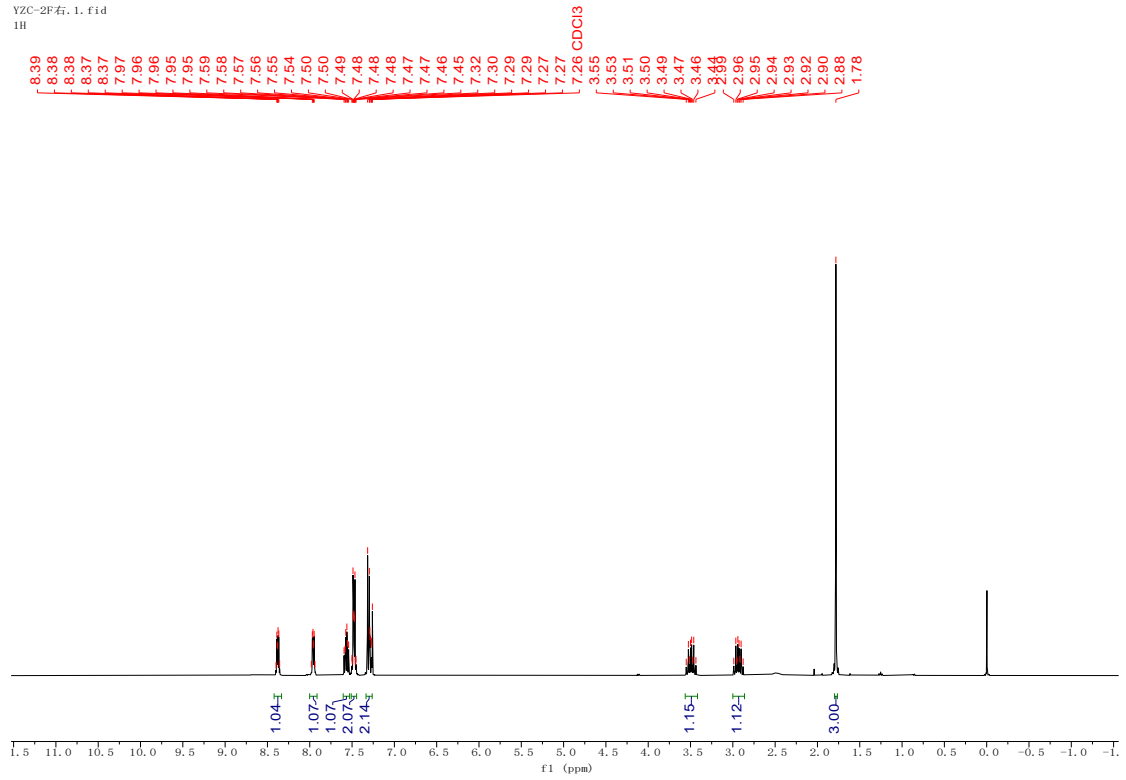

**<sup>13</sup>C NMR**



YZC-2F右. 2. fid  
13C

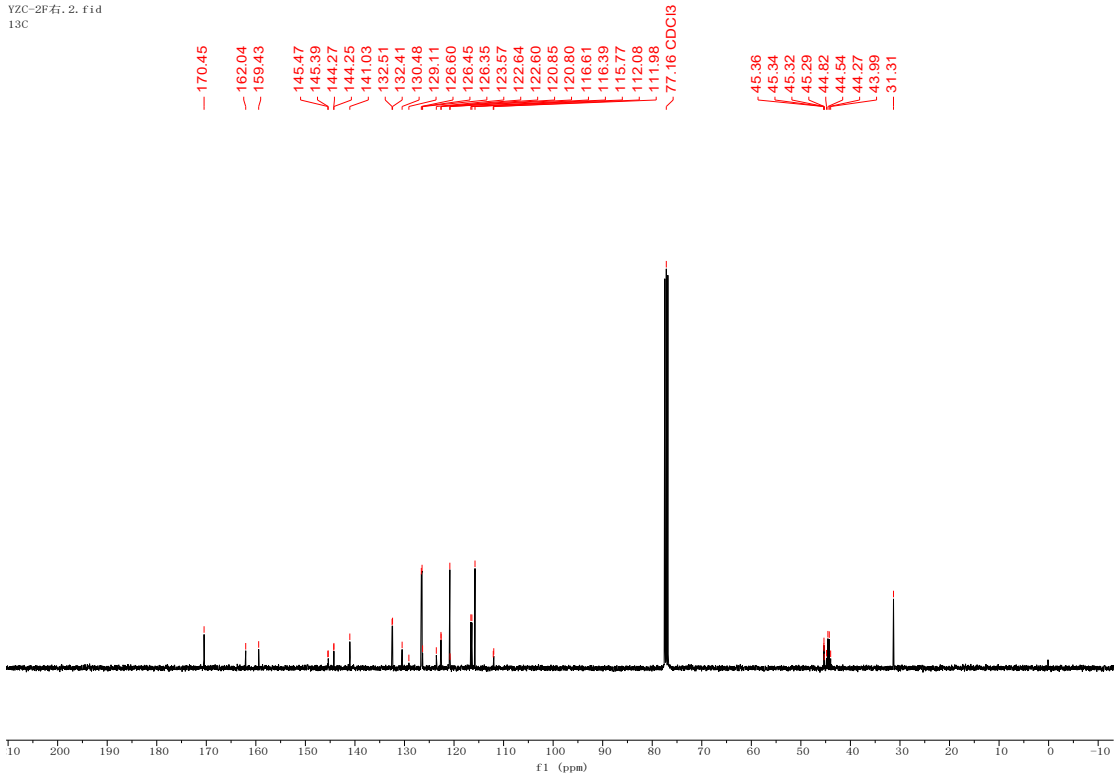

### <sup>19</sup>F NMR

YZC-2F右. 3. fid  
19F

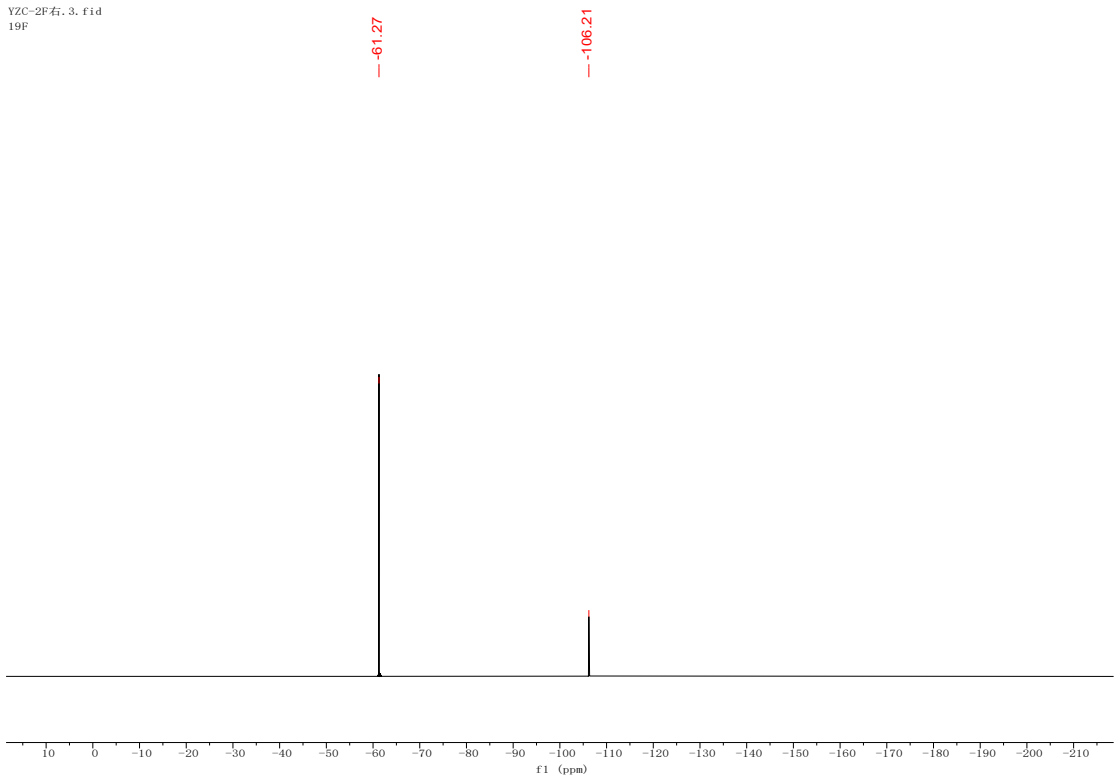

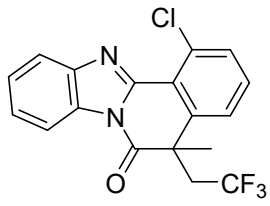

**3n**

**<sup>1</sup>H NMR**

YZC-2CL-2, 1. fid  
1H

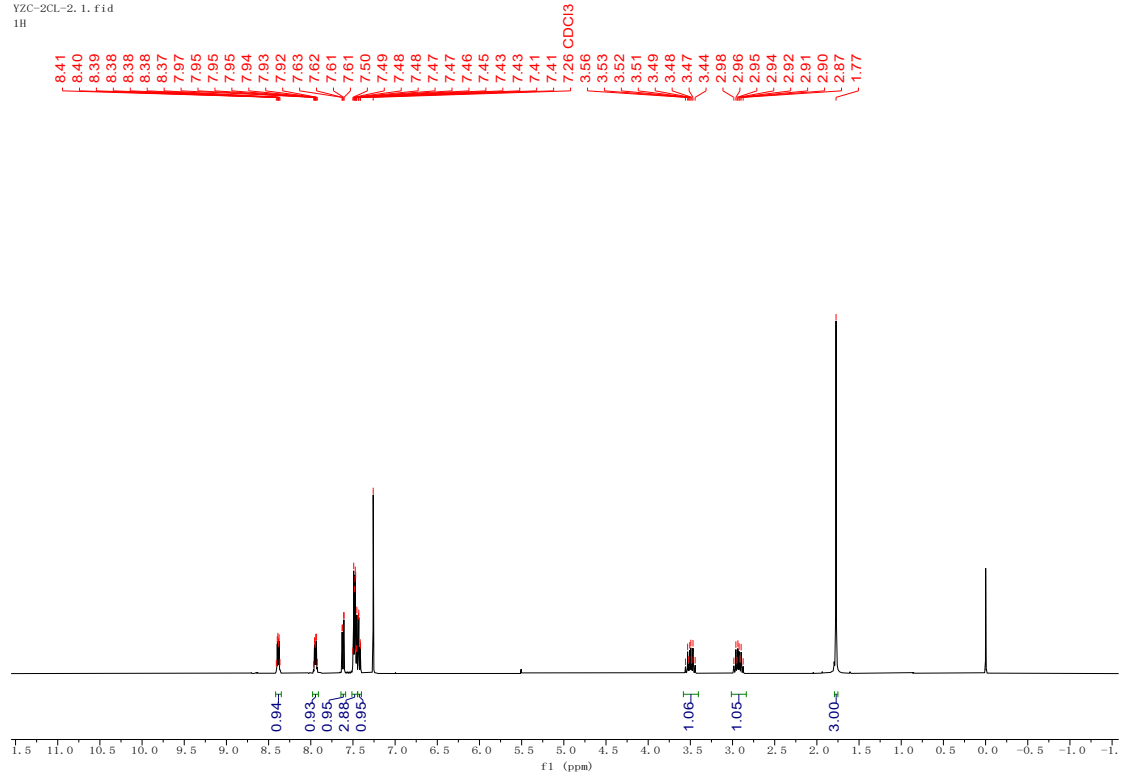

**<sup>13</sup>C NMR**

YZC-2CL-2. 2. fid  
13C

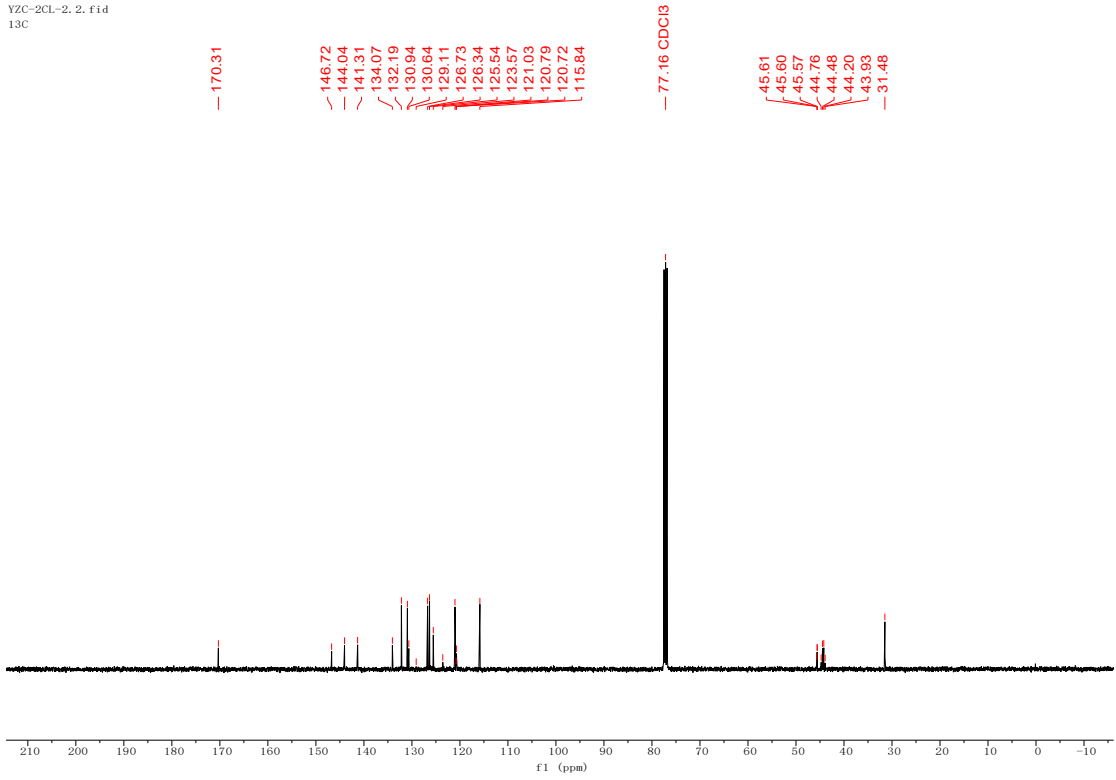

### **19F NMR**

YZC-2CL-2. 3. fid  
19F

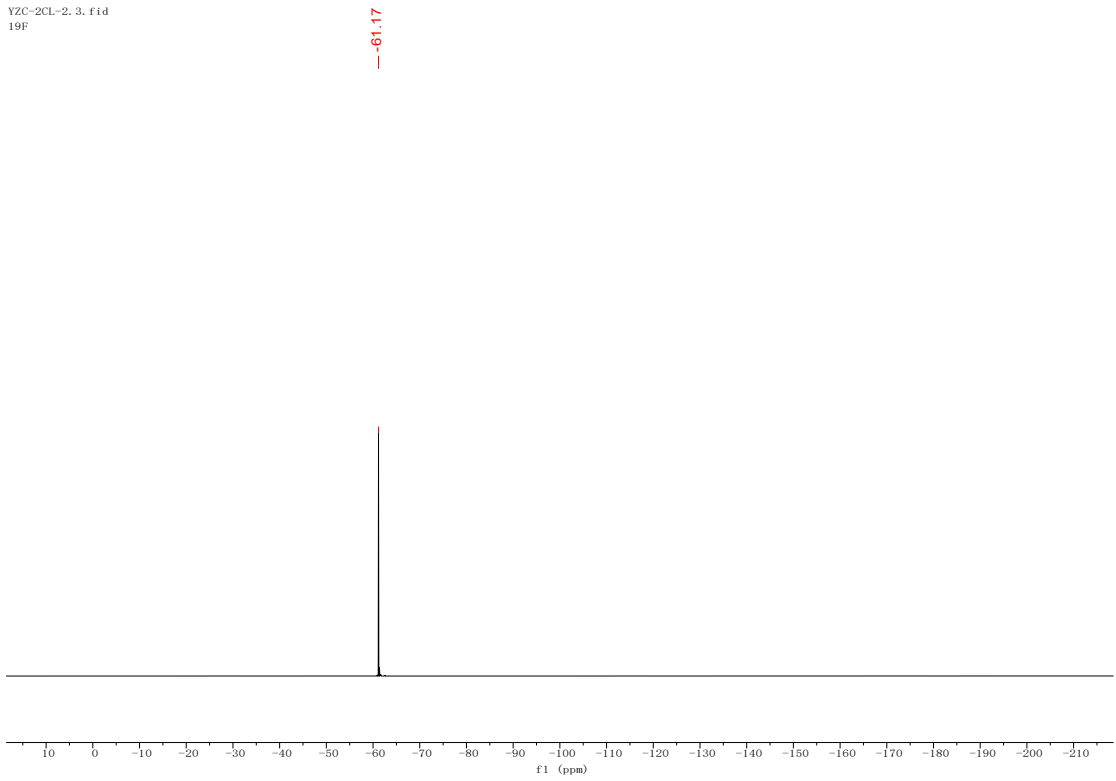

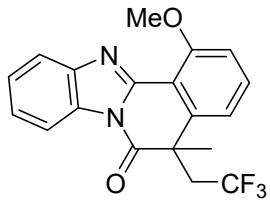

**3o**

**<sup>1</sup>H NMR**

YZC-20Me右. 1. fid  
1H

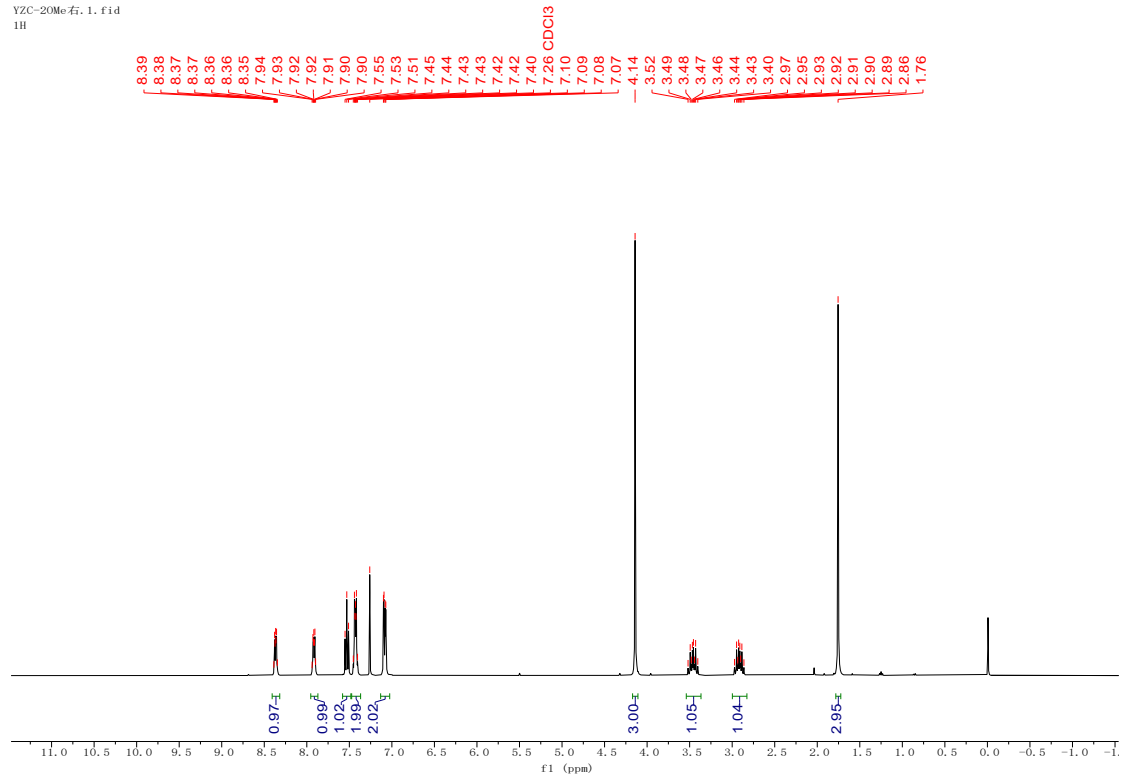

**<sup>13</sup>C NMR**

YZC-20Me.zi. 2. fid  
13C

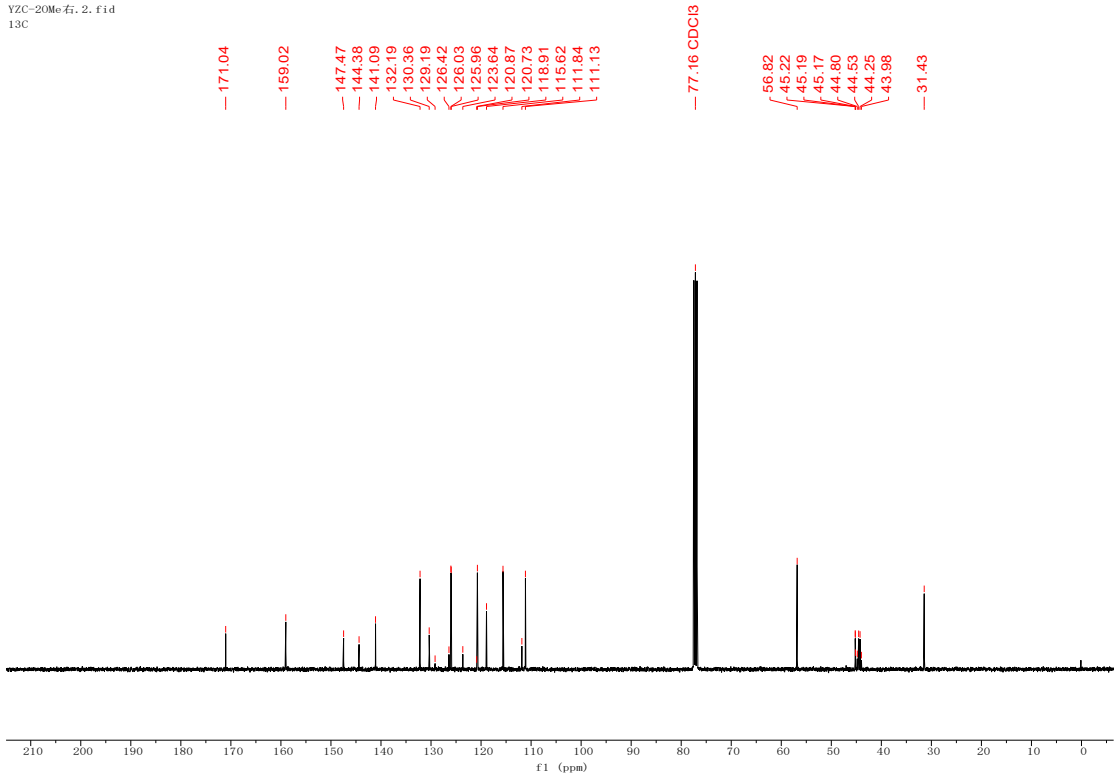

### <sup>19</sup>F NMR

YZC-20Me.zi. 3. fid  
19F

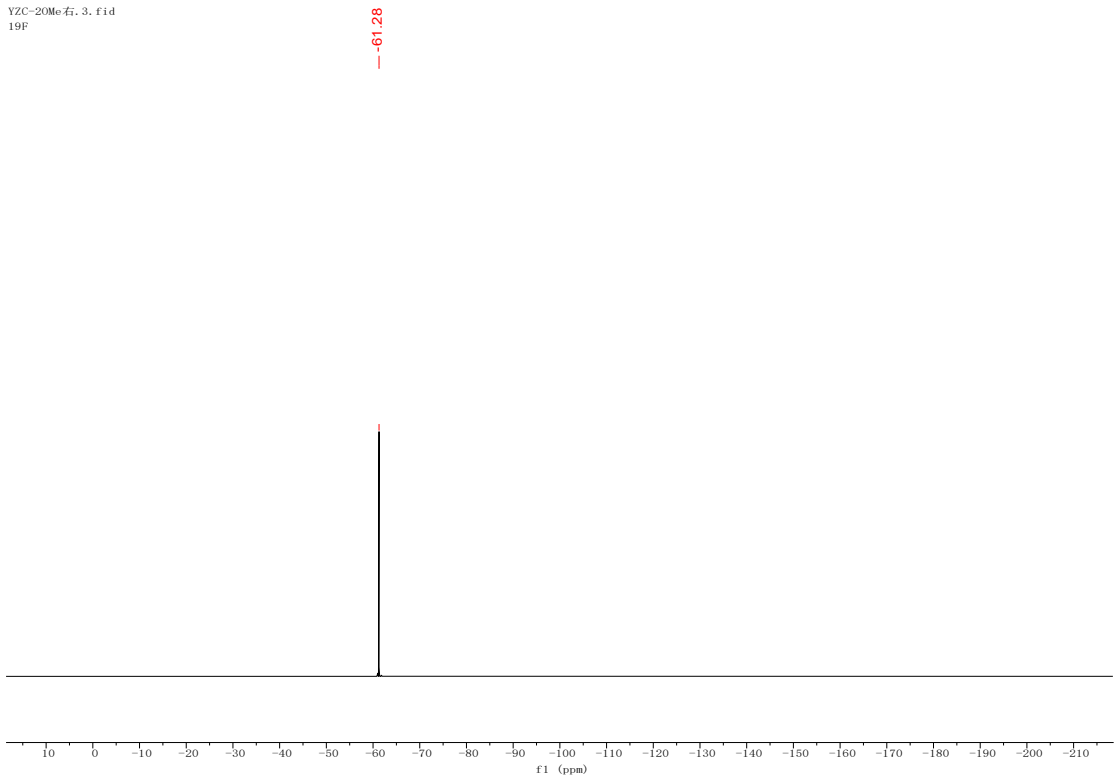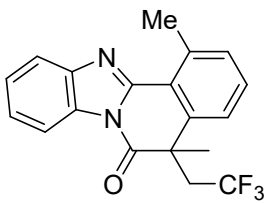

### 3p

## <sup>1</sup>H NMR

YZC-2Me右. 1. fid  
1H

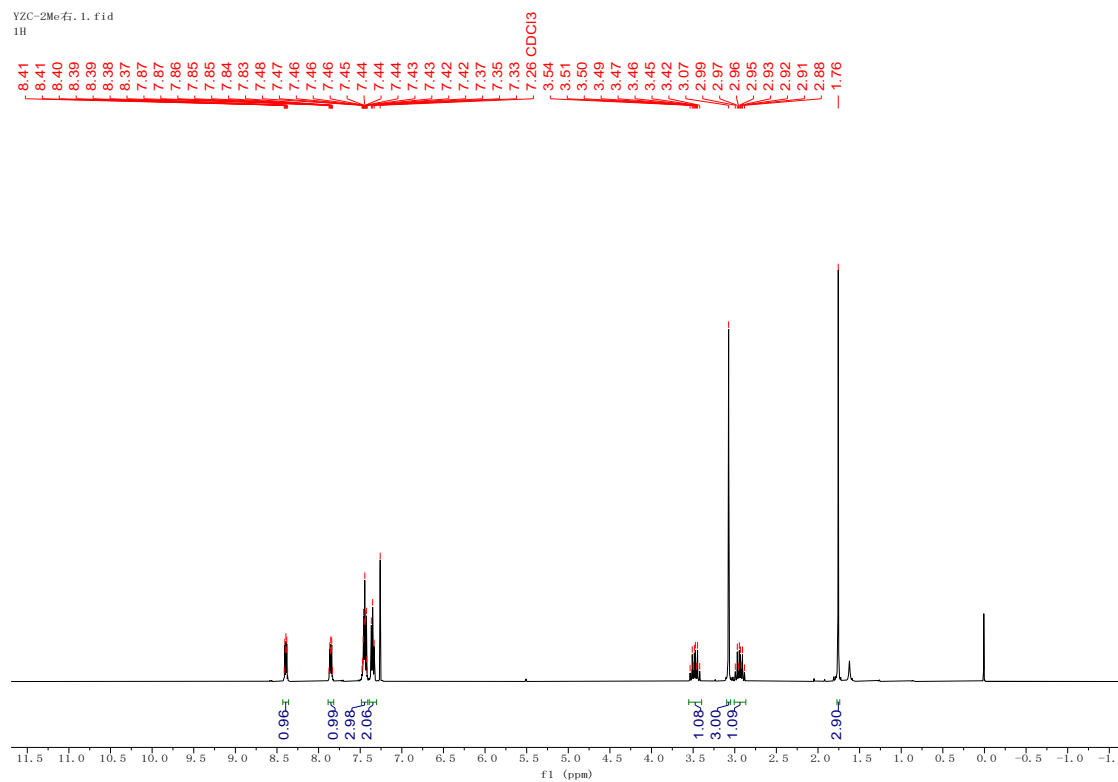

## <sup>13</sup>C NMR

YZC-2Me右. 2. fid  
13C

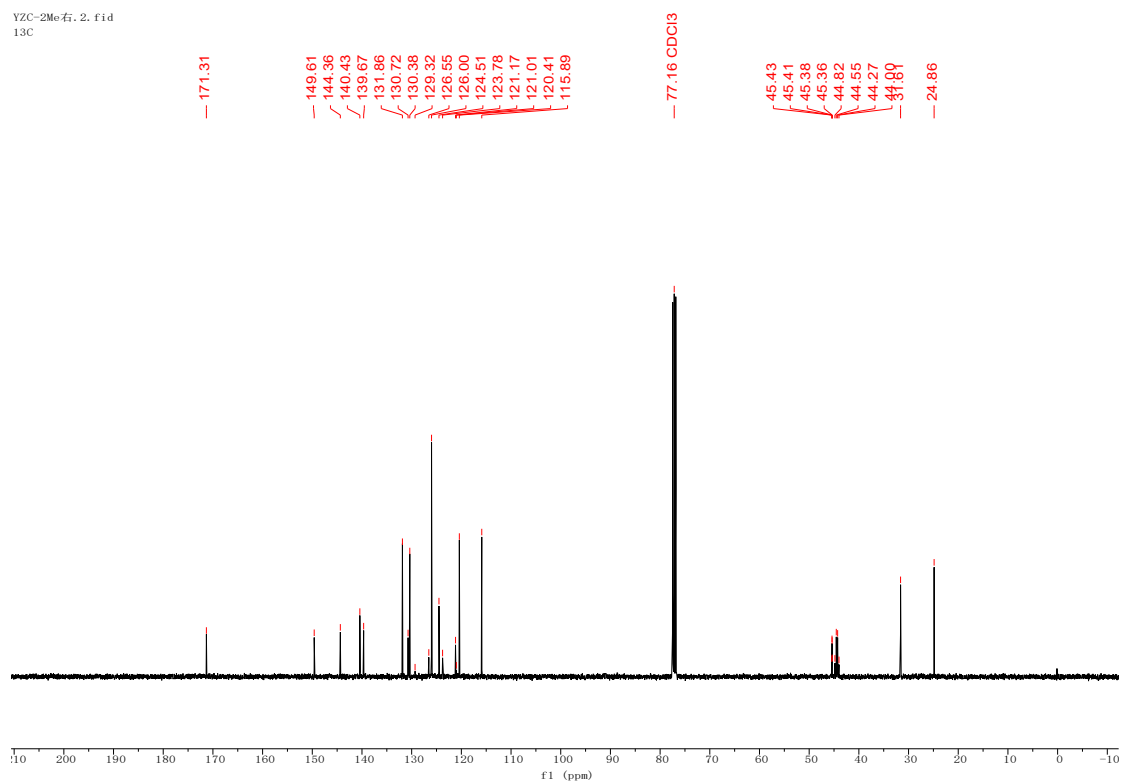

# <sup>19</sup>F NMR

YZC-2Me右. 3. fid  
19F

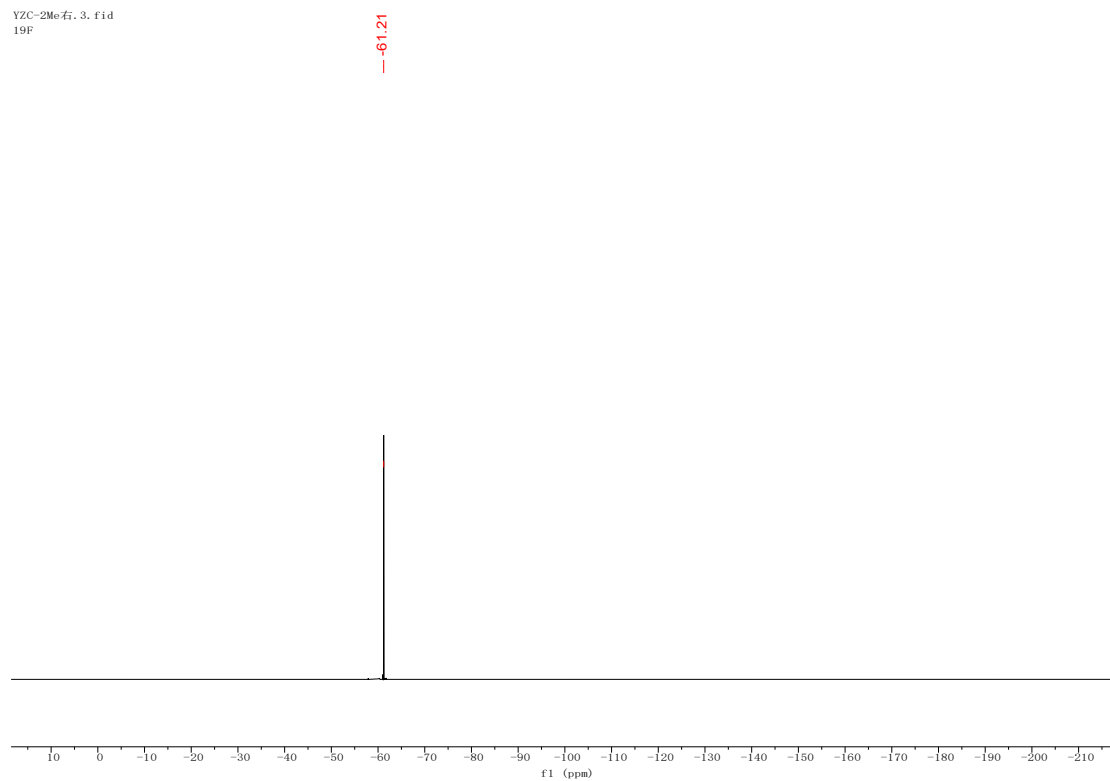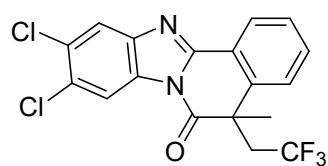

**3q**

**<sup>1</sup>H NMR**

YZC-LC12.1.fid

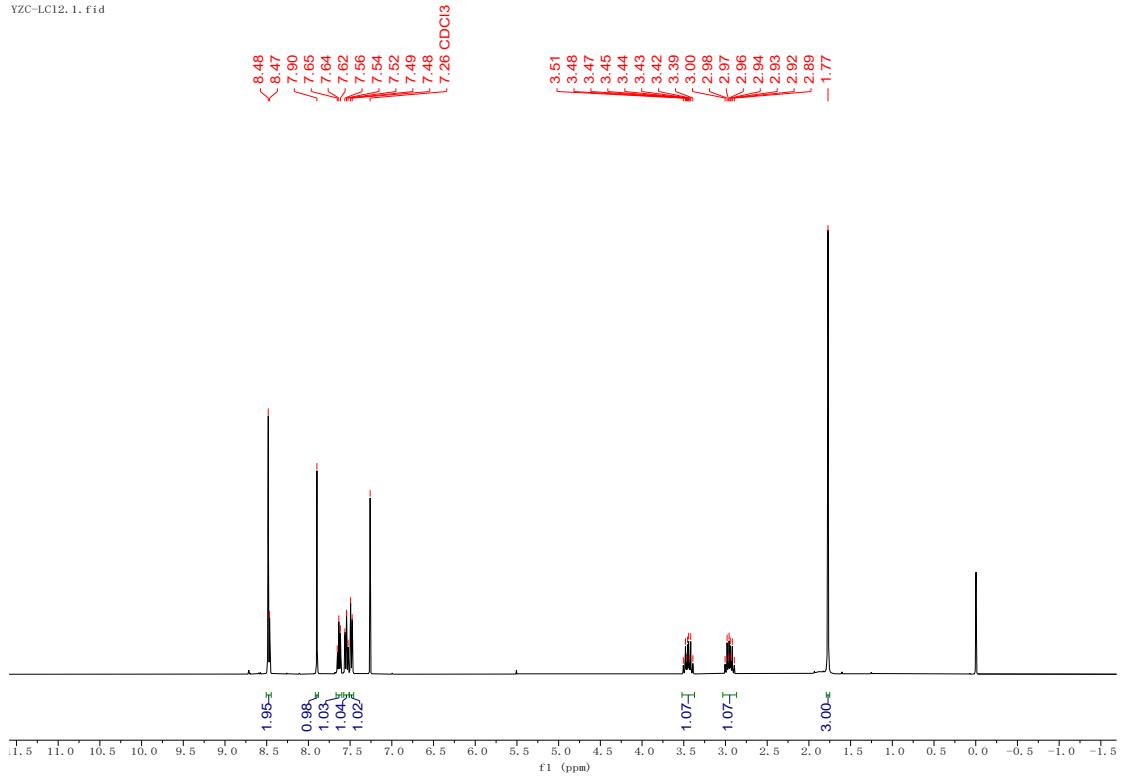

### <sup>13</sup>C NMR

YZC-LC12.2.fid

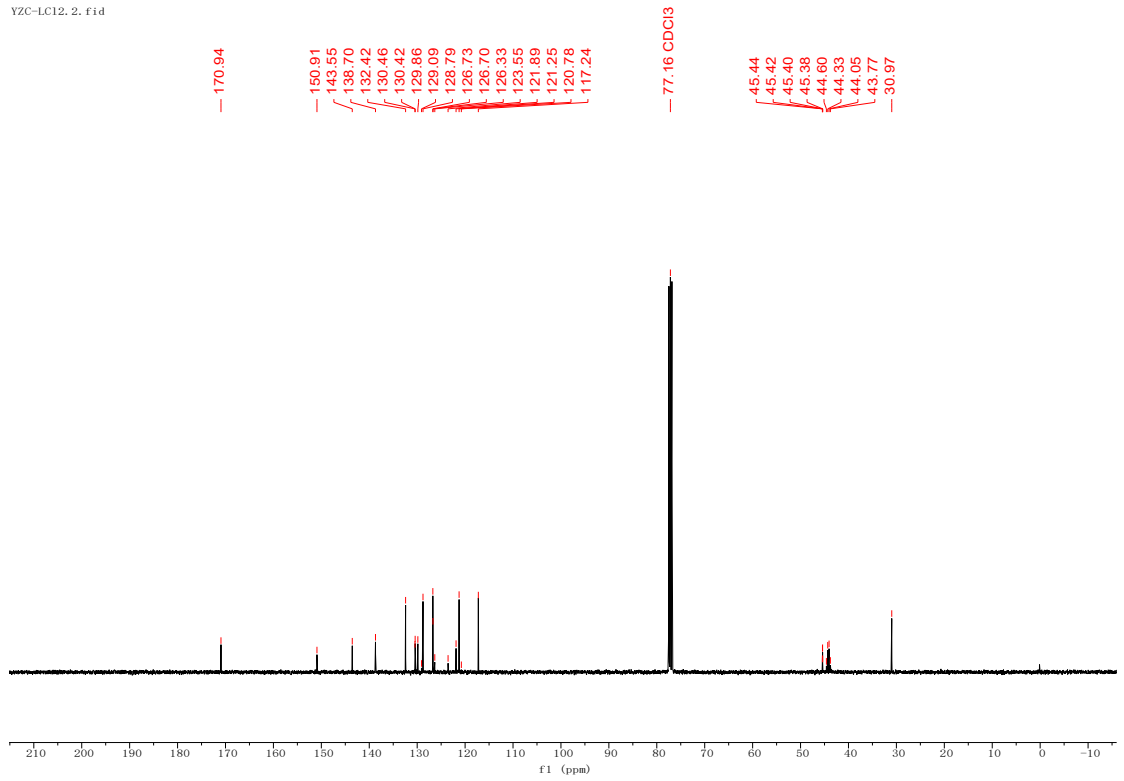



# <sup>19</sup>F NMR

YZC-LC12.3.fid

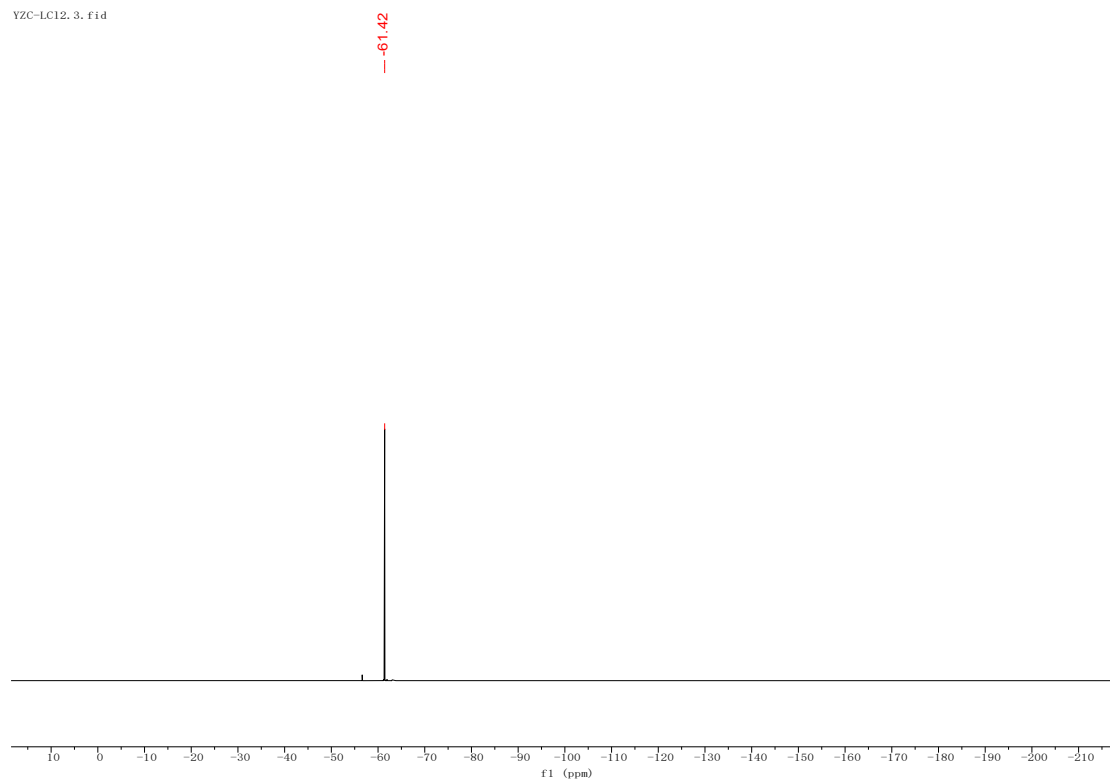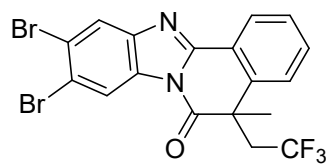

3r

# <sup>1</sup>H NMR

yzc-L2Br-x.1.fid  
1H

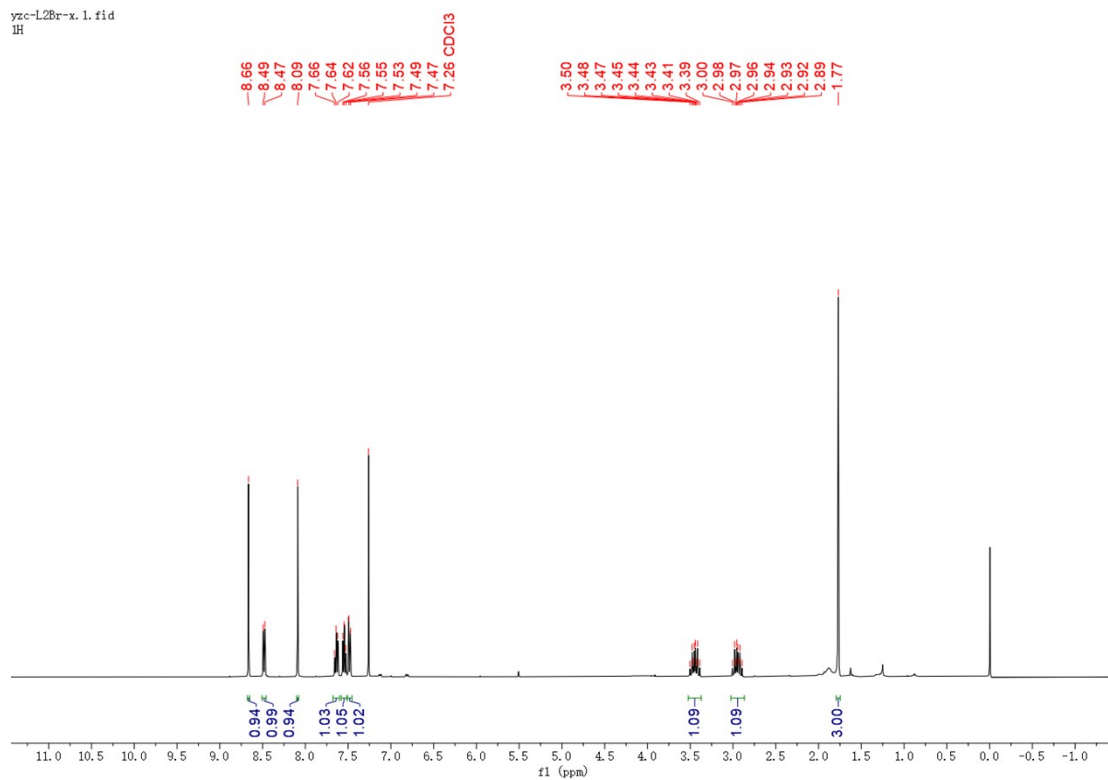

### <sup>13</sup>C NMR

yzc-L2Br-x.2.fid  
<sup>13</sup>C

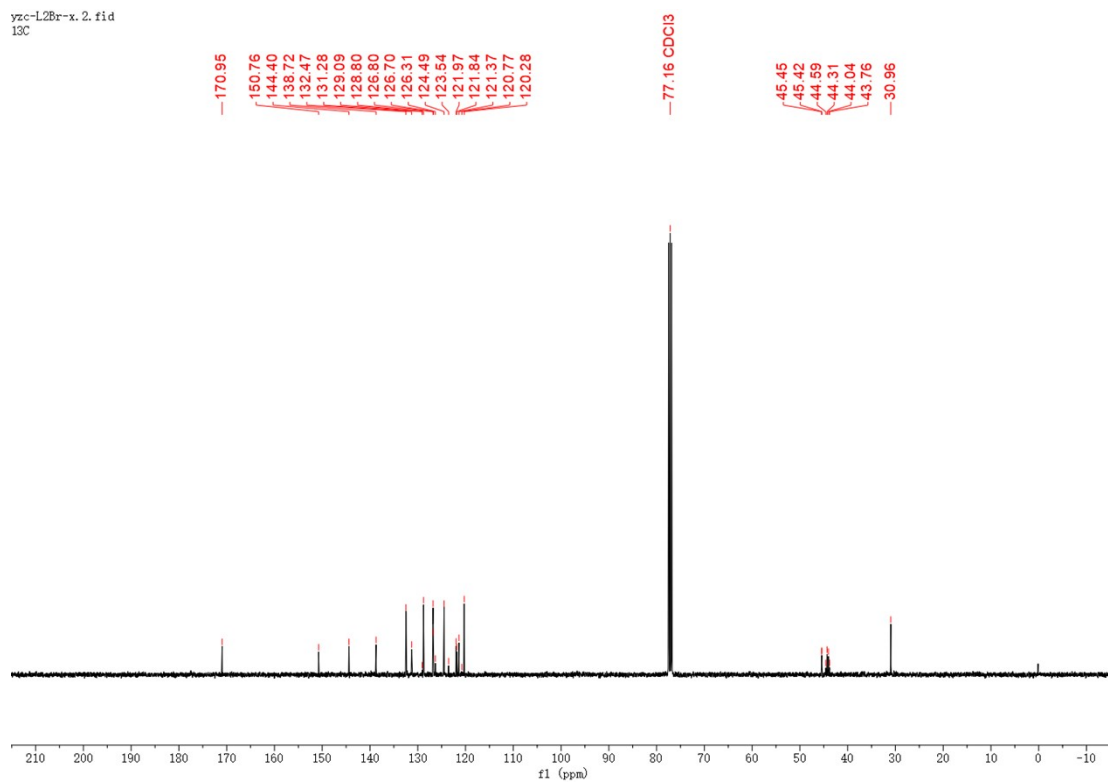

### <sup>19</sup>F NMR

yzc-L2Br-x.3.fid  
19F

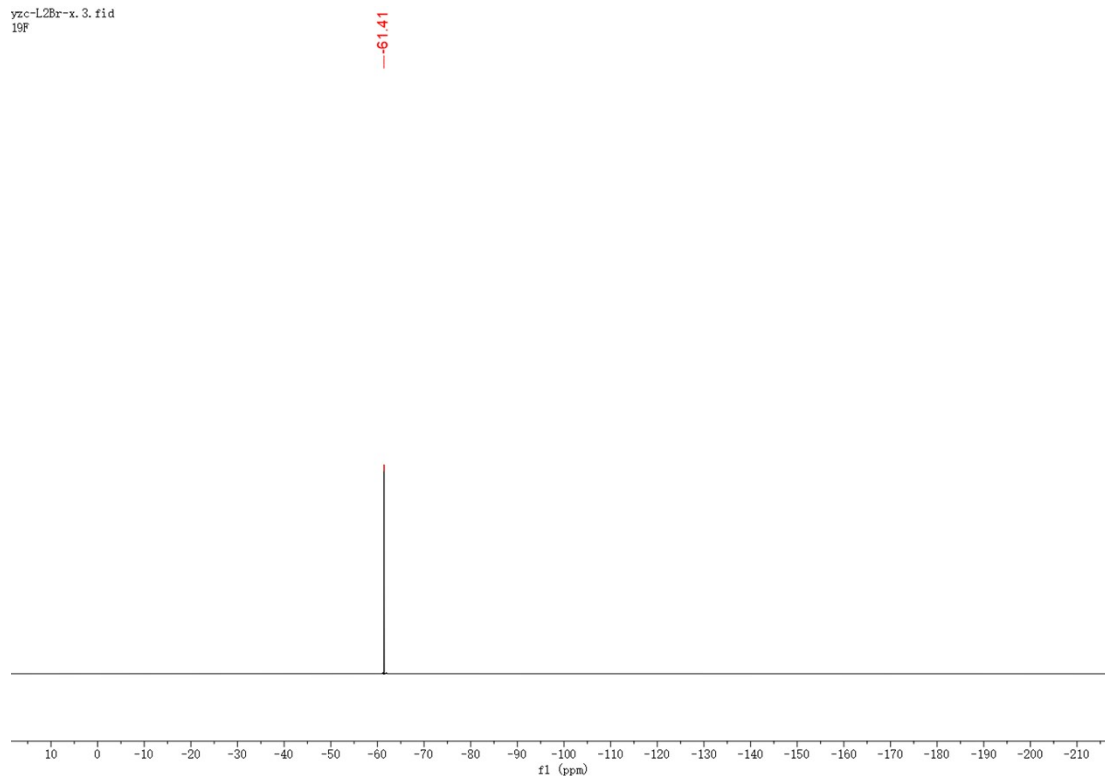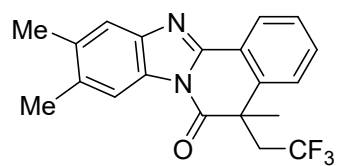

3s

<sup>1</sup>H NMR

YZC-LMe2.1.fid

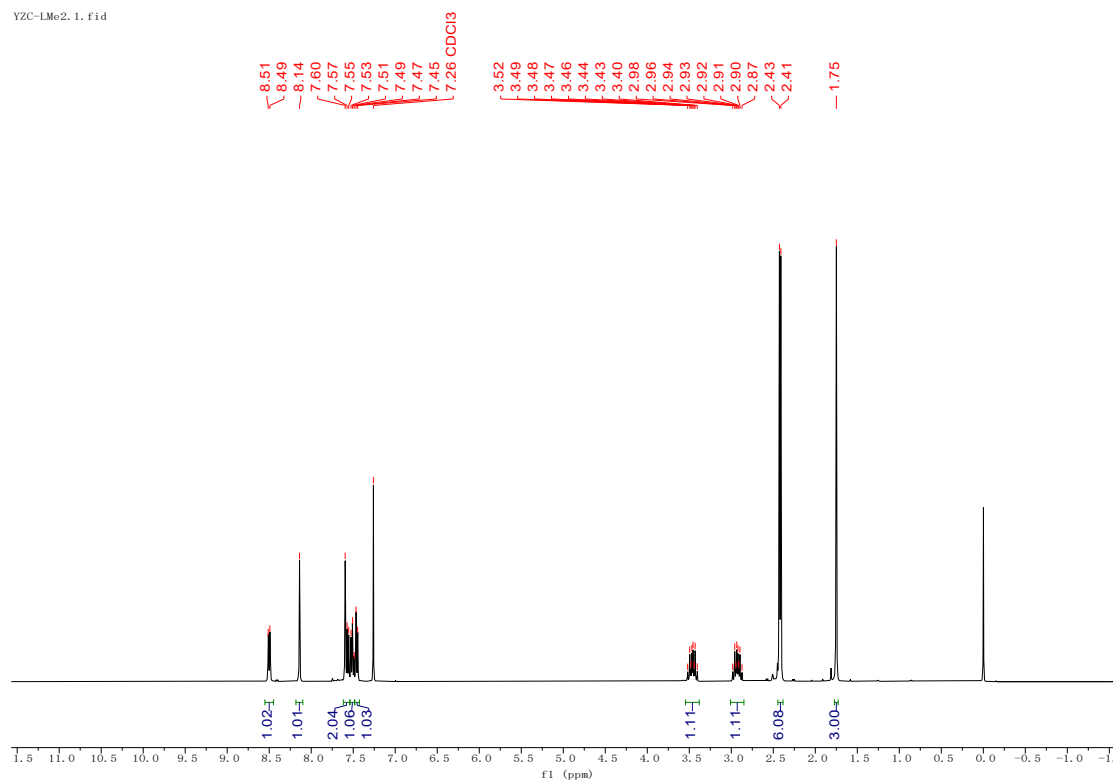

# <sup>13</sup>C NMR

YZC-LMe2.2.fid

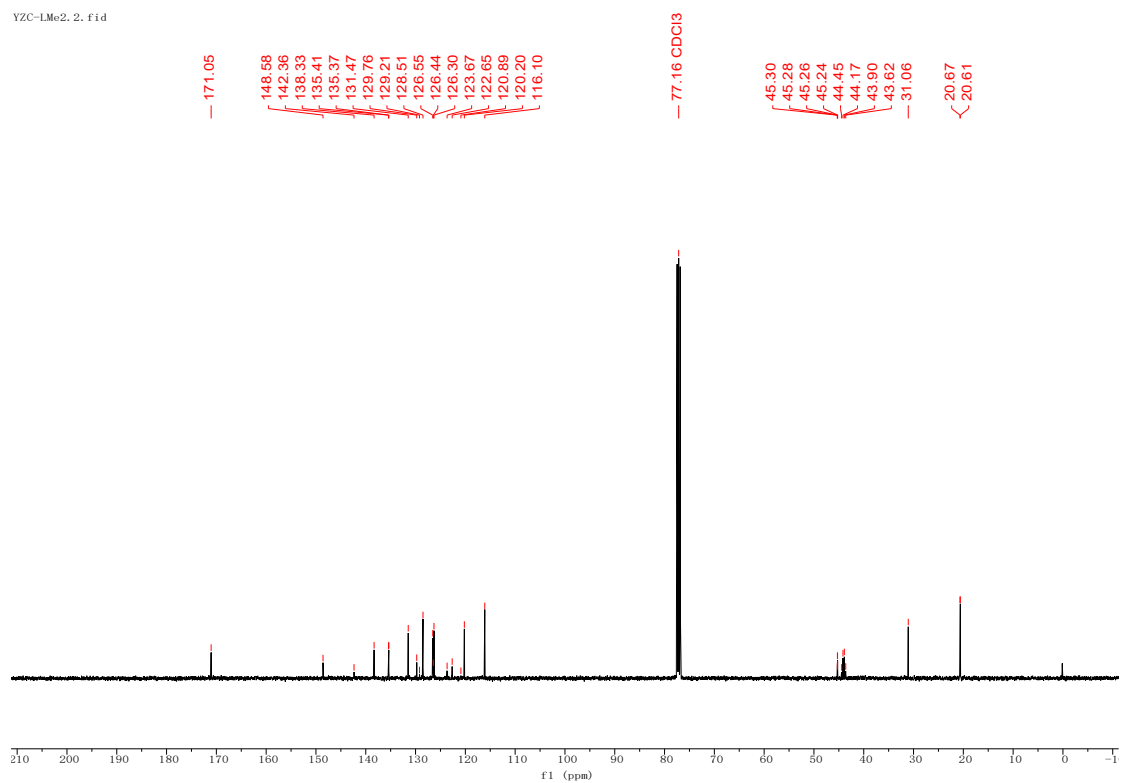

# <sup>19</sup>F NMR

YZC-LMe2.2.fid

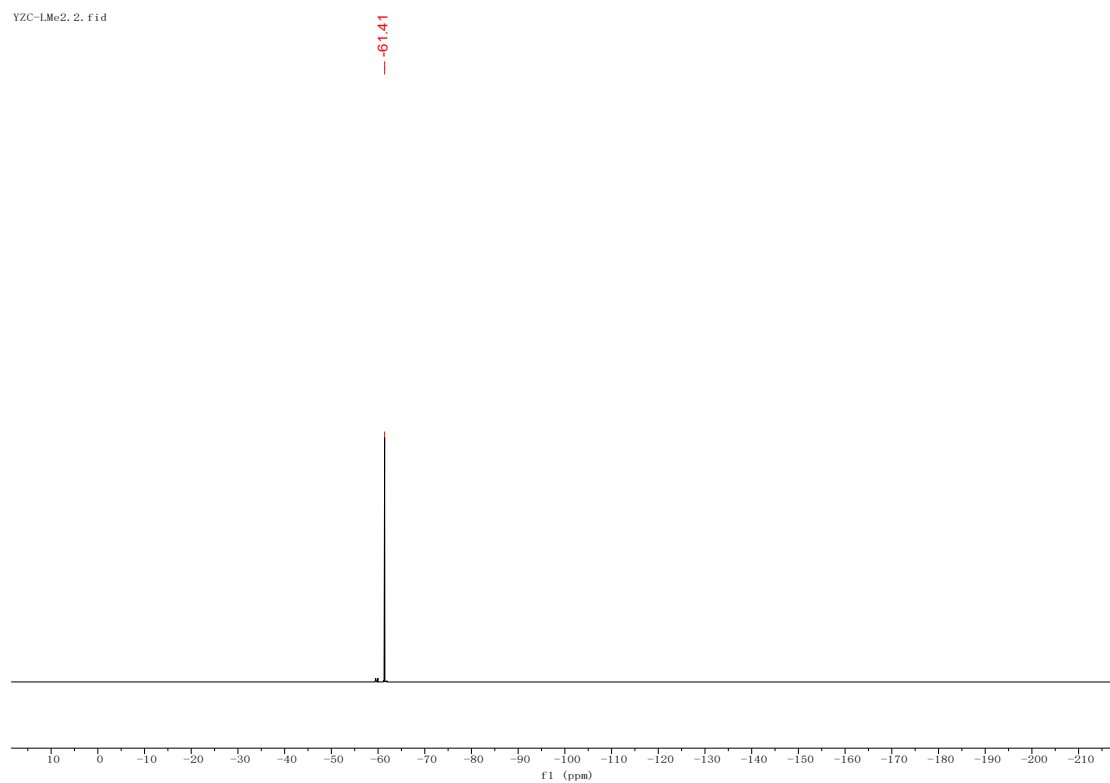

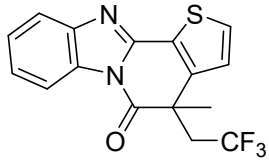

3t

<sup>1</sup>H NMR

yzc-saifen-x. 1. fid  
IH

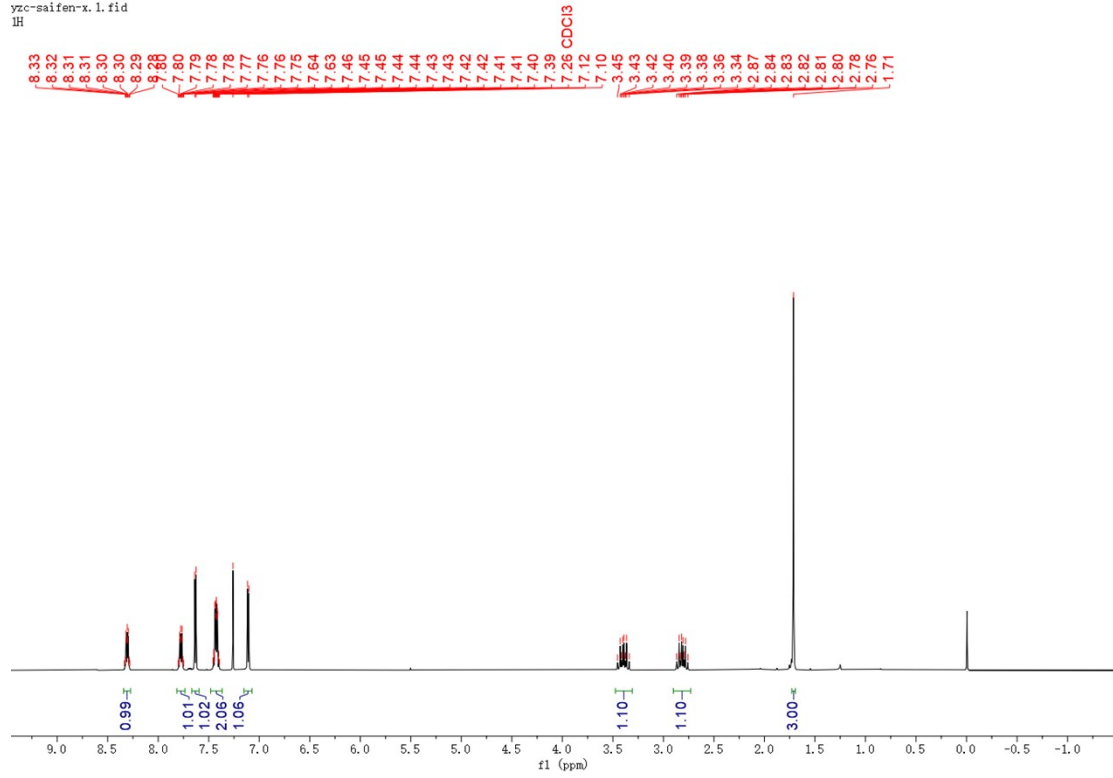

<sup>13</sup>C NMR

yzc-saifen-x. 2. fid  
13C

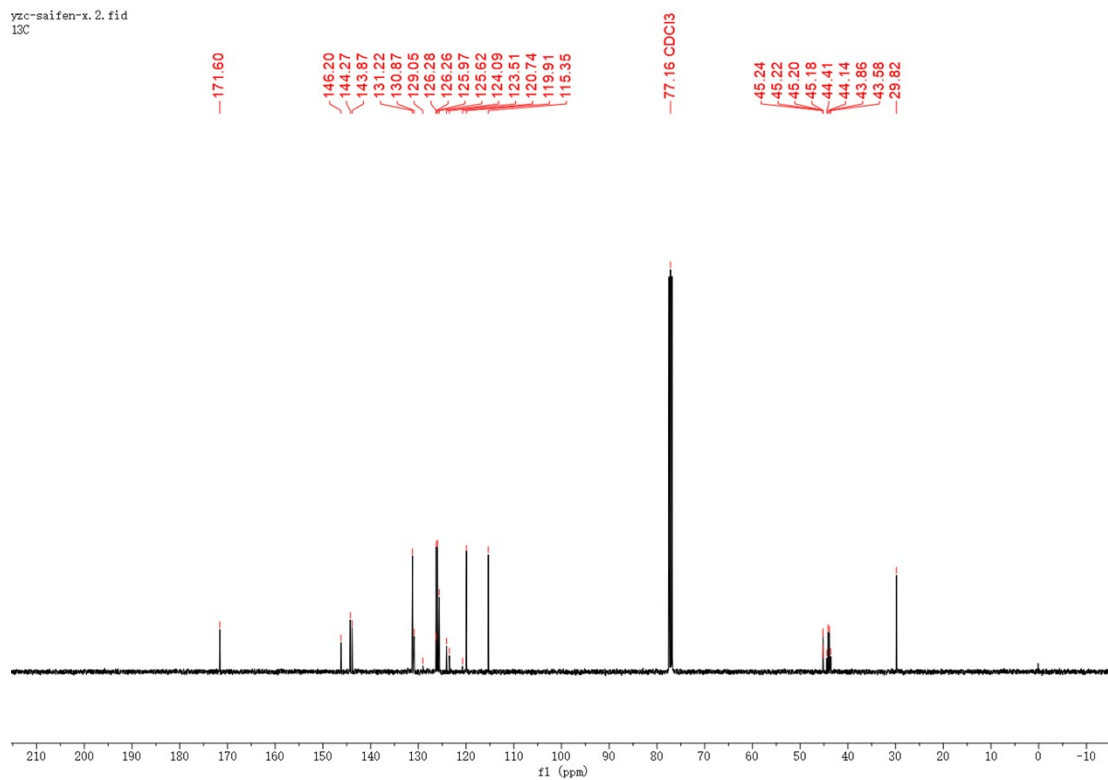

### <sup>19</sup>F NMR

yzc-saifen-x. 3. fid  
19F

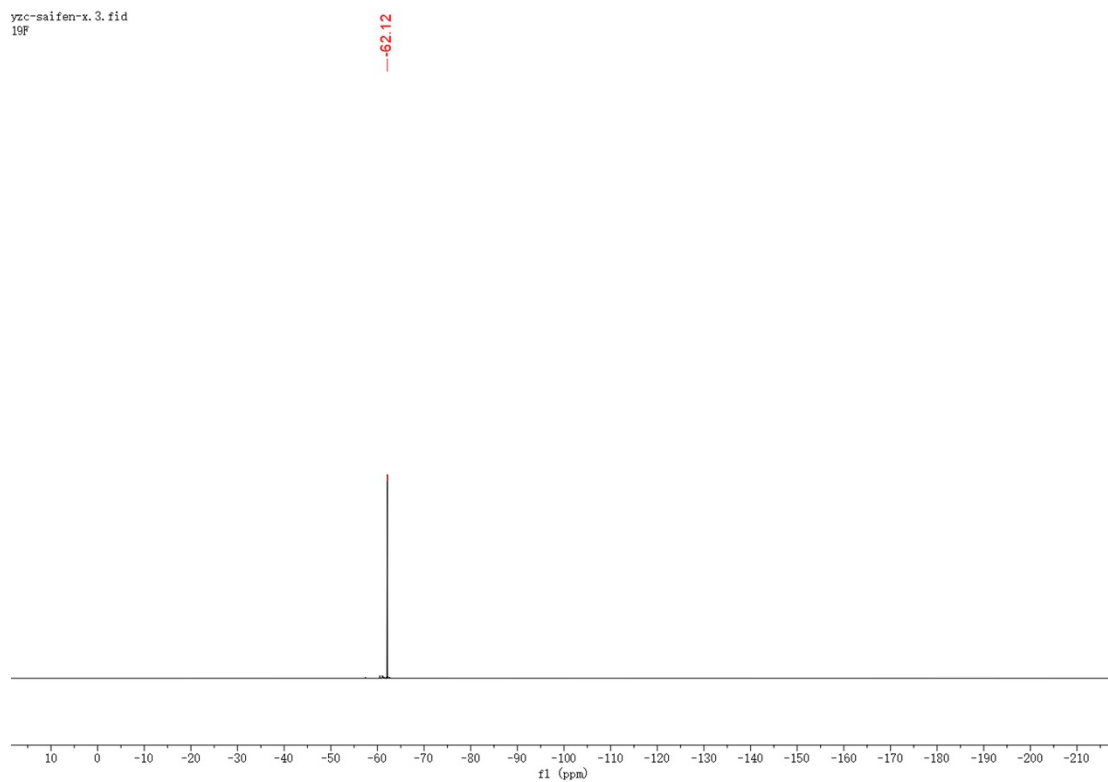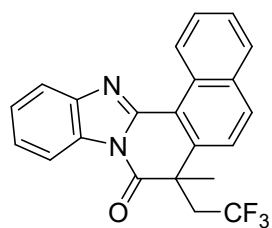

3u

### <sup>1</sup>H NMR

YZC-1 谱. 1. fid  
1H

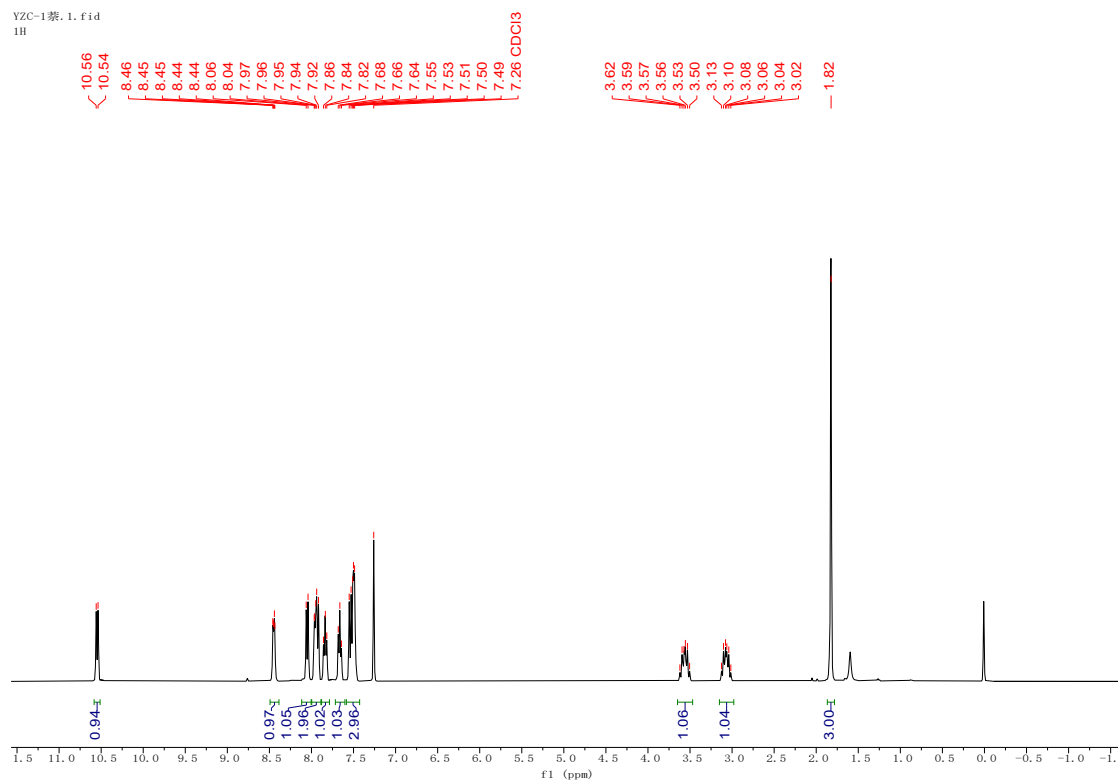

### <sup>13</sup>C NMR

YZC-1 谱. 2. fid  
13C

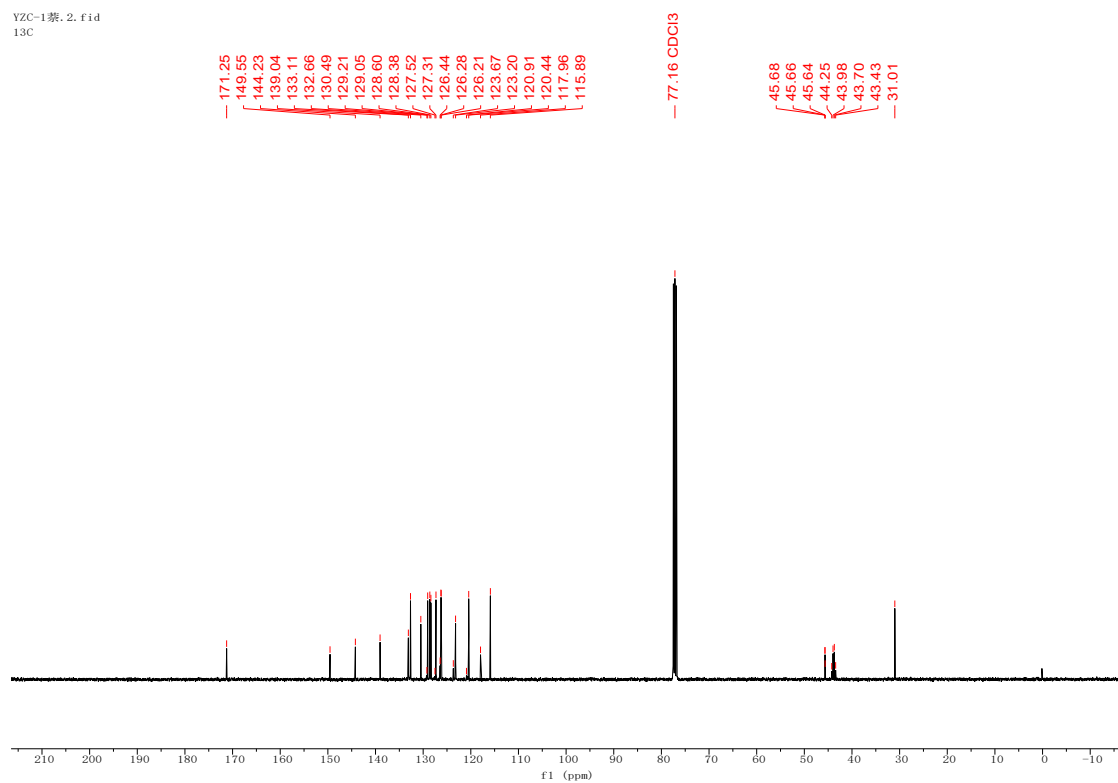

### <sup>19</sup>F NMR

YZC-1 聚. 3. fid  
19F

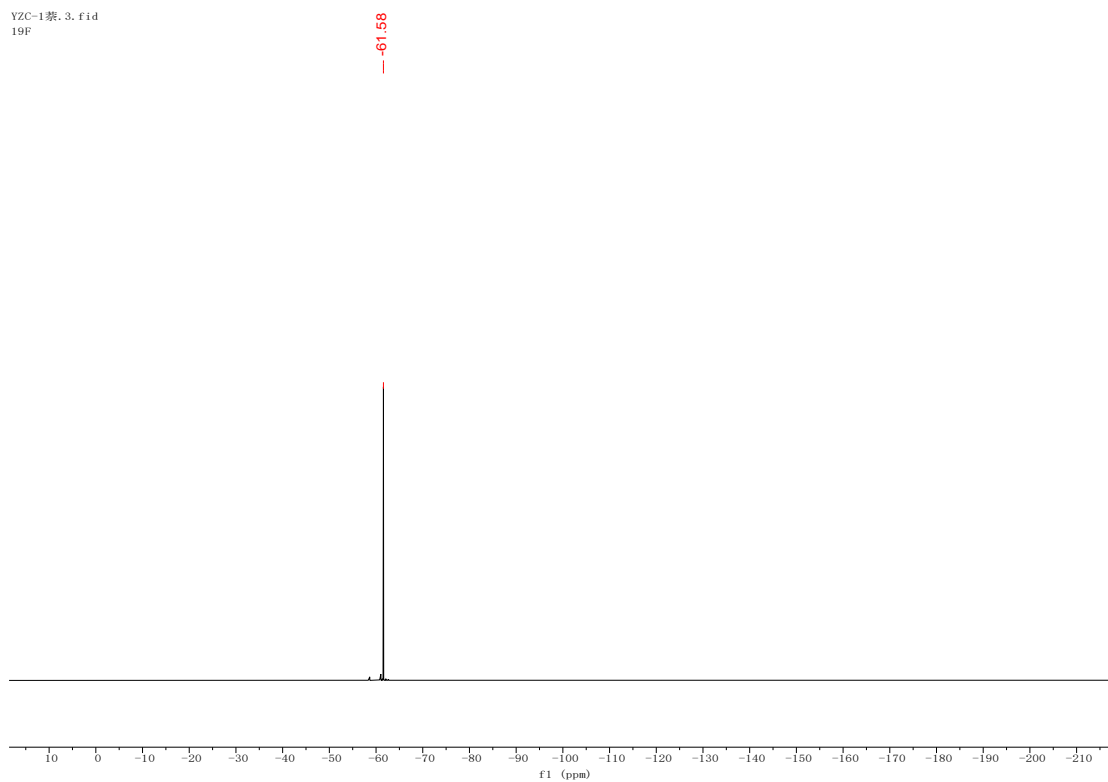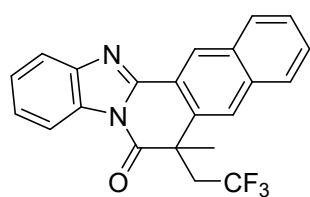

**3v**

**$^1\text{H}$  NMR**



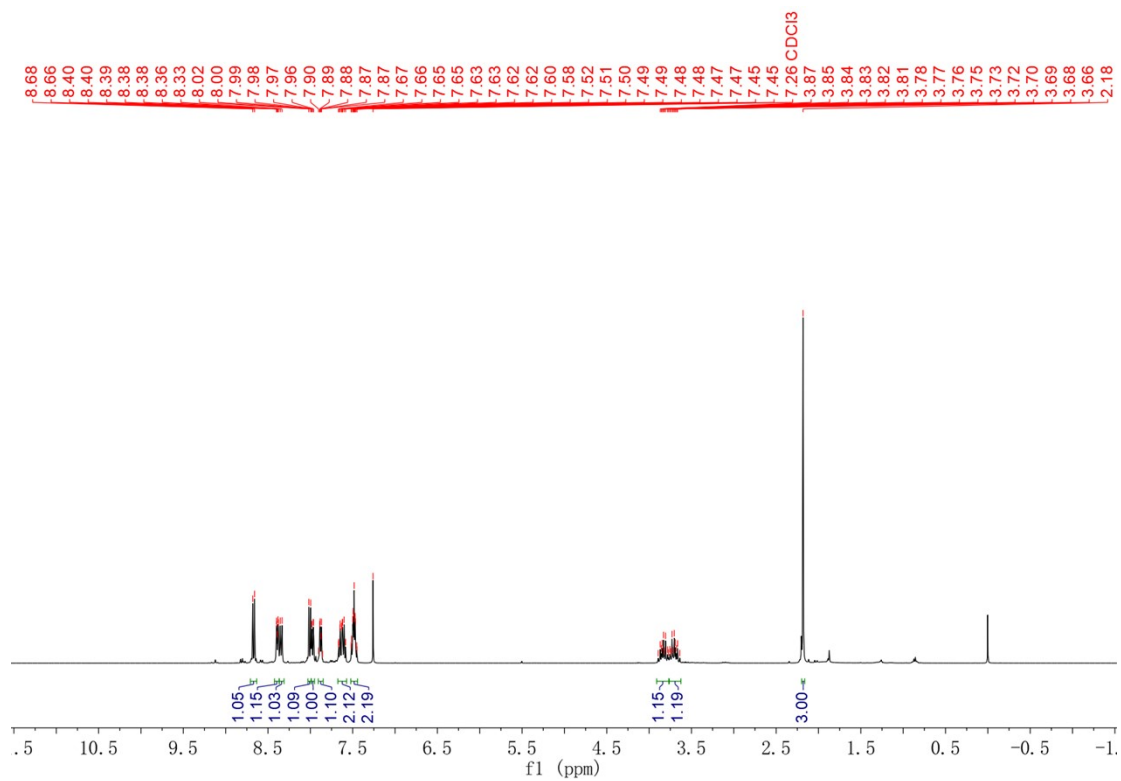

**<sup>13</sup>C NMR**

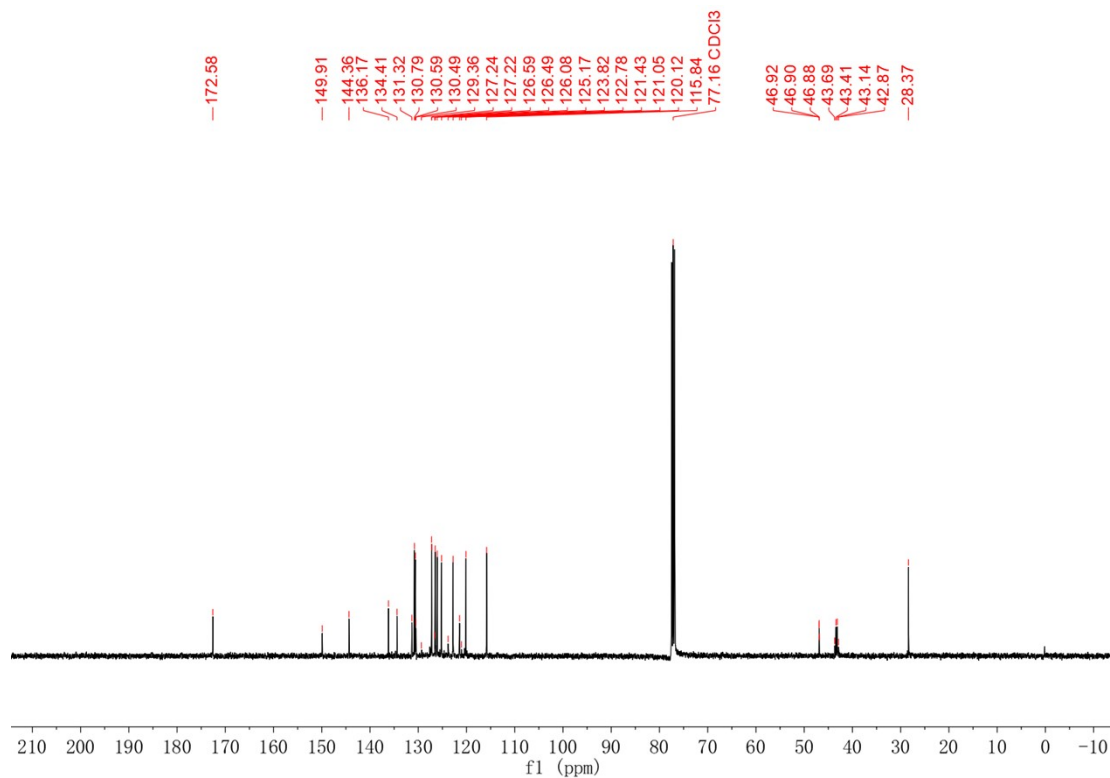

**<sup>19</sup>F NMR**

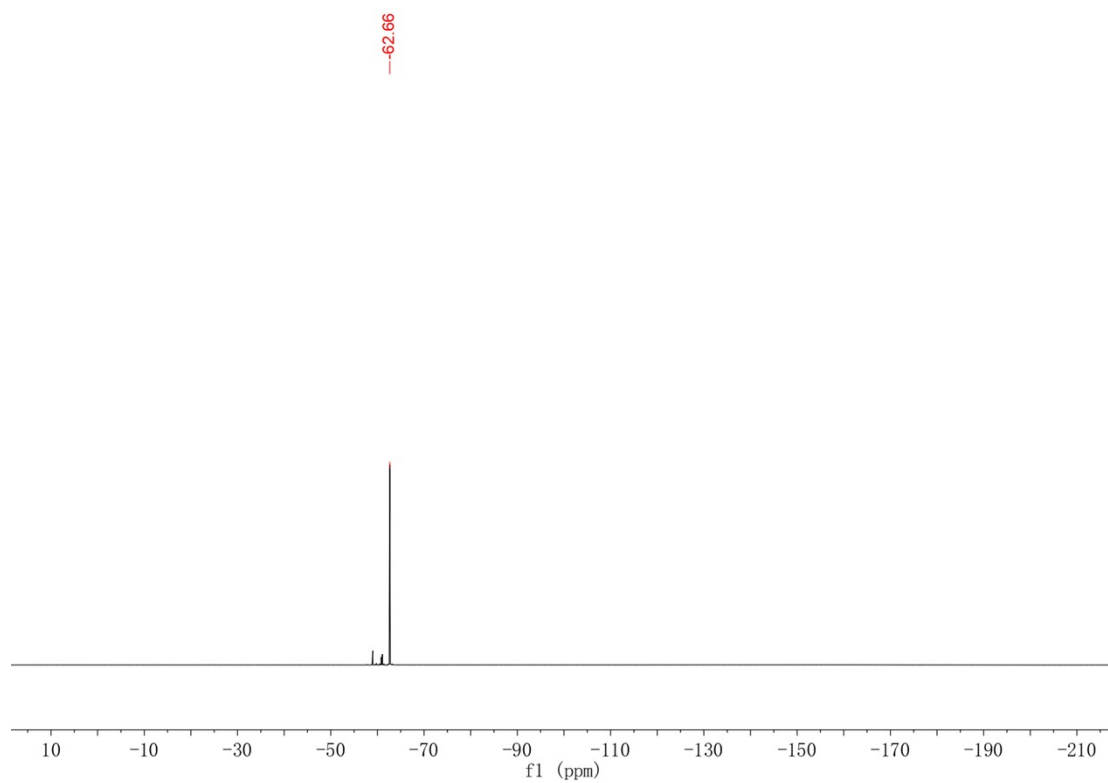

## Reference

- [1] K. Sun, G. F. Li, S. Guo, Z. G. Zhang, G. S. Zhang, *Org. Biomol. Chem.*, **2021**, 19, 375-378.
